# Supplementary material for: Coupling of Co-expression Network Analysis and Machine Learning Validation Unearthed Potential Key Genes Involved in Rheumatoid Arthritis
Source: Front Genet. 2021 Feb 11;12:604714. doi: 10.3389/fgene.2021.604714 (PMC7905311; doi:10.3389/fgene.2021.604714)
Supplement: Supplementary file 4 [file Table_1.XLSX]

## Sheet: differential_analysis
	logFC	AveExpr	t	P.Value	adj.P.Val	B	threshold
CA4	2.1771	7.41531	60.5576	1.42016e-289	7.85632e-286	653.259	up
SLPI	1.69971	5.62987	59.7357	6.47947e-286	1.79222e-282	644.916	up
ARG1	2.13884	5.36351	59.342	3.77064e-284	6.95306e-281	640.843	up
ORM1	2.74444	6.03632	59.0648	6.65305e-283	9.20117e-280	637.963	up
TNFAIP6	1.66252	5.7846	57.8171	3.04475e-277	3.36871e-274	624.966	up
TPST1	1.70997	5.37752	57.0687	8.24672e-274	7.60348e-271	617.067	up
NUP62	-1.88708	6.77345	-56.9151	4.20901e-273	3.32632e-270	615.398	down
MMP9	2.81782	8.50304	56.8636	7.27618e-273	5.03148e-270	614.738	up
POLD2	-2.20284	5.35609	-55.551	9.22174e-267	5.6683e-264	600.845	down
IL1R2	2.80435	7.02596	55.1059	1.13396e-264	6.27306e-262	596.021	up
PGLYRP1	2.56688	7.66876	54.4414	1.56042e-261	7.8475e-259	588.775	up
SRF	-1.9151	5.96493	-53.357	2.31764e-256	1.06843e-253	576.919	down
NUP93	-0.818283	5.70552	-52.3673	1.37908e-251	5.86852e-249	565.93	down
S100P	2.80521	7.79413	51.7384	1.58581e-248	6.26621e-246	558.862	up
GNE	-0.933018	5.41983	-51.524	1.77181e-247	6.53444e-245	556.472	down
CTSG	1.87586	5.71139	51.3487	1.2813e-246	4.4301e-244	554.502	up
PUS1	-0.842898	5.45692	-50.5651	9.27264e-243	3.01743e-240	545.611	down
CAMP	2.60408	7.95027	49.5291	1.3216e-237	4.06171e-235	533.743	up
CD96	-1.2643	6.22145	-49.3016	1.82236e-236	5.30595e-234	531.141	down
CXCR3	-1.27363	4.86099	-48.8654	2.8416e-234	7.85987e-232	526.087	down
CD81	-1.84969	8.48963	-48.4377	4.10618e-232	1.08169e-229	521.046	down
HPS6	-1.08008	6.22436	-48.389	7.24432e-232	1.82162e-229	520.556	down
MFNG	-0.763076	8.02974	-48.0571	3.49717e-230	8.41146e-228	516.654	down
CBS	1.21126	4.78199	47.7491	1.29472e-228	2.98433e-226	513.071	up
IRF1	-1.32041	8.64539	-46.5129	2.86476e-222	6.33914e-220	498.421	down
TXLNA	-1.08186	6.26869	-46.0245	9.70707e-220	2.06537e-217	492.65	down
LCN2	1.96904	7.5783	45.9527	2.29232e-219	4.69671e-217	491.805	up
TMEM109	-0.911753	6.56688	-45.8251	1.05665e-218	2.08764e-216	490.271	down
TCN1	1.18553	6.33388	45.4783	6.78914e-217	1.29509e-214	486.095	up
SF3B2	-1.7547	7.58787	-45.4438	1.02819e-216	1.89598e-214	485.698	down
ECH1	-1.22537	7.15659	-45.3642	2.68041e-216	4.78324e-214	484.748	down
DNMT1	-1.21504	7.31253	-45.3002	5.78786e-216	1.00058e-213	483.978	down
HDC	-2.13166	4.70143	-44.9463	4.14946e-214	6.956e-212	479.694	down
TGM3	1.0898	5.64729	44.6741	1.12098e-212	1.8239e-210	476.371	up
EVL	-1.32054	8.95414	-44.4066	2.88321e-211	4.55712e-209	473.117	down
HLADRB4	-1.62199	8.19616	-43.5115	1.61662e-206	2.4842e-204	462.236	down
RNASE3	1.29108	5.41207	43.2751	2.94772e-205	4.40723e-203	459.299	up
DPEP3	1.01476	5.60317	43.125	1.8715e-204	2.72452e-202	457.442	up
EXTL3	0.898271	5.92865	42.9301	2.06802e-203	2.9334e-201	455.042	up
VNN3	1.02821	5.6279	42.7306	2.43127e-202	3.36244e-200	452.577	up
RETN	1.27858	5.9732	42.4709	6.06432e-201	8.1824e-199	449.37	up
DEFA4	1.69648	6.83717	42.3026	4.89559e-200	6.44819e-198	447.318	up
NUP214	1.27552	8.47288	41.4223	2.86634e-195	3.68758e-193	436.375	up
GLTSCR1	-0.698297	5.71369	-41.3768	5.06863e-195	6.37265e-193	435.729	down
NUCB1	-1.12788	8.78176	-40.8429	4.14912e-192	5.10065e-190	429.095	down
CD247	-1.20588	8.84625	-40.7445	1.43403e-191	1.72458e-189	427.855	down
ABCA1	1.2182	6.46165	40.4633	4.98587e-190	5.86847e-188	424.266	up
TXN	1.25872	8.36992	40.4135	9.35807e-190	1.07852e-187	423.697	up
MYL6	1.0932	11.0883	40.356	1.93609e-189	2.18581e-187	422.843	up
CNDP2	-0.69101	7.78983	-40.2922	4.34429e-189	4.80652e-187	422.162	down
DYSF	1.18611	8.34279	40.1851	1.6867e-188	1.82957e-186	420.809	up
MME	0.992407	5.62961	39.8608	1.0335e-186	1.09948e-184	416.599	up
ZNF696	-0.741238	4.2435	-39.7851	2.70452e-186	2.82291e-184	415.684	down
ECHDC3	1.21043	5.72245	39.62	2.21228e-185	2.26636e-183	413.543	up
RPUSD2	-0.647804	5.38606	-39.54	6.13228e-185	6.16796e-183	412.509	down
LFNG	-0.934688	7.71104	-39.1841	5.76338e-183	5.6934e-181	408.079	down
CDC37	-0.723884	8.73829	-39.1248	1.22976e-182	1.19351e-180	407.323	down
PLEKHF1	-1.18842	6.00291	-39.0541	3.04137e-182	2.90084e-180	406.34	down
FUT7	0.930365	6.67943	38.968	9.15563e-182	8.58457e-180	405.258	up
ATP6V0E2	-1.04378	6.73324	-38.9614	9.96241e-182	9.18534e-180	405.195	down
IL2RB	-1.18552	8.06479	-38.9264	1.56012e-181	1.41485e-179	404.789	down
TREML2	0.880798	5.5778	38.7884	9.15658e-181	8.17003e-179	402.905	up
RALGDS	-1.19667	7.23889	-38.7725	1.12317e-180	9.86247e-179	402.799	down
TFF3	0.80251	4.62437	38.5488	1.99009e-179	1.72018e-177	399.868	up
COPS7B	-0.61189	5.77445	-38.3668	2.0704e-178	1.76207e-176	397.491	down
POLR2A	-1.13973	7.4922	-38.3431	2.80805e-178	2.35366e-176	397.291	down
SND1	-0.926947	7.02785	-38.1968	1.85035e-177	1.52778e-175	395.386	down
PADI4	1.48966	8.97358	38.1454	3.58973e-177	2.92035e-175	394.758	up
TSC22D4	-1.1099	7.91686	-38.1416	3.77279e-177	3.02479e-175	394.705	down
RRAGD	1.07297	6.44179	38.1179	5.12243e-177	4.04819e-175	394.315	up
ALAS2	1.34404	7.01616	38.1061	5.96312e-177	4.64619e-175	394.2	up
DNAJA3	-0.806108	6.47978	-38.0341	1.51187e-176	1.14571e-174	393.251	down
GMDS	-0.616218	5.44665	-38.0384	1.43003e-176	1.09874e-174	393.246	down
REPS2	0.809653	5.31355	37.9489	4.54404e-176	3.39698e-174	392.097	up
MAGED1	-0.543394	6.01019	-37.9411	5.02242e-176	3.70454e-174	392.014	down
TLR5	0.860129	6.55902	37.9181	6.76559e-176	4.92464e-174	391.743	up
DCTD	-0.560836	6.19949	-37.8487	1.66085e-175	1.19322e-173	390.832	down
MPO	0.988795	5.18148	37.753	5.72814e-175	4.06257e-173	389.575	up
KLHL22	-0.632011	6.0607	-37.5793	5.43436e-174	3.80543e-172	387.336	down
MXD3	0.787662	5.21993	37.223	5.55362e-172	3.84032e-170	382.692	up
GDPD3	0.638869	5.3065	37.192	8.30474e-172	5.67183e-170	382.281	up
CPEB3	0.682117	5.14125	37.1092	2.44062e-171	1.64653e-169	381.212	up
KCNJ2	0.923258	6.85195	37.0496	5.3036e-171	3.53488e-169	380.5	up
GPR162	-1.20154	4.79569	-36.9428	2.1299e-170	1.40269e-168	379.065	down
RBM14	-0.816674	6.46115	-36.8279	9.52712e-170	6.20047e-168	377.602	down
TMEM43	-1.08284	6.99196	-36.7023	4.91045e-169	3.15868e-167	376.003	down
EDEM1	-0.723364	6.51436	-36.6716	7.32871e-169	4.66005e-167	375.565	down
F5	0.936096	6.55038	36.6291	1.27794e-168	8.03361e-167	374.996	up
ZDHHC14	-0.700826	4.47302	-36.476	9.45341e-168	5.87598e-166	372.987	down
CKLF	1.32998	8.84765	36.4341	1.63478e-167	1.00484e-165	372.551	up
SLC2A8	-0.847513	4.65892	-36.4181	2.01635e-167	1.22576e-165	372.216	down
TICAM1	-0.603957	5.04713	-36.3102	8.28238e-167	4.98023e-165	370.778	down
MAP4K1	-0.850197	6.75648	-36.2216	2.64336e-166	1.57237e-164	369.7	down
PGRMC2	-0.747414	5.99517	-36.1772	4.73145e-166	2.78451e-164	369.058	down
DDIT3	0.750968	5.5996	36.1609	5.86051e-166	3.41267e-164	368.817	up
PPP2R5A	0.854523	7.72827	35.6669	3.85826e-163	2.22332e-161	362.464	up
C16orf58	-0.965113	5.97357	-35.532	2.27742e-162	1.29884e-160	360.587	down
RANGAP1	-0.845201	5.98905	-35.4731	4.95189e-162	2.79529e-160	359.808	down
CDA	1.07388	7.47295	35.3689	1.95763e-161	1.0939e-159	358.525	up
S100A8	1.20789	11.9164	35.3316	3.20111e-161	1.77085e-159	358.006	up
NCR3	-1.09791	5.91732	-35.3246	3.50904e-161	1.92198e-159	357.853	down
TTC4	-0.575778	5.73004	-35.2951	5.1802e-161	2.80949e-159	357.438	down
CCDC106	-0.743083	4.16885	-35.2198	1.39905e-160	7.51413e-159	356.51	down
RING1	-0.686497	7.05569	-35.2019	1.77376e-160	9.43506e-159	356.31	down
ADM	-1.11158	6.74483	-35.1931	1.99134e-160	1.03925e-158	356.179	down
GPS1	-0.703794	5.9636	-35.1963	1.91023e-160	1.00642e-158	356.151	down
ATIC	-0.625117	6.84165	-35.1783	2.42263e-160	1.25252e-158	355.982	down
ST6GALNAC2	0.810246	5.83834	35.1168	5.46029e-160	2.79688e-158	355.083	up
LMNB2	-0.535088	4.74232	-35.0297	1.72451e-159	8.75227e-158	353.95	down
TOMM34	-0.650726	5.72142	-34.9742	3.5969e-159	1.80891e-157	353.2	down
VEGFB	-0.727597	5.28353	-34.9075	8.68683e-159	4.32933e-157	352.311	down
ECHDC2	-1.04417	6.65458	-34.8754	1.32896e-158	6.50601e-157	351.972	down
POLB	0.781871	6.14823	34.8767	1.30603e-158	6.45083e-157	351.926	up
SARS	-0.72266	7.49436	-34.829	2.45504e-158	1.18098e-156	351.411	down
BCAT2	-0.527652	5.23361	-34.8298	2.43021e-158	1.17929e-156	351.278	down
SOX13	-0.659397	4.14747	-34.7704	5.33615e-158	2.54479e-156	350.572	down
SPOCK2	-1.09123	8.72645	-34.7045	1.27771e-157	6.04125e-156	349.805	down
MPV17	-0.495453	5.92447	-34.693	1.48774e-157	6.97473e-156	349.488	non
PSMB10	-0.943753	9.21196	-34.4597	3.28414e-156	1.52671e-154	346.567	down
CENPB	-0.925911	6.65678	-34.4066	6.64853e-156	3.06497e-154	345.759	down
KLF2	-1.1043	10.2813	-34.3855	8.79543e-156	4.02118e-154	345.571	down
LSM2	-0.649533	6.7543	-34.3664	1.13398e-155	5.14193e-154	345.228	down
STK38	-0.91899	8.84323	-34.2851	3.34211e-155	1.50314e-153	344.248	down
ZZEF1	-0.626676	5.62234	-34.209	9.18075e-155	4.0958e-153	343.051	down
IMP3	-0.820862	7.48538	-34.1123	3.32355e-154	1.47087e-152	341.907	down
DYNC1H1	-0.805867	7.37087	-34.0745	5.49635e-154	2.41316e-152	341.397	down
RAB11FIP3	-0.586334	5.94317	-34.0453	8.10922e-154	3.5323e-152	340.89	down
MSRB2	1.02894	7.61504	33.9682	2.26237e-153	9.7777e-152	339.983	up
TJAP1	-0.624816	6.67643	-33.9467	3.01353e-153	1.29232e-151	339.642	down
BTBD2	-0.902857	6.95168	-33.9183	4.39856e-153	1.87176e-151	339.291	down
SLC37A4	-0.571703	5.14168	-33.7647	3.40973e-152	1.4399e-150	337.131	down
SRPK1	0.76956	6.91417	33.7158	6.54104e-152	2.74129e-150	336.571	up
ARL2	-0.78083	6.34915	-33.6318	2.00715e-151	8.34853e-150	335.419	down
HP	0.758256	5.07655	33.5126	9.85996e-151	4.07054e-149	333.785	up
KLF13	-0.727622	7.94865	-33.355	8.09797e-150	3.31837e-148	331.839	down
CEACAM4	0.692808	5.32579	33.3504	8.60603e-150	3.50063e-148	331.604	up
DFFB	-0.547813	5.16351	-33.2651	2.69267e-149	1.08729e-147	330.46	down
XYLT2	-0.634333	5.6634	-33.2644	2.71671e-149	1.08905e-147	330.459	down
LAG3	-0.814108	4.71049	-33.0772	3.33056e-148	1.32552e-146	327.977	down
FECH	0.840372	6.34682	33.0688	3.72464e-148	1.47176e-146	327.877	up
TAF15	-0.891165	6.82523	-32.973	1.34446e-147	5.27486e-146	326.659	down
SAFB	-0.529778	6.69794	-32.9561	1.68502e-147	6.56445e-146	326.415	down
HBD	1.22786	9.34802	32.9136	2.9783e-147	1.14416e-145	325.973	up
MTA2	-0.59418	5.21513	-32.9241	2.58979e-147	1.00187e-145	325.895	down
STK25	-0.490027	6.189	-32.8178	1.07608e-146	4.10542e-145	324.514	non
OLIG2	-0.903202	3.43702	-32.7899	1.5649e-146	5.92948e-145	324.236	down
CDK5R1	0.764655	5.71637	32.5821	2.54436e-145	9.5751e-144	321.313	up
GEMIN4	-0.638502	5.45122	-32.358	5.16458e-144	1.93043e-142	318.3	down
SNCA	-1.73327	7.53288	-32.3289	7.64355e-144	2.83786e-142	318.082	down
WDR18	-0.773163	6.14038	-32.3051	1.0527e-143	3.88237e-142	317.634	down
MYL6B	0.47545	5.15571	32.2497	2.21647e-143	8.1202e-142	316.848	non
MUTYH	-0.505902	5.89294	-32.0841	2.05949e-142	7.49547e-141	314.634	down
ZCCHC6	0.83553	7.7084	31.968	9.83843e-142	3.53417e-140	313.215	up
ARHGAP17	-0.698179	6.44763	-31.9729	9.20667e-142	3.32884e-140	313.191	down
GTPBP6	-0.796064	7.09966	-31.824	6.84559e-141	2.44321e-139	311.247	down
NDST1	0.651316	4.95499	31.7627	1.56479e-140	5.54898e-139	310.311	up
SLC19A1	0.56684	5.99696	31.531	3.56636e-139	1.25663e-137	307.177	up
RNF24	0.784791	7.13539	31.5124	4.5846e-139	1.60519e-137	307.03	up
MRPL22	0.70821	6.16021	31.3593	3.62293e-138	1.2605e-136	304.873	up
DHX34	0.615524	5.51807	31.2894	9.31653e-138	3.22119e-136	303.896	up
VNN1	0.996679	6.27013	31.2603	1.38094e-137	4.74495e-136	303.546	up
ADCK2	-0.5525	5.86565	-31.2303	2.07159e-137	7.07411e-136	303.119	down
SF3B3	-0.596216	6.40679	-31.2082	2.79473e-137	9.48494e-136	302.87	down
SNX19	-0.45597	5.642	-31.069	1.83469e-136	6.18872e-135	300.922	non
TIMM22	-0.631295	5.78495	-30.9846	5.74788e-136	1.92711e-134	299.794	down
CD9	-0.827324	6.60843	-30.9778	6.30054e-136	2.09967e-134	299.781	down
BET1L	-0.632184	6.77137	-30.9242	1.30198e-135	4.31291e-134	299.067	down
TOMM40	-0.583285	6.0315	-30.9025	1.74531e-135	5.74707e-134	298.701	down
IFT20	0.365431	6.66363	30.6931	2.97524e-134	9.68178e-133	295.914	non
LTBP4	-0.554144	4.90541	-30.6957	2.87444e-134	9.40911e-133	295.883	down
HADH	-0.508471	5.71495	-30.6591	4.72087e-134	1.52724e-132	295.379	down
RAB11FIP5	-0.468308	4.85394	-30.6202	7.99026e-134	2.56989e-132	294.865	non
ZDHHC3	0.59559	5.93346	30.4928	4.49728e-133	1.43809e-131	293.131	up
ZNF428	-0.703364	6.7936	-30.4516	7.85835e-133	2.49841e-131	292.673	down
ALG9	-0.41537	5.09302	-30.4383	9.40927e-133	2.97441e-131	292.382	non
STX10	0.733646	7.75265	30.3742	2.24391e-132	7.05301e-131	291.691	up
SIRPA	-0.720161	8.23865	-30.3414	3.50425e-132	1.09523e-130	291.289	down
CCPG1	0.712574	6.21188	30.3002	6.12495e-132	1.90355e-130	290.543	up
GOT1	-0.378548	5.07313	-30.2624	1.02286e-131	3.16116e-130	289.997	non
BLOC1S1	0.87891	7.7237	30.2468	1.26498e-131	3.88772e-130	289.959	up
SLC25A37	0.672775	9.70382	30.1994	2.40743e-131	7.35796e-130	289.411	up
AQP9	0.680424	9.30183	30.0991	9.39283e-131	2.83941e-129	288.041	up
ALDH9A1	-0.623871	7.71746	-30.1022	8.99778e-131	2.73493e-129	288.014	down
CCDC130	-0.546563	7.40255	-30.0865	1.11487e-130	3.35188e-129	287.774	down
CD6	-0.840513	7.94902	-30.0576	1.64936e-130	4.93203e-129	287.426	down
AARS	-0.627545	6.53974	-29.9627	5.98707e-130	1.78067e-128	286.013	down
CXCR6	-0.59879	4.40244	-29.8339	3.44291e-129	1.01851e-127	284.245	down
UBTD1	0.516608	5.27213	29.6839	2.6453e-128	7.78394e-127	282.141	up
ABCF1	-0.593902	7.07823	-29.6076	7.4714e-128	2.18687e-126	281.244	down
MOSPD2	0.630786	6.19012	29.534	2.03143e-127	5.91465e-126	280.137	up
EML2	-0.446732	5.80517	-29.4923	3.58409e-127	1.03807e-125	279.548	non
LHFPL2	0.664309	5.70281	29.4254	8.90118e-127	2.56465e-125	278.628	up
IL18R1	0.810539	5.91746	29.3286	3.32113e-126	9.51941e-125	277.325	up
LAGE3	-0.721454	6.06962	-29.3058	4.5331e-126	1.29264e-124	277.042	down
TEX261	-0.477609	6.5049	-29.2916	5.49982e-126	1.56026e-124	276.887	non
RFWD3	-0.439125	5.12858	-29.2284	1.30014e-125	3.66958e-124	275.946	non
PPP1R13B	-0.466634	4.83725	-29.1864	2.30106e-125	6.46166e-124	275.397	non
EIF4G3	0.627074	5.72175	29.1447	4.05877e-125	1.134e-123	274.81	up
CCDC92	-0.636049	6.85659	-29.097	7.77503e-125	2.16138e-123	274.281	down
CYP4F3	0.733132	6.64926	29.0771	1.01911e-124	2.81886e-123	273.969	up
ITPR3	-0.694505	6.72779	-29.0697	1.12712e-124	3.10211e-123	273.897	down
VASH1	-0.701368	4.98213	-29.0146	2.38716e-124	6.53751e-123	273.051	down
SLC41A3	-0.453014	5.37409	-28.9906	3.31203e-124	9.0257e-123	272.704	non
LTB4R	0.761957	7.03489	28.9751	4.08971e-124	1.10903e-122	272.621	up
IL18RAP	0.89435	8.29494	28.9021	1.10501e-123	2.98191e-122	271.734	up
SCAMP3	-0.523658	6.55424	-28.8935	1.24321e-123	3.33856e-122	271.476	down
FNBP1	-0.604194	8.5998	-28.8323	2.86216e-123	7.64901e-122	270.812	down
ZDHHC18	0.689669	7.2605	28.8316	2.8885e-123	7.68229e-122	270.69	up
NDUFB3	0.726493	7.43201	28.7647	7.18632e-123	1.90214e-121	269.796	up
AIM2	0.642791	5.81232	28.6698	2.61822e-122	6.89713e-121	268.348	up
PNPO	-0.562762	5.70809	-28.6196	5.19017e-122	1.36076e-120	267.667	down
PHACTR4	-0.352447	6.43723	-28.5632	1.11935e-121	2.92087e-120	266.962	non
E4F1	-0.635961	6.2593	-28.5487	1.36395e-121	3.54243e-120	266.752	down
BAZ2B	0.72106	6.84854	28.4933	2.90337e-121	7.50535e-120	266.041	up
CARHSP1	0.673994	7.23244	28.4567	4.78107e-121	1.22449e-119	265.583	up
PHF10	-0.555521	6.29328	-28.4583	4.68013e-121	1.20421e-119	265.522	down
TUBG2	-0.464221	4.52235	-28.4509	5.17296e-121	1.31875e-119	265.415	non
RNASE2	0.96545	7.81927	28.4389	6.09801e-121	1.54744e-119	265.391	up
SAMD14	0.665216	4.64639	28.389	1.20303e-120	3.03887e-119	264.577	up
PARP1	-0.583073	7.08672	-28.3344	2.53375e-120	6.37124e-119	263.92	down
USP10	0.818278	7.51169	28.3083	3.61715e-120	9.05432e-119	263.587	up
CKAP4	0.896986	7.69263	28.2938	4.40794e-120	1.09841e-118	263.405	up
SLC22A4	0.576204	5.41131	28.256	7.38127e-120	1.83109e-118	262.701	up
FASLG	-0.41257	4.75657	-28.0111	2.08323e-118	5.14483e-117	259.395	non
TTF2	-0.438504	5.14969	-27.9617	4.08995e-118	1.00558e-116	258.69	non
COL17A1	0.79661	3.71545	27.8895	1.09499e-117	2.68031e-116	257.879	up
BEST1	0.622049	6.12935	27.8378	2.21753e-117	5.40414e-116	257.031	up
FAM65A	-0.682473	6.94768	-27.8177	2.91561e-117	7.0742e-116	256.865	down
IGSF6	0.658318	9.14084	27.7052	1.35341e-116	3.25524e-115	255.483	up
YOD1	0.770524	6.40997	27.7073	1.31511e-116	3.17694e-115	255.28	up
HBQ1	0.717216	8.13743	27.69	1.66498e-116	3.9873e-115	255.215	up
PIK3R2	-0.717235	6.33966	-27.5988	5.78094e-116	1.37845e-114	253.814	down
DNAJB2	-0.756647	6.75596	-27.5414	1.26575e-115	3.0052e-114	253.078	down
ELP3	-0.477512	5.99129	-27.5028	2.14165e-115	5.06309e-114	252.463	non
TMEM158	1.00808	6.33147	27.4856	2.71096e-115	6.38171e-114	252.248	up
TRIM68	-0.404662	5.40455	-27.4669	3.49743e-115	8.19821e-114	251.936	non
ADA	-0.680587	6.36024	-27.4511	4.34121e-115	1.01332e-113	251.801	down
UBL5	0.951701	8.19671	27.4382	5.1741e-115	1.20265e-113	251.785	up
SLC2A5	0.567593	4.61611	27.4293	5.84411e-115	1.3527e-113	251.493	up
LSM3	0.491887	7.10669	27.3637	1.43045e-114	3.29718e-113	250.673	non
ADD1	-0.552208	8.05785	-27.3351	2.11235e-114	4.84876e-113	250.384	down
LITAF	-0.854106	9.74927	-27.2653	5.47703e-114	1.24687e-112	249.523	down
PCBP1	-0.646692	9.57469	-27.2576	6.08409e-114	1.37939e-112	249.41	down
RBM4B	-0.402517	5.68307	-27.2693	5.1884e-114	1.18604e-112	249.251	non
REXO4	-0.518814	5.7631	-27.1993	1.34914e-113	3.04631e-112	248.305	down
VPS37C	-0.72643	6.77861	-27.1905	1.52061e-113	3.41952e-112	248.295	down
PI3	0.830143	7.73891	27.1761	1.84982e-113	4.143e-112	248.176	up
APEX2	-0.385268	5.42767	-27.1744	1.89286e-113	4.2223e-112	247.947	non
ITGA2B	0.88511	7.88576	27.0934	5.72395e-113	1.2666e-111	247.06	up
CEACAM6	0.779563	5.06604	27.0985	5.3354e-113	1.18536e-111	246.943	up
RBM12B	0.484031	5.52126	27.0813	6.74495e-113	1.48658e-111	246.678	non
TOR1A	0.526317	6.73417	27.0252	1.45165e-112	3.18671e-111	246.015	up
DGCR6L	-0.518343	5.77467	-27.011	1.76099e-112	3.85051e-111	245.738	down
SF3A3	-0.509392	6.91915	-26.9698	3.09072e-112	6.73145e-111	245.297	down
MAP6D1	-0.515509	3.95716	-26.8957	8.49198e-112	1.84226e-110	244.279	down
SBF1	-0.585404	6.72698	-26.8302	2.07691e-111	4.48807e-110	243.373	down
HK3	0.729608	7.86388	26.8219	2.3277e-111	5.01044e-110	243.358	up
MTF1	0.579359	6.50267	26.8001	3.13304e-111	6.71781e-110	242.918	up
NAT10	-0.452743	6.20873	-26.7773	4.27411e-111	9.12911e-110	242.59	non
HIRIP3	-0.495073	5.10657	-26.7106	1.06286e-110	2.26145e-109	241.63	non
CEACAM8	0.858064	5.3455	26.7007	1.216e-110	2.57737e-109	241.504	up
LY96	0.826327	7.78391	26.6863	1.48044e-110	3.12588e-109	241.502	up
KLHL3	-0.523556	5.27813	-26.6719	1.80053e-110	3.78727e-109	241.098	down
TGIF2	-0.381188	5.53584	-26.6676	1.91051e-110	4.00339e-109	241.037	non
UBIAD1	-0.349445	5.83669	-26.6365	2.92118e-110	6.0981e-109	240.63	non
CUEDC1	0.612183	5.96228	26.5907	5.45219e-110	1.13389e-108	240.009	up
SPCS2	-0.531572	6.20923	-26.5844	5.94192e-110	1.23111e-108	239.962	down
HDAC1	-0.61724	8.57539	-26.536	1.15092e-109	2.37572e-108	239.529	down
ANKZF1	0.481889	5.96132	26.5159	1.51316e-109	3.11183e-108	238.989	non
PTRH2	0.349339	5.90739	26.4894	2.17356e-109	4.45339e-108	238.622	non
CHST7	-0.565876	5.51603	-26.4704	2.81426e-109	5.74484e-108	238.354	down
KCNJ15	0.596358	5.21696	26.4509	3.67612e-109	7.47659e-108	238.093	up
BIN1	-0.631086	7.39139	-26.4182	5.73689e-109	1.16251e-107	237.83	down
SIRPB1	0.554257	6.17448	26.4033	7.03172e-109	1.41969e-107	237.473	up
GYPE	0.744326	5.15139	26.4027	7.08842e-109	1.42593e-107	237.447	up
SMARCAL1	-0.308195	5.31914	-26.3218	2.13844e-108	4.28618e-107	236.318	non
ZCCHC14	-0.347358	5.25957	-26.2059	1.03824e-107	2.07348e-106	234.741	non
GNL1	-0.441771	5.10656	-26.2012	1.10722e-107	2.2033e-106	234.685	non
MIPEP	-0.390067	4.2396	-26.0578	7.82774e-107	1.55208e-105	232.824	non
EFHD2	-0.601563	9.58347	-26.006	1.58626e-106	3.12284e-105	232.364	down
NCSTN	-0.584519	7.40985	-26.0083	1.53728e-106	3.03722e-105	232.246	down
SIAH2	0.644689	6.63689	25.9684	2.64726e-106	5.19313e-105	231.598	up
OPLAH	0.493209	4.681	25.9118	5.73273e-106	1.12062e-104	230.794	non
ZFP36	-0.807403	8.85535	-25.8683	1.03703e-105	2.01293e-104	230.455	down
YARS2	-0.354174	5.33066	-25.8708	1.00171e-105	1.95122e-104	230.173	non
ERCC2	-0.408332	4.49118	-25.8317	1.70771e-105	3.30316e-104	229.712	non
TXNIP	-0.838557	11.3585	-25.7272	7.09267e-105	1.36238e-103	228.625	down
DBI	0.433473	8.73805	25.732	6.64051e-105	1.27998e-103	228.583	non
ABCA7	0.407427	6.32367	25.6867	1.23187e-104	2.35803e-103	227.727	non
RUNX3	-0.644511	8.39254	-25.6075	3.62584e-104	6.91661e-103	226.875	down
SMARCD3	0.52672	6.06611	25.5351	9.71795e-104	1.84741e-102	225.635	up
COX7A2	0.74658	9.16316	25.444	3.36077e-103	6.36706e-102	224.689	up
ZC3H7A	-0.338186	6.71189	-25.3865	7.34795e-103	1.38733e-101	223.699	non
FLOT1	0.526771	8.19028	25.3625	1.01887e-102	1.91064e-101	223.516	up
PRMT5	0.387896	6.06201	25.3629	1.01333e-102	1.90672e-101	223.292	non
PIGQ	-0.5438	5.59295	-25.3562	1.1107e-102	2.07581e-101	223.179	down
GLRX5	0.769385	9.20982	25.3042	2.25474e-102	4.18565e-101	222.791	up
CPD	0.687712	6.68288	25.3191	1.84014e-102	3.42749e-101	222.764	up
ANXA3	0.636474	4.81947	25.2983	2.44174e-102	4.51763e-101	222.432	up
GMFG	0.793778	9.12274	25.2513	4.62895e-102	8.50742e-101	222.068	up
CYP27A1	-0.842973	5.93221	-25.2534	4.49806e-102	8.29442e-101	221.816	down
TMED3	-0.596797	6.87155	-25.2273	6.41619e-102	1.17531e-100	221.56	down
TRRAP	-0.465461	6.66457	-25.2052	8.67714e-102	1.58422e-100	221.23	non
GNPDA1	-0.513466	6.24281	-25.0223	1.0445e-100	1.90071e-99	218.696	down
CRKL	-0.602034	7.44434	-25.0118	1.204e-100	2.17664e-99	218.695	down
TNFSF14	0.586646	6.42234	25.012	1.20065e-100	2.17664e-99	218.56	up
ZBP1	0.623667	6.80482	24.9485	2.84763e-100	5.13131e-99	217.742	up
AKR7A2	-0.565371	6.98178	-24.8909	6.2395e-100	1.12068e-98	217	down
SMG5	0.411856	5.69578	24.879	7.33148e-100	1.31255e-98	216.686	non
GNB1L	-0.389773	4.53505	-24.8179	1.68309e-99	3.0035e-98	215.917	non
KIF1B	0.369729	5.31241	24.7248	5.95809e-99	1.05981e-97	214.589	non
SNRPG	0.5258	8.52644	24.6103	2.82181e-98	4.9873e-97	213.328	up
DAPK2	0.498429	4.90627	24.6203	2.46638e-98	4.37309e-97	213.206	non
PINK1	0.538573	6.57713	24.5807	4.22108e-98	7.43662e-97	212.721	up
ID3	-0.541444	5.27885	-24.57	4.87835e-98	8.56732e-97	212.491	down
PASK	-0.655956	6.24948	-24.5562	5.88752e-98	1.03069e-96	212.371	down
TRAK2	0.571093	6.71662	24.4971	1.3132e-97	2.29167e-96	211.604	up
PFDN5	0.722785	10.1199	24.4616	2.12726e-97	3.68903e-96	211.404	up
HLADMA	-0.814275	8.81592	-24.4532	2.38104e-97	4.1034e-96	211.232	down
ATG9A	0.442438	6.08438	24.4744	1.78634e-97	3.10755e-96	211.225	non
SLC36A1	0.475278	5.90876	24.4584	2.21869e-97	3.83557e-96	210.992	non
CASZ1	-0.360941	5.17456	-24.4432	2.72718e-97	4.68532e-96	210.771	non
LCP2	-0.729475	8.19074	-24.4063	4.4996e-97	7.68265e-96	210.55	down
DHRS12	0.380149	5.30136	24.4071	4.45563e-97	7.63112e-96	210.279	non
APBA3	-0.414133	6.52194	-24.3967	5.1321e-97	8.73563e-96	210.234	non
CEACAM1	0.503355	5.14617	24.3477	9.96918e-97	1.6917e-95	209.487	up
RRS1	-0.337035	5.72913	-24.337	1.15241e-96	1.94958e-95	209.34	non
CD300C	-0.487112	5.77955	-24.3327	1.22273e-96	2.06223e-95	209.289	non
FADD	0.51881	6.29616	24.2823	2.41965e-96	4.06855e-95	208.644	up
QPCT	0.629812	7.72987	24.261	3.23021e-96	5.41501e-95	208.522	up
PTP4A3	0.506409	5.6416	24.2564	3.43822e-96	5.7463e-95	208.239	up
KCTD17	-0.526548	5.06912	-24.2093	6.51343e-96	1.08531e-94	207.61	down
ZNF212	-0.357832	5.62243	-24.2065	6.76335e-96	1.12357e-94	207.565	non
DGAT1	0.419889	5.87081	24.1139	2.37483e-95	3.9334e-94	206.32	non
YIF1A	-0.35495	5.98806	-24.1108	2.4739e-95	4.08526e-94	206.299	non
PCSK7	-0.522858	6.99982	-24.0492	5.70388e-95	9.39103e-94	205.59	down
C16orf72	0.461816	7.32461	24.0395	6.50673e-95	1.06811e-93	205.481	non
DENND3	0.590813	7.05206	23.9857	1.3485e-94	2.20707e-93	204.719	up
NDUFA4	0.467083	8.82853	23.9687	1.69703e-94	2.76932e-93	204.663	non
CRISPLD2	0.736856	7.91198	23.9555	2.02891e-94	3.30115e-93	204.404	up
NDUFA1	0.501877	9.44621	23.9327	2.76299e-94	4.46925e-93	204.215	up
BUD31	0.403837	7.5137	23.9346	2.69206e-94	4.3673e-93	204.085	non
IL17RA	0.636249	8.3101	23.896	4.53768e-94	7.29722e-93	203.639	up
ZMPSTE24	0.419537	7.20855	23.9028	4.13967e-94	6.67657e-93	203.619	non
CTLA4	-0.430425	5.02885	-23.8688	6.55686e-94	1.05138e-92	203.003	non
PRPSAP1	-0.378095	6.64269	-23.8566	7.74054e-94	1.23759e-92	202.938	non
NDUFS7	-0.587337	7.25931	-23.8145	1.36743e-93	2.18001e-92	202.448	down
ARHGAP1	-0.473889	8.08871	-23.7541	3.09509e-93	4.92013e-92	201.715	non
HIST1H1C	0.597238	6.38348	23.7452	3.49506e-93	5.54002e-92	201.385	up
GINS3	-0.380507	4.19788	-23.7394	3.77598e-93	5.96821e-92	201.353	non
NSFL1C	0.464383	6.90634	23.7293	4.33076e-93	6.82557e-92	201.237	non
ZNF446	-0.382849	4.49797	-23.7065	5.89321e-93	9.26171e-92	200.868	non
NVL	-0.386256	4.66492	-23.6385	1.47866e-92	2.31727e-91	199.928	non
NBEAL2	0.523565	7.26262	23.6269	1.72911e-92	2.70209e-91	199.897	up
RGL2	0.618129	7.63847	23.6142	2.05132e-92	3.19659e-91	199.768	up
TCEB2	0.827402	9.05938	23.6005	2.47044e-92	3.81745e-91	199.703	up
DHRS1	-0.475783	6.56232	-23.6102	2.16775e-92	3.36854e-91	199.601	non
MRPS18C	0.365102	6.88477	23.6056	2.30679e-92	3.57455e-91	199.564	non
E2F2	-0.947936	6.81673	-23.5749	3.49134e-92	5.37997e-91	199.169	down
FBXO21	-0.347129	6.65712	-23.572	3.62892e-92	5.57644e-91	199.095	non
ST3GAL6	0.444193	5.04651	23.5547	4.58601e-92	7.02765e-91	198.767	non
LEPROT	0.552583	7.02692	23.5134	8.01088e-92	1.2242e-90	198.337	up
TIMELESS	-0.311376	4.77653	-23.4971	9.98345e-92	1.52145e-90	198.007	non
NCF4	0.574581	7.32052	23.4555	1.75229e-91	2.66309e-90	197.59	up
KCTD5	-0.393516	6.37438	-23.3763	5.09993e-91	7.72954e-90	196.421	non
STX3	0.567491	6.39432	23.3587	6.46486e-91	9.74486e-90	196.172	up
PAXIP1	-0.287928	5.67969	-23.3603	6.32771e-91	9.56418e-90	196.131	non
DCAKD	-0.460608	5.67421	-23.3567	6.64481e-91	9.98889e-90	196.087	non
IL1B	-0.751928	6.26928	-23.3134	1.19139e-90	1.78611e-89	195.571	down
IKBKG	-0.51386	7.01275	-23.2978	1.47016e-90	2.19809e-89	195.447	down
TIMM17B	0.302129	6.12204	23.2383	3.28102e-90	4.89234e-89	194.52	non
MGST3	0.635368	6.47763	23.178	7.39234e-90	1.09931e-88	193.747	up
SIGLEC5	0.501036	5.86254	23.149	1.09342e-89	1.62165e-88	193.293	up
LPIN1	-0.488542	6.65533	-23.134	1.33779e-89	1.97878e-88	193.195	non
ST3GAL4	0.450729	5.6327	23.0938	2.30068e-89	3.39397e-88	192.536	non
WDR19	-0.333995	5.02649	-23.07	3.16987e-89	4.66376e-88	192.226	non
TSPAN9	0.502698	5.35076	23.0671	3.29705e-89	4.838e-88	192.178	up
TCEA2	-0.288714	4.77125	-23.0015	7.97225e-89	1.16673e-87	191.332	non
ZCCHC11	-0.388912	5.974	-22.9854	9.90054e-89	1.44511e-87	191.112	non
CD7	-0.605198	7.44462	-22.9373	1.89011e-88	2.7516e-87	190.649	down
DAZAP2	-0.61681	10.22	-22.848	6.28621e-88	9.10349e-87	189.658	down
PRDM4	-0.407487	6.11444	-22.8741	4.42171e-88	6.42019e-87	189.633	non
ALOX5AP	0.74544	10.401	22.8267	8.36987e-88	1.20578e-86	189.372	up
CD40LG	-0.38547	5.02693	-22.8376	7.22514e-88	1.04359e-86	189.104	non
RNASEH2A	-0.270725	4.95046	-22.7902	1.36638e-87	1.96333e-86	188.474	non
C21orf2	-0.462911	5.47611	-22.7821	1.52382e-87	2.18388e-86	188.348	non
FEM1C	0.54699	6.32363	22.7728	1.72721e-87	2.46897e-86	188.282	up
CPSF4	-0.365624	6.77596	-22.7427	2.58631e-87	3.68749e-86	187.95	non
CNIH4	0.439852	7.69695	22.597	1.82956e-86	2.60183e-85	186.095	non
PRKDC	0.337713	6.71259	22.5831	2.20409e-86	3.12642e-85	185.789	non
ARIH2	-0.430028	6.75853	-22.5426	3.79842e-86	5.37413e-85	185.266	non
APEH	-0.346095	6.84941	-22.5324	4.35512e-86	6.14606e-85	185.139	non
TNFSF10	0.521166	8.60727	22.4962	7.07273e-86	9.90541e-85	184.831	up
ARHGAP19	0.411364	6.08179	22.5145	5.53759e-86	7.7949e-85	184.792	non
NARF	0.516973	7.39498	22.4919	7.49385e-86	1.04687e-84	184.651	up
ZNF330	-0.36388	6.67993	-22.4973	6.97053e-86	9.78705e-85	184.648	non
TESK1	-0.307857	5.48128	-22.4844	8.28837e-86	1.15494e-84	184.352	non
UQCRQ	0.794205	8.35819	22.4475	1.35846e-85	1.88346e-84	184.155	up
NDUFB6	0.390249	7.51951	22.4446	1.41345e-85	1.9548e-84	184.034	non
PPFIBP2	-0.418173	5.22538	-22.4589	1.16627e-85	1.62106e-84	184.015	non
RPL31	0.384595	11.3281	22.4219	1.91456e-85	2.63466e-84	183.996	non
FBXW4	-0.404549	6.0642	-22.4325	1.66221e-85	2.2931e-84	183.704	non
CYP4F12	0.449846	4.34363	22.3777	3.46471e-85	4.75602e-84	183.035	non
YARS	-0.492591	6.96402	-22.3698	3.8516e-85	5.27402e-84	182.981	non
ATP5L	0.726541	9.3916	22.3289	6.65922e-85	9.09601e-84	182.649	up
SNAPC4	-0.413488	5.65664	-22.2817	1.25275e-84	1.70696e-83	181.65	non
SCAP	-0.49835	7.47532	-22.2651	1.56374e-84	2.12025e-83	181.643	non
LASP1	-0.471443	9.6362	-22.246	2.0202e-84	2.73245e-83	181.567	non
PDLIM7	0.515978	5.7434	22.2695	1.47464e-84	2.00435e-83	181.486	up
NQO2	0.54936	6.22084	22.2268	2.60856e-84	3.51965e-83	180.959	up
PLOD1	0.588544	7.01899	22.2127	3.15232e-84	4.24297e-83	180.87	up
GSTP1	-0.637436	8.51545	-22.1965	3.91578e-84	5.25779e-83	180.83	down
NDUFS4	0.395219	7.04756	22.1879	4.38982e-84	5.88002e-83	180.545	non
IFNAR1	0.525543	6.62864	22.1777	5.03151e-84	6.72326e-83	180.352	up
MTM1	-0.258891	5.35527	-22.1714	5.47265e-84	7.29511e-83	180.164	non
PPP2R3C	0.449722	7.1638	22.1421	8.09986e-84	1.07713e-82	179.947	non
SLC27A3	-0.503412	7.0669	-22.1357	8.82902e-84	1.17127e-82	179.866	down
CECR5	-0.416265	6.73539	-22.0402	3.16277e-83	4.17577e-82	178.547	non
LLGL1	-0.345792	5.12951	-22.0493	2.79788e-83	3.70285e-82	178.544	non
BATF	0.379929	6.0004	22.0079	4.86491e-83	6.40778e-82	178.013	non
ATP5E	0.797371	10.4968	21.962	8.97702e-83	1.17125e-81	177.821	up
GFI1	-0.371931	5.00431	-21.977	7.34746e-83	9.65466e-82	177.589	non
SLC37A1	-0.317776	4.82574	-21.9736	7.69534e-83	1.00878e-81	177.561	non
XPO4	-0.283546	5.82516	-21.9633	8.82777e-83	1.1545e-81	177.41	non
PIGN	-0.330392	4.7281	-21.9554	9.80389e-83	1.27612e-81	177.331	non
PAK1	0.60831	7.51758	21.8695	3.08289e-82	4.00342e-81	176.355	up
CRELD2	-0.403516	6.58907	-21.8681	3.1427e-82	4.07152e-81	176.234	non
SH3PXD2A	-0.372534	5.08062	-21.8614	3.43517e-82	4.44003e-81	176.043	non
AK1	-0.364381	5.35129	-21.8431	4.38203e-82	5.65067e-81	175.789	non
FN3KRP	-0.4658	6.60953	-21.8241	5.64806e-82	7.26629e-81	175.653	non
COG2	-0.351275	6.21221	-21.8061	7.17705e-82	9.21194e-81	175.36	non
KIAA0355	-0.453798	6.04052	-21.797	8.10513e-82	1.03791e-80	175.221	non
PFKFB4	0.580881	7.53894	21.7743	1.09648e-81	1.39763e-80	175.091	up
SLC2A3	0.675241	9.6175	21.7579	1.36355e-81	1.73008e-80	175.055	up
CASP4	0.342323	7.04343	21.7657	1.23006e-81	1.56429e-80	174.918	non
EXT1	0.371965	5.41086	21.7749	1.08821e-81	1.39029e-80	174.88	non
ACO1	-0.305154	5.20462	-21.7542	1.43396e-81	1.81525e-80	174.607	non
ANXA5	-0.490645	8.74812	-21.7102	2.5762e-81	3.24637e-80	174.37	non
CDC34	0.475595	6.89868	21.7162	2.37854e-81	3.00413e-80	174.238	non
MYO9B	0.497651	7.02056	21.6806	3.8206e-81	4.80354e-80	173.781	non
GFRA2	-0.423285	3.86274	-21.6329	7.20579e-81	9.01865e-80	173.157	non
KIFAP3	-0.326677	5.47968	-21.6378	6.74865e-81	8.46566e-80	173.058	non
PMM2	0.348886	5.59717	21.6101	9.75445e-81	1.2181e-79	172.691	non
APH1B	0.386298	6.04437	21.5853	1.35559e-80	1.68899e-79	172.395	non
GMPR	0.62698	7.04548	21.5677	1.71487e-80	2.13184e-79	172.283	up
SDF2	0.413698	6.91442	21.5583	1.94255e-80	2.40946e-79	172.144	non
COMT	-0.506418	7.1803	-21.5299	2.83098e-80	3.50357e-79	171.819	down
TNF	-0.464378	4.92656	-21.5256	2.99884e-80	3.70303e-79	171.593	non
WDR4	-0.265546	4.81525	-21.5202	3.22362e-80	3.97173e-79	171.533	non
RPA1	-0.310846	7.19336	-21.4781	5.63774e-80	6.93066e-79	171.13	non
PPP2R1A	-0.401774	7.23461	-21.4741	5.94698e-80	7.29461e-79	171.083	non
MMP25	0.518966	7.67358	21.4656	6.65847e-80	8.14926e-79	171.008	up
HSPA6	0.623518	7.9612	21.4474	8.47421e-80	1.03031e-78	170.797	up
PHTF1	0.383478	4.87351	21.4626	6.91993e-80	8.45056e-79	170.774	non
B4GALT7	-0.376226	5.63643	-21.4579	7.36761e-80	8.97745e-79	170.679	non
PRR14	-0.480325	7.72936	-21.4185	1.24398e-79	1.50914e-78	170.405	non
FRS3	-0.358398	4.64694	-21.4082	1.42556e-79	1.72565e-78	170.069	non
MORC2	-0.535086	6.38236	-21.3983	1.62499e-79	1.95848e-78	169.971	down
NUDT2	0.473031	5.84222	21.404	1.50762e-79	1.821e-78	169.971	non
IL27RA	-0.355169	7.00327	-21.3909	1.79431e-79	2.15317e-78	169.95	non
PIGB	-0.480209	6.0698	-21.3938	1.72519e-79	2.07473e-78	169.872	non
ZMYM6	-0.472347	6.32702	-21.3742	2.23811e-79	2.67992e-78	169.643	non
EP400	-0.257632	6.2038	-21.3585	2.75549e-79	3.29231e-78	169.415	non
NDUFA2	0.450515	8.23305	21.2585	1.03722e-78	1.23662e-77	168.327	non
MICAL1	0.476276	7.34547	21.2128	1.90099e-78	2.25672e-77	167.623	non
AP1B1	-0.290695	5.84747	-21.2242	1.63507e-78	1.9452e-77	167.598	non
EIF4A3	-0.382682	7.52639	-21.1699	3.3556e-78	3.96649e-77	167.092	non
STX6	0.30145	6.63749	21.1786	2.98852e-78	3.54015e-77	167.08	non
COMMD3	0.546818	7.44103	21.1208	6.4204e-78	7.55694e-77	166.418	up
TMEM39B	-0.246011	5.52647	-21.1342	5.38148e-78	6.34763e-77	166.385	non
ANPEP	0.65528	7.55305	21.1164	6.8076e-78	7.97874e-77	166.372	up
STX2	-0.328996	5.35207	-21.1194	6.54299e-78	7.68489e-77	166.189	non
TNPO3	0.339114	6.58375	21.1009	8.35481e-78	9.77142e-77	166.046	non
NINJ2	-0.503293	7.37721	-21.0826	1.06366e-77	1.23358e-76	165.924	down
TUBGCP5	-0.314526	4.71261	-21.095	9.03093e-78	1.05399e-76	165.918	non
MRPL15	0.406837	6.60251	21.0909	9.54164e-78	1.11125e-76	165.915	non
SFTPD	-0.439192	3.81792	-21.0834	1.05232e-77	1.22299e-76	165.888	non
PAFAH1B1	-0.30888	7.62718	-21.073	1.20836e-77	1.39847e-76	165.823	non
QDPR	-0.396787	5.77457	-21.0553	1.5273e-77	1.76389e-76	165.363	non
S100A9	0.908284	11.603	20.9848	3.87672e-77	4.46792e-76	164.932	up
TNFRSF14	-0.411283	8.722	-20.9604	5.34874e-77	6.12613e-76	164.446	non
FASN	-0.448086	5.68502	-20.9681	4.82836e-77	5.55312e-76	164.208	non
MUM1	-0.361551	4.93822	-20.9629	5.17235e-77	5.9364e-76	164.148	non
SNAPC2	-0.355079	5.31312	-20.9549	5.75046e-77	6.57264e-76	164.02	non
MC1R	-0.317468	4.51905	-20.8965	1.24347e-76	1.41833e-75	163.325	non
ATP5I	0.430698	8.38904	20.8628	1.93901e-76	2.20712e-75	163.121	non
SLC9A3R1	-0.571682	8.05235	-20.8406	2.59636e-76	2.9493e-75	162.81	down
GLRX	0.426264	9.1864	20.8199	3.41371e-76	3.8698e-75	162.624	non
NDUFB7	0.546884	7.06987	20.8107	3.85158e-76	4.35725e-75	162.284	up
PIGT	-0.294155	6.22964	-20.7895	5.0943e-76	5.75136e-75	161.907	non
TSR2	-0.31745	6.50774	-20.7798	5.79004e-76	6.52353e-75	161.816	non
ENY2	0.377884	7.28334	20.7689	6.67938e-76	7.49499e-75	161.764	non
TSFM	-0.299927	5.69942	-20.7776	5.9599e-76	6.70125e-75	161.695	non
YEATS2	-0.28903	5.27884	-20.7568	7.83444e-76	8.7733e-75	161.411	non
RNASE6	0.58918	8.17193	20.7165	1.33275e-75	1.48645e-74	161.174	up
F12	0.39976	4.66734	20.7294	1.12432e-75	1.25652e-74	161.12	non
RUSC1	-0.35367	6.07101	-20.7134	1.38793e-75	1.54487e-74	160.889	non
MRPL13	0.277028	5.98442	20.7032	1.58682e-75	1.76271e-74	160.735	non
ATP5J	0.376037	8.37653	20.6616	2.74269e-75	3.04059e-74	160.476	non
BASP1	0.568377	9.37061	20.606	5.69891e-75	6.28015e-74	159.827	up
IER3	0.585198	7.14849	20.6183	4.84864e-75	5.35383e-74	159.765	up
LYRM1	0.377154	6.71421	20.6204	4.7124e-75	5.2138e-74	159.738	non
PPRC1	-0.29228	5.57509	-20.5926	6.79361e-75	7.47162e-74	159.258	non
ENTPD1	0.395573	6.52861	20.5727	8.82544e-75	9.68697e-74	159.086	non
TMCO1	0.553911	7.33856	20.5642	9.86952e-75	1.08115e-73	159.08	up
NPLOC4	0.309472	6.38051	20.5593	1.0525e-74	1.15068e-73	158.892	non
NAGPA	-0.352069	6.20304	-20.5335	1.47678e-74	1.61136e-73	158.544	non
C22orf29	-0.322085	4.49847	-20.523	1.69453e-74	1.84531e-73	158.421	non
SDCCAG3	-0.367627	5.98122	-20.5064	2.10662e-74	2.28956e-73	158.163	non
ATP6V1D	0.43949	6.73187	20.4404	5.00841e-74	5.43265e-73	157.379	non
FIS1	0.582261	7.74407	20.4208	6.47535e-74	7.01011e-73	157.252	up
LYZ	-0.619905	10.8625	-20.382	1.07751e-73	1.16422e-72	157	down
NKG7	-0.678833	9.57716	-20.3768	1.15277e-73	1.24311e-72	156.854	down
SRPRB	-0.320912	6.57826	-20.3635	1.3732e-73	1.47505e-72	156.365	non
CDC42EP2	-0.432655	4.96488	-20.3663	1.32328e-73	1.4242e-72	156.311	non
COL4A3BP	0.225257	6.40909	20.3613	1.41338e-73	1.51528e-72	156.304	non
BIN3	0.270197	6.28041	20.3484	1.67362e-73	1.79081e-72	156.118	non
PDHB	-0.413282	7.67169	-20.2856	3.80784e-73	4.0666e-72	155.49	non
OSBPL2	0.378126	6.93741	20.2744	4.40605e-73	4.68736e-72	155.237	non
ARSA	0.36708	5.39221	20.2783	4.18904e-73	4.46509e-72	155.139	non
ZNHIT1	0.461535	7.22258	20.2594	5.36503e-73	5.69661e-72	155.078	non
VAMP3	0.299905	8.0684	20.2327	7.61054e-73	8.05e-72	154.832	non
FIBP	-0.481906	7.13121	-20.2339	7.48912e-73	7.93675e-72	154.75	non
MKL1	0.3472	6.33298	20.2248	8.43981e-73	8.91012e-72	154.508	non
DNM2	0.310853	6.68869	20.1768	1.58034e-72	1.66523e-71	153.929	non
PDHA1	-0.305683	6.47086	-20.17	1.72552e-72	1.81475e-71	153.824	non
NUP107	-0.248332	6.23303	-20.1648	1.84737e-72	1.93921e-71	153.723	non
CFLAR	0.578687	8.75614	20.1371	2.65361e-72	2.78026e-71	153.648	up
KHSRP	-0.255966	6.47056	-20.123	3.18789e-72	3.32744e-71	153.21	non
PSEN2	-0.312504	4.31864	-20.1215	3.25445e-72	3.39052e-71	153.197	non
ABCC5	0.291796	5.97109	20.1251	3.10346e-72	3.24543e-71	153.167	non
CHRNA10	0.362745	4.65727	20.1125	3.65733e-72	3.80307e-71	153.045	non
PIK3R4	-0.206626	5.80895	-20.1069	3.93746e-72	4.08668e-71	152.919	non
G6PD	0.428803	6.89247	20.0968	4.48954e-72	4.65096e-71	152.913	non
BCL2L13	-0.411657	6.4393	-20.0648	6.8183e-72	7.05025e-71	152.45	non
DYNLT1	0.57988	8.51897	20.0359	9.94352e-72	1.02435e-70	152.309	up
RNF10	0.524124	7.1933	20.0427	9.09593e-72	9.38782e-71	152.248	up
PITPNB	-0.280351	7.08179	-20.0312	1.05721e-71	1.08506e-70	152.097	non
WRNIP1	-0.256238	6.27074	-20.0351	1.00403e-71	1.03239e-70	152.038	non
PYGL	0.53613	7.48425	20.0206	1.21281e-71	1.24246e-70	151.998	up
TCTA	0.277019	6.11638	20.015	1.30474e-71	1.33416e-70	151.749	non
MMRN1	0.37973	4.76342	20.0121	1.35524e-71	1.38325e-70	151.724	non
MZF1	-0.298607	5.81049	-20.0008	1.571e-71	1.59757e-70	151.54	non
ZNF324	0.436262	5.80985	20.0008	1.57057e-71	1.59757e-70	151.534	non
TTC1	0.247895	6.18853	19.9763	2.16087e-71	2.19339e-70	151.254	non
ITFG2	-0.293097	5.58658	-19.9563	2.80507e-71	2.84206e-70	150.945	non
RFTN1	-0.419289	7.55476	-19.9346	3.72209e-71	3.76427e-70	150.903	non
HMGCL	-0.223409	5.98998	-19.9237	4.28562e-71	4.32628e-70	150.555	non
DDX54	-0.197408	5.16141	-19.8795	7.61823e-71	7.67651e-70	149.948	non
DHX35	-0.267538	4.67467	-19.8685	8.79376e-71	8.84493e-70	149.856	non
TAF6L	-0.336069	5.16629	-19.8471	1.16177e-70	1.16641e-69	149.528	non
RIMS3	-0.295368	4.66197	-19.8421	1.23969e-70	1.24238e-69	149.515	non
HINT1	0.582173	9.31834	19.7762	2.91731e-70	2.9131e-69	149.005	up
BYSL	-0.332622	4.25574	-19.7785	2.83149e-70	2.83252e-69	148.748	non
COX7C	0.654851	9.93241	19.6681	1.18767e-69	1.18169e-68	147.649	up
SERPINB1	0.52526	8.32566	19.6715	1.13646e-69	1.13278e-68	147.562	up
CHD9	0.40328	7.20814	19.6285	1.98385e-69	1.96678e-68	146.877	non
GNLY	-0.70461	9.06669	-19.6085	2.57028e-69	2.53907e-68	146.829	down
PLAGL2	-0.357305	5.92883	-19.6318	1.90077e-69	1.8878e-68	146.766	non
PHKA2	0.354166	6.63482	19.6213	2.17817e-69	2.15557e-68	146.705	non
RARS2	0.224451	6.68326	19.5974	2.96838e-69	2.9271e-68	146.405	non
ATP6V1E1	0.421668	8.11568	19.5432	5.98629e-69	5.89256e-68	145.883	non
MAP7	-0.408067	4.03805	-19.5322	6.9051e-69	6.78491e-68	145.59	non
XPC	-0.378968	6.56225	-19.5274	7.34962e-69	7.20888e-68	145.496	non
PPP3CC	-0.354512	6.4274	-19.5261	7.47282e-69	7.31675e-68	145.46	non
RCN3	0.372962	5.24273	19.5145	8.67651e-69	8.48029e-68	145.223	non
STMN3	-0.654228	8.19369	-19.4728	1.48829e-68	1.44951e-67	144.999	down
GPR19	-0.376954	3.96155	-19.477	1.40933e-68	1.37503e-67	144.889	non
CSF1R	-0.717482	8.24512	-19.4298	2.59587e-68	2.51936e-67	144.45	down
FKBP5	0.718855	8.68107	19.426	2.72533e-68	2.64038e-67	144.424	up
HSPE1	0.337147	7.31457	19.4345	2.4429e-68	2.37507e-67	144.386	non
HTRA2	0.226105	6.05204	19.4103	3.33676e-68	3.22709e-67	143.909	non
EXOSC10	-0.260479	6.24888	-19.3937	4.13406e-68	3.99121e-67	143.727	non
RTN3	0.313054	7.7768	19.3736	5.35966e-68	5.15646e-67	143.66	non
SLC2A6	-0.479194	6.29622	-19.3795	4.97023e-68	4.79013e-67	143.555	non
PRKCH	-0.538205	7.96611	-19.3607	6.32984e-68	6.07929e-67	143.528	down
ARID3A	0.449028	6.76706	19.3347	8.84971e-68	8.47e-67	143.025	non
CTDP1	0.317742	5.2658	19.3349	8.83025e-68	8.46602e-67	142.903	non
UROS	-0.420904	6.58696	-19.3095	1.22612e-67	1.17149e-66	142.691	non
MRPL49	-0.348836	6.87748	-19.2912	1.55228e-67	1.48055e-66	142.494	non
SRRM1	-0.212332	8.03481	-19.2315	3.34744e-67	3.18727e-66	141.869	non
PHC2	0.286433	6.58759	19.2197	3.89805e-67	3.70515e-66	141.522	non
RPS27L	0.393771	8.28086	19.1709	7.29875e-67	6.92568e-66	141.109	non
CASP5	0.356649	4.931	19.1385	1.10759e-66	1.04918e-65	140.41	non
LCMT2	-0.244088	5.05925	-19.1304	1.2282e-66	1.16144e-65	140.284	non
TMUB2	0.226788	6.35226	19.1232	1.34774e-66	1.2723e-65	140.253	non
DDX24	-0.386659	7.54483	-19.1062	1.67744e-66	1.58085e-65	140.208	non
PUS7	-0.233408	4.80924	-19.1032	1.74256e-66	1.63943e-65	139.962	non
U2AF2	-0.3027	7.64591	-19.0478	3.55104e-66	3.32955e-65	139.47	non
HERC5	0.760525	6.99632	19.0513	3.39494e-66	3.18859e-65	139.413	up
TAX1BP1	0.440652	8.145	19.0302	4.45151e-66	4.16679e-65	139.29	non
C15orf39	-0.467739	7.05949	-18.9929	7.17555e-66	6.70526e-65	138.696	non
MED6	-0.305021	6.24539	-18.975	9.02762e-66	8.40754e-65	138.351	non
RPS15A	0.663044	11.3519	18.9375	1.45953e-65	1.34793e-64	138.349	up
TFCP2	-0.222228	5.69044	-18.9762	8.88975e-66	8.2931e-65	138.305	non
GSTO1	0.422458	8.68978	18.9412	1.39296e-65	1.29076e-64	138.207	non
KLHDC3	-0.408677	7.19437	-18.9519	1.21386e-65	1.12669e-64	138.188	non
ALG3	-0.205997	5.76892	-18.9548	1.16917e-65	1.08704e-64	138.038	non
GSK3B	0.327208	7.15	18.9395	1.42379e-65	1.31712e-64	138.009	non
THAP11	-0.394875	7.12429	-18.9365	1.47824e-65	1.36294e-64	137.982	non
ATP5C1	0.46963	8.61528	18.9027	2.27924e-65	2.09447e-64	137.708	non
RGS14	0.256407	6.33014	18.9159	1.92489e-65	1.7718e-64	137.596	non
ABHD5	0.41398	5.70735	18.8973	2.44305e-65	2.24129e-64	137.294	non
CHPT1	0.455579	7.13199	18.8474	4.62279e-65	4.23399e-64	136.829	non
KIAA1324	0.517295	6.15017	18.8448	4.78038e-65	4.37108e-64	136.664	up
ZNF133	-0.264039	4.90192	-18.8442	4.81623e-65	4.3966e-64	136.637	non
C1orf174	-0.349482	6.89336	-18.8221	6.38762e-65	5.82147e-64	136.489	non
RPA3	0.279965	6.57066	18.8214	6.4482e-65	5.86702e-64	136.422	non
BAG4	0.271249	4.96019	18.8174	6.78301e-65	6.16151e-64	136.297	non
MTX1	0.343012	6.67726	18.7837	1.04347e-64	9.43216e-64	135.955	non
GPR68	-0.268083	5.03241	-18.7895	9.69537e-65	8.79259e-64	135.926	non
OASL	0.500064	5.71555	18.7876	9.93097e-65	8.99151e-64	135.896	up
ATP6V0E1	0.326983	9.08733	18.7053	2.83747e-64	2.56067e-63	135.236	non
CCR3	-0.418644	5.01648	-18.6998	3.04459e-64	2.74311e-63	134.787	non
HSDL2	0.287888	5.5023	18.6847	3.69241e-64	3.32137e-63	134.575	non
RUVBL1	-0.20075	5.19263	-18.6479	5.9038e-64	5.30192e-63	134.111	non
GTF2B	0.340466	7.07149	18.6032	1.04232e-63	9.34539e-63	133.714	non
EEF2	-0.520986	10.4362	-18.574	1.51147e-63	1.34428e-62	133.678	down
SMARCA4	-0.430114	6.71494	-18.5936	1.17803e-63	1.05281e-62	133.557	non
RAC2	-0.452976	10.7535	-18.5622	1.75663e-63	1.55483e-62	133.548	non
BCL9	-0.261844	4.81717	-18.594	1.17197e-63	1.04908e-62	133.462	non
YIPF6	0.425832	6.55	18.5855	1.30627e-63	1.16553e-62	133.414	non
DPF2	-0.34555	6.77504	-18.5793	1.41338e-63	1.25907e-62	133.382	non
URM1	-0.32003	6.83828	-18.5678	1.63626e-63	1.4506e-62	133.244	non
ASTE1	-0.282042	4.9361	-18.5682	1.62799e-63	1.4456e-62	133.12	non
FRAT1	0.46108	6.74042	18.5595	1.81735e-63	1.60344e-62	133.111	non
CDK2AP2	-0.291426	6.38701	-18.5606	1.79374e-63	1.58514e-62	133.089	non
SRBD1	0.329007	5.83618	18.551	2.02665e-63	1.78242e-62	132.893	non
LRP5L	-0.315841	5.2499	-18.5511	2.0229e-63	1.78196e-62	132.881	non
IGBP1	0.252436	7.01747	18.5128	3.29053e-63	2.8894e-62	132.56	non
FFAR2	0.418465	6.40001	18.5067	3.55895e-63	3.12014e-62	132.394	non
DNAJA1	0.368397	8.47712	18.4821	4.85898e-63	4.25314e-62	132.347	non
FBN2	0.331699	5.30299	18.4425	8.03477e-63	7.02186e-62	131.505	non
GSPT2	-0.25734	5.41702	-18.4069	1.26307e-62	1.1021e-61	131.049	non
ZSCAN18	-0.415371	6.40379	-18.3772	1.83858e-62	1.60173e-61	130.771	non
GOT2	-0.333182	6.37325	-18.3609	2.2612e-62	1.96682e-61	130.559	non
DOCK2	-0.496346	8.3777	-18.3295	3.3638e-62	2.90758e-61	130.419	non
PREP	-0.28049	5.75112	-18.3473	2.68726e-62	2.33374e-61	130.313	non
SAE1	-0.441507	7.31778	-18.3263	3.50442e-62	3.02441e-61	130.255	non
CLIC3	-0.550046	6.39101	-18.3356	3.11535e-62	2.70127e-61	130.247	down
PFKP	-0.405684	6.23312	-18.3317	3.27361e-62	2.83405e-61	130.173	non
DDB1	-0.327851	7.18655	-18.3156	4.01515e-62	3.45979e-61	130.1	non
NSUN7	0.368411	4.04595	18.308	4.41855e-62	3.80147e-61	129.964	non
RPL39	0.509856	11.3304	18.2582	8.28901e-62	7.09826e-61	129.733	up
DHRS3	-0.336028	5.69664	-18.2797	6.3217e-62	5.43038e-61	129.457	non
LAS1L	-0.242555	5.75616	-18.2741	6.78362e-62	5.81813e-61	129.388	non
EIF2AK2	0.586787	7.218	18.2567	8.4493e-62	7.22435e-61	129.345	up
KCTD20	0.407121	7.31577	18.2468	9.58147e-62	8.16713e-61	129.235	non
EDC4	-0.338516	6.48281	-18.2516	9.01443e-62	7.69566e-61	129.194	non
RPL26L1	0.215179	6.33083	18.2407	1.03521e-61	8.81042e-61	129.024	non
IRAK3	0.560191	7.20431	18.2268	1.2334e-61	1.04811e-60	128.966	up
SHMT2	-0.374639	6.88388	-18.2247	1.26618e-61	1.07431e-60	128.912	non
SRM	-0.311436	6.08379	-18.1992	1.74755e-61	1.48047e-60	128.48	non
HLCS	-0.324938	4.03641	-18.1853	2.08315e-61	1.76208e-60	128.404	non
RRAS	-0.458195	6.2058	-18.1577	2.95056e-61	2.49199e-60	127.977	non
DSC2	0.441717	5.6185	18.1553	3.0412e-61	2.56462e-60	127.88	non
HGS	-0.351471	7.79823	-18.133	4.02731e-61	3.38074e-60	127.877	non
ASCC2	-0.634399	8.69408	-18.118	4.86765e-61	4.07998e-60	127.786	down
CHMP5	0.192533	6.85288	18.1359	3.88381e-61	3.27021e-60	127.778	non
RNMT	-0.368339	5.59582	-18.135	3.93012e-61	3.30417e-60	127.628	non
MYH3	-0.308197	4.10328	-18.1105	5.34889e-61	4.46979e-60	127.453	non
ARHGAP24	0.303652	4.63647	18.1087	5.47212e-61	4.56588e-60	127.364	non
CSTF2	-0.191088	5.14917	-18.1123	5.23118e-61	4.37805e-60	127.34	non
TFPT	0.228076	5.61026	18.1056	5.69239e-61	4.74252e-60	127.251	non
VCPIP1	0.311471	5.2647	18.0452	1.21747e-60	1.01279e-59	126.496	non
TAF2	-0.190046	6.17307	-17.9912	2.40167e-60	1.9949e-59	125.874	non
UBR2	0.469727	7.42856	17.9638	3.3887e-60	2.81054e-59	125.692	non
SNX17	-0.3609	7.70576	-17.9387	4.64403e-60	3.84017e-59	125.427	non
TNFRSF1B	-0.494753	9.09973	-17.919	5.94726e-60	4.89587e-59	125.324	non
ZNF33B	0.305349	5.59892	17.9515	3.95623e-60	3.27632e-59	125.317	non
TRABD	-0.40485	8.53987	-17.9222	5.71401e-60	4.71087e-59	125.312	non
CLEC5A	0.411462	4.95082	17.9286	5.27241e-60	4.35328e-59	125.064	non
CTBS	0.384206	6.81348	17.8518	1.38097e-59	1.13514e-58	124.206	non
RPS24	0.444923	10.913	17.815	2.19022e-59	1.7897e-58	124.15	non
POMT1	-0.249969	4.85388	-17.8321	1.76771e-59	1.45089e-58	123.857	non
RALGPS1	-0.273523	4.48199	-17.8213	2.02478e-59	1.65942e-58	123.773	non
SUOX	-0.246815	4.86044	-17.8167	2.14564e-59	1.75587e-58	123.662	non
IFIT1	0.612645	6.39186	17.813	2.24534e-59	1.83204e-58	123.661	up
MAP4K2	-0.38976	7.56648	-17.7842	3.21999e-59	2.61955e-58	123.479	non
NSDHL	-0.247993	4.90838	-17.7895	3.01317e-59	2.45491e-58	123.318	non
BRD9	-0.324725	6.54878	-17.7769	3.5292e-59	2.86689e-58	123.246	non
PPP4R1	0.340752	6.89321	17.7686	3.91629e-59	3.16738e-58	123.178	non
SLC9A8	0.321957	6.11589	17.77	3.84863e-59	3.11722e-58	123.091	non
SMU1	-0.2301	5.36602	-17.7722	3.74118e-59	3.03463e-58	123.072	non
ECHS1	-0.387895	6.76193	-17.7148	7.67113e-59	6.19513e-58	122.504	non
AIF1	0.468757	9.4088	17.6686	1.36524e-58	1.09616e-57	122.214	non
RAB22A	-0.277446	6.12409	-17.6881	1.07072e-58	8.63446e-58	122.081	non
DDAH2	0.28168	5.60715	17.6811	1.16914e-58	9.41443e-58	121.938	non
WDR59	-0.334164	6.3501	-17.6742	1.27432e-58	1.02464e-57	121.938	non
CD8A	-0.47459	7.49039	-17.6605	1.51067e-58	1.21117e-57	121.93	non
FBXO7	-0.502718	7.93934	-17.6445	1.84625e-58	1.47593e-57	121.784	down
LAT2	0.398314	7.72878	17.647	1.78951e-58	1.43264e-57	121.775	non
CST3	-0.573926	10.2554	-17.6012	3.16653e-58	2.52774e-57	121.452	down
CST7	0.511308	8.5225	17.5959	3.38094e-58	2.68341e-57	121.229	up
SUZ12	0.369837	8.05988	17.5979	3.30068e-58	2.62347e-57	121.204	non
TMEM51	-0.323475	4.26461	-17.5985	3.27288e-58	2.60512e-57	121.028	non
OCEL1	-0.344619	5.8851	-17.5995	3.23347e-58	2.57746e-57	120.952	non
ZNF281	0.376745	6.79814	17.5741	4.43553e-58	3.51538e-57	120.743	non
ARHGAP10	-0.246761	4.67179	-17.5575	5.45884e-58	4.32021e-57	120.459	non
STK17B	0.309307	6.97793	17.5321	7.4835e-58	5.91411e-57	120.248	non
SS18L2	0.478683	8.0878	17.4956	1.17824e-57	9.2849e-57	119.937	non
CORO7	0.449113	6.91624	17.4983	1.13901e-57	8.98858e-57	119.818	non
DPM3	0.38611	6.71631	17.4935	1.20953e-57	9.51796e-57	119.73	non
WDR45	0.218761	6.5808	17.4841	1.35903e-57	1.06641e-56	119.597	non
TBP	-0.228889	5.80863	-17.4852	1.34166e-57	1.05427e-56	119.522	non
SPATA20	-0.390111	5.64806	-17.4727	1.5672e-57	1.22801e-56	119.359	non
GFOD2	0.37381	5.45638	17.4578	1.88572e-57	1.4755e-56	119.163	non
UBQLN4	-0.336563	5.79431	-17.4426	2.27734e-57	1.77941e-56	118.996	non
ALDH6A1	-0.156815	5.30171	-17.4143	3.23594e-57	2.52485e-56	118.622	non
DENND2D	-0.346789	7.5024	-17.3936	4.18366e-57	3.25514e-56	118.616	non
C5AR1	0.445241	8.21089	17.381	4.88621e-57	3.79642e-56	118.533	non
VGLL4	-0.285271	5.96964	-17.3937	4.17551e-57	3.25337e-56	118.408	non
MTMR3	0.424711	6.80422	17.3705	5.5704e-57	4.32194e-56	118.219	non
MYBPC3	0.36276	4.81418	17.3699	5.60847e-57	4.34539e-56	118.127	non
TAP1	-0.585186	7.883	-17.3497	7.2092e-57	5.57001e-56	118.124	down
MCOLN1	0.420246	6.47451	17.3575	6.542e-57	5.06159e-56	118.012	non
KIAA0319L	0.274761	6.59703	17.3301	9.18217e-57	7.08449e-56	117.693	non
CA2	-0.439931	6.45789	-17.3176	1.07264e-56	8.2529e-56	117.534	non
ZER1	0.220831	5.49341	17.3247	9.81858e-57	7.56496e-56	117.514	non
METAP1	-0.221424	6.79605	-17.306	1.23856e-56	9.5163e-56	117.432	non
RNF31	0.358534	6.15311	17.2902	1.50477e-56	1.15456e-55	117.14	non
ITPK1	0.490826	6.85779	17.2717	1.89112e-56	1.44299e-55	117.007	non
BAG3	-0.272999	6.01812	-17.279	1.7278e-56	1.32385e-55	116.996	non
SPHK2	-0.319294	5.81402	-17.2746	1.82507e-56	1.39644e-55	116.921	non
FURIN	0.420189	5.87361	17.2731	1.85845e-56	1.42002e-55	116.9	non
TSTA3	0.389913	6.32629	17.2616	2.14311e-56	1.63301e-55	116.809	non
C17orf62	0.429835	7.85462	17.2098	4.06379e-56	3.09228e-55	116.379	non
NPL	0.399095	7.16076	17.1834	5.63159e-56	4.26766e-55	115.963	non
TOLLIP	0.275818	5.88711	17.1932	4.98709e-56	3.78964e-55	115.916	non
ADCY3	-0.328288	5.55776	-17.1847	5.54196e-56	4.2055e-55	115.794	non
GCDH	-0.248451	5.49822	-17.173	6.40322e-56	4.84577e-55	115.646	non
LILRA5	0.585022	7.18491	17.1478	8.74e-56	6.59614e-55	115.525	up
LRRC41	-0.283837	5.98067	-17.1559	7.90899e-56	5.97712e-55	115.475	non
ZNF148	0.422877	7.51193	17.1007	1.56039e-55	1.17443e-54	114.994	non
ATP5B	-0.349079	9.86965	-17.0774	2.07893e-55	1.55835e-54	114.955	non
PRKX	-0.247414	6.13172	-17.1111	1.37335e-55	1.03506e-54	114.941	non
EHD1	-0.495711	8.2593	-17.0619	2.51415e-55	1.8795e-54	114.623	non
RPGRIP1	0.315131	4.94589	17.0869	1.8493e-55	1.38999e-54	114.621	non
SLC25A22	-0.205893	4.97874	-17.0834	1.93087e-55	1.44933e-54	114.565	non
RNF44	-0.194699	7.79548	-17.0513	2.86624e-55	2.13693e-54	114.434	non
HSPBAP1	0.27224	6.48495	17.065	2.42148e-55	1.81267e-54	114.413	non
PRPF19	-0.35425	6.74738	-17.0549	2.74227e-55	2.04726e-54	114.339	non
MDH2	-0.32687	8.47893	-17.0278	3.82478e-55	2.84009e-54	114.225	non
SLC1A7	-0.325658	4.20517	-17.0417	3.22685e-55	2.40255e-54	114.16	non
VAMP5	0.44839	6.82973	17.0387	3.34589e-55	2.48783e-54	114.137	non
HBB	-0.363657	11.6284	-16.9835	6.58917e-55	4.86017e-54	113.928	non
TNK2	-0.341422	6.48119	-17.0206	4.1789e-55	3.09889e-54	113.881	non
CREG1	0.301715	8.18777	16.9933	5.84805e-55	4.33084e-54	113.761	non
ARHGEF18	-0.45828	8.47951	-16.9869	6.32039e-55	4.66814e-54	113.727	non
PCID2	-0.398863	7.19107	-16.9902	6.07187e-55	4.49059e-54	113.611	non
STOM	0.407994	8.0794	16.9802	6.861e-55	5.05394e-54	113.588	non
CDC42SE1	0.280416	7.75648	16.9492	1.00479e-54	7.37202e-54	113.171	non
GABARAPL1	0.562029	6.91323	16.9563	9.20331e-55	6.76131e-54	113.139	up
HIC2	-0.203527	5.93441	-16.9606	8.731e-55	6.42286e-54	113.072	non
SKAP1	-0.391573	6.96553	-16.9211	1.41716e-54	1.03838e-53	112.734	non
RAB9A	-0.256913	6.94719	-16.9171	1.48853e-54	1.08922e-53	112.679	non
KIF3B	-0.174579	5.48254	-16.9168	1.49428e-54	1.09199e-53	112.502	non
TBCA	0.296744	8.50806	16.8742	2.51779e-54	1.83268e-53	112.341	non
ELAC2	-0.221311	5.48124	-16.9033	1.76232e-54	1.28617e-53	112.338	non
ABR	-0.271374	6.75225	-16.8743	2.51341e-54	1.83191e-53	112.128	non
PCMT1	0.327854	7.71991	16.8585	3.05263e-54	2.21907e-53	112.057	non
GNG11	0.526861	7.67519	16.8492	3.41959e-54	2.47931e-53	111.936	up
ADARB1	-0.26152	5.75637	-16.8534	3.24754e-54	2.35766e-53	111.745	non
ARNT	0.287396	5.52878	16.8479	3.47278e-54	2.51458e-53	111.662	non
PPM1F	0.530648	8.03351	16.8192	4.93091e-54	3.56573e-53	111.614	up
PSMB1	0.487641	9.36583	16.8026	6.04627e-54	4.35521e-53	111.545	non
PEX5	-0.310038	5.85044	-16.8165	5.10107e-54	3.68396e-53	111.305	non
ZNF358	-0.371298	4.86814	-16.8153	5.17549e-54	3.73283e-53	111.298	non
ELL	-0.348086	5.41746	-16.8012	6.15058e-54	4.42458e-53	111.093	non
TAZ	0.228618	5.48009	16.7694	9.06591e-54	6.51333e-53	110.703	non
CXXC1	-0.376807	7.58617	-16.7461	1.2053e-53	8.64219e-53	110.684	non
PPP1R14B	0.341079	6.88331	16.746	1.20603e-53	8.64219e-53	110.571	non
IMPA2	-0.331088	7.47608	-16.7314	1.44162e-53	1.03037e-52	110.49	non
SNRPB	-0.451055	8.30184	-16.7228	1.60055e-53	1.14101e-52	110.486	non
NUP85	-0.240654	6.43421	-16.7421	1.26444e-53	9.04901e-53	110.471	non
CCDC53	0.278118	6.62507	16.7287	1.48998e-53	1.06356e-52	110.324	non
COPS5	0.261278	7.57844	16.7046	1.99824e-53	1.41721e-52	110.167	non
AGPAT2	0.242385	6.03002	16.7158	1.7425e-53	1.2406e-52	110.09	non
MRPS27	-0.216422	6.46372	-16.7097	1.87784e-53	1.33525e-52	110.08	non
SSBP2	-0.299564	5.5201	-16.7069	1.94219e-53	1.37923e-52	109.948	non
CHST12	-0.302647	6.38435	-16.6969	2.19568e-53	1.55424e-52	109.915	non
DPH2	-0.194101	5.21628	-16.6968	2.19707e-53	1.55424e-52	109.824	non
CD5	-0.374225	5.96759	-16.6837	2.57831e-53	1.82161e-52	109.703	non
CHMP1B	-0.436892	7.07896	-16.662	3.35871e-53	2.36693e-52	109.594	non
B3GALT4	0.377112	6.19975	16.6672	3.15179e-53	2.22394e-52	109.518	non
MLYCD	-0.247454	4.81988	-16.6604	3.42285e-53	2.40906e-52	109.42	non
HDHD3	-0.260793	5.01643	-16.6599	3.4437e-53	2.42066e-52	109.391	non
NCALD	-0.31017	5.43109	-16.6218	5.47535e-53	3.84386e-52	108.912	non
SLC7A6	-0.304155	6.59874	-16.6069	6.55951e-53	4.59914e-52	108.854	non
ZNF787	0.366293	6.64931	16.6028	6.89761e-53	4.83007e-52	108.798	non
THOC5	0.207482	5.94672	16.5954	7.54935e-53	5.27977e-52	108.619	non
ZBTB16	0.349397	5.91935	16.5857	8.4956e-53	5.93404e-52	108.498	non
BPHL	-0.231365	4.66895	-16.5769	9.45439e-53	6.59542e-52	108.427	non
SLC39A1	0.296772	6.02954	16.5646	1.09778e-52	7.64854e-52	108.254	non
ABCB1	-0.231804	5.17595	-16.563	1.11897e-52	7.78634e-52	108.203	non
ISOC1	-0.170957	5.95616	-16.518	1.93156e-52	1.34238e-51	107.689	non
UVRAG	-0.181317	5.89201	-16.5017	2.35444e-52	1.63422e-51	107.484	non
ANXA1	0.458803	9.90524	16.4609	3.85665e-52	2.65691e-51	107.449	non
SMA4	-0.441497	5.92182	-16.4882	2.77271e-52	1.92213e-51	107.331	non
JOSD1	-0.309099	6.40273	-16.4687	3.50788e-52	2.4257e-51	107.154	non
VWF	0.39022	4.79145	16.4719	3.37636e-52	2.33767e-51	107.153	non
ALDOC	-0.337361	6.20728	-16.4681	3.53514e-52	2.4415e-51	107.121	non
NADSYN1	0.23548	6.72961	16.4617	3.82067e-52	2.6354e-51	107.105	non
ZNF576	-0.267272	4.42363	-16.4321	5.46333e-52	3.75443e-51	106.714	non
ACTA2	-0.366276	5.41971	-16.4367	5.16669e-52	3.55499e-51	106.674	non
SCRIB	-0.163708	5.50067	-16.4226	6.13415e-52	4.21019e-51	106.501	non
ATG10	0.323117	5.2497	16.4196	6.3586e-52	4.35883e-51	106.471	non
UPP1	0.427377	7.10172	16.3876	9.36209e-52	6.40979e-51	106.262	non
SDF2L1	-0.351252	6.30061	-16.3777	1.05485e-51	7.21315e-51	106.044	non
SETD1A	-0.306489	5.32585	-16.3629	1.26204e-51	8.61924e-51	105.782	non
RHBDF2	-0.329731	6.68485	-16.3437	1.59034e-51	1.08481e-50	105.688	non
NFAT5	0.192886	6.39648	16.3264	1.96022e-51	1.33546e-50	105.427	non
YIPF1	0.344596	6.48451	16.2948	2.8681e-51	1.95158e-50	105.058	non
OPA1	-0.28103	4.37752	-16.2693	3.89914e-51	2.64988e-50	104.761	non
COX6A1	0.307419	8.64035	16.2399	5.55725e-51	3.77211e-50	104.679	non
GHITM	-0.286969	8.48736	-16.2222	6.87028e-51	4.65764e-50	104.461	non
DYM	0.197537	6.34018	16.2184	7.19172e-51	4.8696e-50	104.123	non
PAPOLA	0.340019	7.26245	16.203	8.65212e-51	5.83702e-50	104.07	non
TESC	-0.447259	7.8665	-16.1879	1.03779e-50	6.97576e-50	103.982	non
HAX1	0.26737	7.38128	16.1933	9.73108e-51	6.54895e-50	103.971	non
CRTAP	-0.191819	5.64611	-16.2114	7.82867e-51	5.2944e-50	103.969	non
GTF2H5	0.253092	6.89536	16.1982	9.16753e-51	6.1772e-50	103.96	non
MTMR10	-0.19619	6.05672	-16.2044	8.51577e-51	5.75204e-50	103.925	non
CTDSP2	-0.328831	8.58837	-16.1399	1.8469e-50	1.23843e-49	103.486	non
RBX1	0.344745	7.97907	16.1345	1.97054e-50	1.31974e-49	103.343	non
PRDX4	0.273756	6.48196	16.1512	1.61302e-50	1.08292e-49	103.336	non
WASF2	0.43462	7.7759	16.1268	2.15955e-50	1.44283e-49	103.225	non
CLCN7	-0.326713	7.64848	-16.1175	2.41641e-50	1.61249e-49	103.11	non
HEATR1	-0.229156	6.09306	-16.1338	1.98673e-50	1.32897e-49	103.086	non
ARL2BP	-0.309101	6.93855	-16.1128	2.55537e-50	1.70112e-49	102.956	non
PPP2R2B	-0.204999	4.97688	-16.1137	2.52842e-50	1.68521e-49	102.814	non
KIAA0586	-0.199673	4.79404	-16.1048	2.81103e-50	1.86906e-49	102.731	non
RALBP1	0.326202	6.60625	16.0831	3.64658e-50	2.42171e-49	102.54	non
CRK	0.262652	6.06334	16.0774	3.90398e-50	2.58954e-49	102.401	non
ARHGEF3	-0.37743	8.19683	-16.0392	6.16628e-50	4.08525e-49	102.243	non
UBA52	-0.345798	11.3628	-16.003	9.511e-50	6.24879e-49	102.079	non
CTSW	-0.412297	7.78565	-16.0258	7.24289e-50	4.78134e-49	102.035	non
F2RL1	-0.314809	5.13898	-16.0333	6.62023e-50	4.38076e-49	101.841	non
CKAP5	-0.164405	5.84941	-16.0302	6.87146e-50	4.54157e-49	101.819	non
EIF2B1	-0.287463	6.91839	-16.0126	8.47972e-50	5.5845e-49	101.757	non
ZNHIT3	0.273642	6.96113	16.0021	9.60664e-50	6.30415e-49	101.627	non
CUL2	-0.326713	5.51174	-16.0152	8.22099e-50	5.42056e-49	101.62	non
PRR3	-0.226659	4.72769	-16.0064	9.12951e-50	6.00528e-49	101.566	non
DGUOK	-0.273998	7.21353	-15.9877	1.14184e-49	7.48419e-49	101.503	non
MRPL33	0.316401	7.88418	15.9727	1.36496e-49	8.93602e-49	101.403	non
RBM22	-0.26831	7.90087	-15.9492	1.80766e-49	1.18064e-48	101.135	non
NUDT9	-0.155754	5.26247	-15.9682	1.43993e-49	9.41571e-49	101.058	non
PPBP	0.364466	10.2871	15.9031	3.13119e-49	2.03069e-48	100.806	non
GOLPH3L	0.219854	5.65098	15.9373	2.08242e-49	1.35848e-48	100.694	non
SF3B4	-0.284222	7.48618	-15.9117	2.82747e-49	1.84235e-48	100.637	non
MKNK1	0.298873	7.02241	15.9108	2.85612e-49	1.85883e-48	100.55	non
FANCE	-0.23685	4.80317	-15.9062	3.01733e-49	1.96144e-48	100.363	non
ZGPAT	-0.271695	5.9305	-15.9045	3.07969e-49	1.99963e-48	100.335	non
HLADPA1	-0.480706	10.0804	-15.8596	5.25723e-49	3.39358e-48	100.283	non
NDUFB2	0.552605	8.71664	15.849	5.96405e-49	3.84535e-48	100.024	up
COPS7A	-0.252385	6.70812	-15.8653	4.91121e-49	3.17393e-48	99.9739	non
PRPSAP2	-0.190655	6.50998	-15.8659	4.87446e-49	3.15386e-48	99.9512	non
SMUG1	0.260642	5.35318	15.8704	4.61961e-49	2.99247e-48	99.8959	non
NUPL2	-0.267347	5.70187	-15.8478	6.04834e-49	3.89516e-48	99.6398	non
NOV	0.357811	4.56135	15.8196	8.4531e-49	5.43119e-48	99.3834	non
ACACB	-0.233379	5.14976	-15.822	8.21877e-49	5.28677e-48	99.3282	non
WDR60	-0.245012	4.54023	-15.8141	9.02677e-49	5.79305e-48	99.3087	non
LRRC20	-0.306388	3.86929	-15.7827	1.31056e-48	8.36217e-48	99.0386	non
SLC31A1	0.311265	5.45069	15.7973	1.10206e-48	7.06443e-48	99.0286	non
WFS1	-0.211634	4.52076	-15.7898	1.20425e-48	7.71057e-48	99.0248	non
MS4A2	-0.275669	4.60396	-15.786	1.25932e-48	8.0445e-48	98.9668	non
HERC6	0.268514	5.61767	15.7868	1.2478e-48	7.98016e-48	98.9077	non
ARPC3	0.4133	9.89853	15.7452	2.04408e-48	1.29826e-47	98.9051	non
ZNF586	0.343162	6.76794	15.7548	1.82389e-48	1.16108e-47	98.663	non
YPEL1	-0.277399	5.50137	-15.7558	1.80322e-48	1.14924e-47	98.5399	non
GTF3C2	-0.22175	6.67215	-15.7396	2.18553e-48	1.38492e-47	98.4797	non
LGMN	-0.209922	4.89984	-15.7453	2.04224e-48	1.29826e-47	98.4446	non
ENO3	-0.269263	4.85917	-15.7401	2.17165e-48	1.3777e-47	98.3882	non
PRDX6	-0.280417	7.6674	-15.7034	3.35279e-48	2.12215e-47	98.1954	non
PGD	0.452489	8.67869	15.6858	4.12929e-48	2.61066e-47	98.0933	non
SLC1A5	0.303618	5.58013	15.6714	4.89585e-48	3.09176e-47	97.5437	non
PPP2R2A	0.194767	7.10356	15.6547	5.96429e-48	3.75791e-47	97.5342	non
TMEM11	0.18879	5.69283	15.6693	5.01878e-48	3.16578e-47	97.5236	non
NOTCH1	-0.435506	7.04283	-15.6504	6.27919e-48	3.95182e-47	97.4877	non
MRPS22	0.310449	6.93974	15.6403	7.0766e-48	4.44861e-47	97.3374	non
STARD3	0.22732	5.80707	15.6196	9.03018e-48	5.67025e-47	96.9467	non
TSSC1	-0.2029	5.72817	-15.6055	1.06695e-47	6.69205e-47	96.7789	non
ATF5	-0.346202	5.54929	-15.6001	1.13686e-47	7.12243e-47	96.7079	non
COQ6	-0.160353	4.80635	-15.5912	1.2634e-47	7.8973e-47	96.6405	non
LAX1	-0.302343	5.8677	-15.5912	1.26277e-47	7.8973e-47	96.6265	non
SVIL	0.257785	6.42058	15.5817	1.41329e-47	8.82431e-47	96.5732	non
FAM8A1	0.376268	7.78328	15.5631	1.758e-47	1.09519e-46	96.5473	non
IFITM1	0.497394	10.5849	15.5346	2.45962e-47	1.52712e-46	96.4824	non
MCM7	-0.269915	6.20436	-15.5749	1.52987e-47	9.54143e-47	96.4749	non
POLG	-0.315556	7.28804	-15.5439	2.2048e-47	1.37199e-46	96.2681	non
CAMKK2	0.449557	7.2008	15.5357	2.42874e-47	1.50964e-46	96.1445	non
TMBIM4	0.357288	9.50046	15.5095	3.3054e-47	2.04765e-46	96.099	non
GAPDH	0.337278	10.4274	15.4996	3.71401e-47	2.29307e-46	96.0612	non
TRPM6	0.282786	4.34778	15.5193	2.94727e-47	1.82784e-46	95.8739	non
DSCR3	-0.21433	6.40461	-15.5065	3.42503e-47	2.11938e-46	95.6978	non
CD2	-0.376621	8.43829	-15.4826	4.53741e-47	2.7859e-46	95.6919	non
ADORA3	0.333449	4.11141	15.4994	3.72362e-47	2.29644e-46	95.6785	non
ANG	0.336483	5.15177	15.5004	3.68054e-47	2.27495e-46	95.5448	non
CEBPE	0.303464	4.75846	15.4963	3.85964e-47	2.37768e-46	95.5436	non
DPM2	0.315988	6.12564	15.4915	4.08705e-47	2.51497e-46	95.4751	non
BARD1	0.230615	5.03883	15.4876	4.27639e-47	2.62855e-46	95.4029	non
EWSR1	-0.165403	7.90357	-15.4503	6.63112e-47	4.06689e-46	95.2487	non
DCP2	0.335477	7.69302	15.436	7.84495e-47	4.80601e-46	95.0459	non
ERH	0.273264	8.8971	15.3994	1.20411e-46	7.36037e-46	94.7575	non
GSPT1	0.39084	8.50906	15.3969	1.23976e-46	7.56994e-46	94.6866	non
ARHGAP26	0.274978	5.67882	15.426	8.82217e-47	5.3987e-46	94.6655	non
GRWD1	-0.230583	5.33687	-15.3937	1.28858e-46	7.85935e-46	94.2814	non
MAP3K8	-0.316713	5.8667	-15.3869	1.39526e-46	8.49127e-46	94.232	non
CPT2	-0.222214	5.43783	-15.3885	1.36832e-46	8.33653e-46	94.2214	non
FUCA1	-0.284655	6.55741	-15.3771	1.56523e-46	9.51523e-46	94.2069	non
TUBA1B	-0.504725	9.58073	-15.3208	3.02278e-46	1.83355e-45	93.9122	down
AGK	-0.249355	5.79051	-15.3376	2.48373e-46	1.50823e-45	93.6479	non
GLIPR1	0.448919	8.86143	15.2914	4.26112e-46	2.57623e-45	93.4925	non
ATP5O	0.525095	9.25494	15.2758	5.11222e-46	3.0807e-45	93.3474	up
BBS1	-0.178323	5.07353	-15.3086	3.48806e-46	2.11346e-45	93.3018	non
TAF10	0.246979	8.47678	15.2764	5.08014e-46	3.06471e-45	93.28	non
TNNI2	0.298229	4.32782	15.2967	4.00657e-46	2.42499e-45	93.2763	non
DOCK5	0.282789	6.354	15.2855	4.56507e-46	2.75698e-45	93.1	non
EPHX2	-0.402532	5.17048	-15.2752	5.14828e-46	3.09905e-45	92.9098	non
ZMIZ1	-0.384793	7.45472	-15.2495	6.95141e-46	4.17538e-45	92.8535	non
C11orf57	0.198485	5.92152	15.2673	5.65047e-46	3.39765e-45	92.8349	non
CCNI	-0.33723	10.2829	-15.1992	1.24884e-45	7.48494e-45	92.5564	non
ASPSCR1	-0.329115	6.07428	-15.2177	1.00745e-45	6.04471e-45	92.2859	non
SH2B3	-0.383043	7.7908	-15.1742	1.67064e-45	9.96975e-45	92.0235	non
PHF20L1	0.204828	5.87006	15.1902	1.38771e-45	8.30825e-45	91.934	non
CLN3	0.247123	6.21747	15.1828	1.51134e-45	9.0289e-45	91.8889	non
KNTC1	-0.241216	4.89708	-15.1842	1.48848e-45	8.90191e-45	91.8744	non
HLADOA	-0.24304	6.24108	-15.1565	2.05266e-45	1.22364e-44	91.5961	non
CTNNBL1	-0.223535	6.19754	-15.1512	2.1844e-45	1.30076e-44	91.5278	non
MEA1	0.206573	6.74734	15.1337	2.67476e-45	1.58764e-44	91.3957	non
WDR13	0.241054	6.31303	15.1344	2.65515e-45	1.57769e-44	91.3401	non
ATP8B4	0.273798	5.34444	15.137	2.57434e-45	1.53132e-44	91.298	non
RASA3	-0.191946	6.50672	-15.1214	3.08912e-45	1.83162e-44	91.225	non
BCAS4	-0.291813	5.27375	-15.1056	3.70891e-45	2.19675e-44	90.9351	non
HERC1	-0.230441	7.05645	-15.0826	4.84347e-45	2.86568e-44	90.8593	non
IDH3B	-0.263012	7.27308	-15.0714	5.51312e-45	3.25492e-44	90.7627	non
TINF2	-0.305231	7.84908	-15.0593	6.34167e-45	3.73611e-44	90.7005	non
MAK	-0.289407	4.28691	-15.0747	5.30684e-45	3.13648e-44	90.6958	non
TCIRG1	0.278974	7.67459	15.0617	6.17121e-45	3.63957e-44	90.6949	non
ZNF217	-0.317614	7.51907	-15.0509	6.99507e-45	4.10357e-44	90.5605	non
HCG4	-0.491244	7.31676	-15.0514	6.95039e-45	4.08318e-44	90.5424	non
TLR4	0.262661	6.63119	15.0581	6.4355e-45	3.78736e-44	90.5029	non
SMG7	0.243345	6.25312	15.0514	6.95291e-45	4.08318e-44	90.3727	non
CES2	-0.27725	6.21523	-15.0502	7.05205e-45	4.13262e-44	90.3636	non
PSMB7	0.273714	7.74215	15.0221	9.76101e-45	5.70803e-44	90.247	non
CRY2	-0.265972	5.17453	-15.034	8.50132e-45	4.97665e-44	90.1123	non
CMAS	-0.227581	5.34179	-15.0135	1.07776e-44	6.29584e-44	89.8694	non
NFE2	-0.384476	8.87924	-14.9772	1.64167e-44	9.55973e-44	89.8684	non
ENO1	-0.383958	9.57364	-14.9668	1.85072e-44	1.07431e-43	89.8122	non
STX8	0.195727	6.72643	14.9859	1.48316e-44	8.64579e-44	89.6859	non
FBXL6	-0.193165	5.08388	-14.9937	1.35599e-44	7.91283e-44	89.6529	non
RNF7	0.251401	7.34513	14.9727	1.72806e-44	1.00522e-43	89.6246	non
EXOSC2	-0.27928	4.60133	-14.9716	1.75129e-44	1.01766e-43	89.4583	non
TREM1	0.443756	6.533	14.966	1.86837e-44	1.08342e-43	89.4239	non
LXN	0.220489	5.05934	14.96	2.00165e-44	1.15949e-43	89.2721	non
MAST3	0.390224	7.43878	14.9361	2.63683e-44	1.52583e-43	89.214	non
CAPZA2	0.369158	8.5962	14.9187	3.22394e-44	1.85973e-43	89.1569	non
ISG15	0.625997	7.8656	14.9189	3.21532e-44	1.8567e-43	89.0696	up
MAPK13	0.282316	5.81334	14.9211	3.13486e-44	1.81213e-43	88.8217	non
ARPC5L	-0.284475	7.46631	-14.8993	4.03261e-44	2.32379e-43	88.8073	non
PTPN1	-0.347633	6.83752	-14.8964	4.16794e-44	2.39678e-43	88.6848	non
LRRC14	-0.24978	5.08837	-14.8988	4.05478e-44	2.33413e-43	88.5611	non
SUPT4H1	0.333258	7.47425	14.878	5.14934e-44	2.955e-43	88.5534	non
SMAD7	-0.215567	5.29493	-14.8809	4.98093e-44	2.86132e-43	88.3447	non
MAP3K3	0.241576	6.66353	14.8623	6.1732e-44	3.53887e-43	88.255	non
PYGB	-0.33458	5.4662	-14.8573	6.53488e-44	3.74233e-43	88.0765	non
PLAUR	0.343511	6.91503	14.8409	7.89827e-44	4.51843e-43	88.0452	non
NSMAF	0.299962	7.38128	14.8268	9.28508e-44	5.30631e-43	87.9536	non
MTMR14	-0.229034	7.41108	-14.8228	9.71735e-44	5.5419e-43	87.9225	non
TIMM10	0.299799	6.51427	14.8266	9.30775e-44	5.31377e-43	87.8231	non
DEDD	0.188716	6.47492	14.821	9.92669e-44	5.65545e-43	87.7551	non
POMGNT1	-0.232641	5.49535	-14.8188	1.01818e-43	5.79483e-43	87.633	non
USP5	-0.329823	5.84012	-14.7903	1.41167e-43	8.02604e-43	87.3336	non
MYH9	-0.308238	9.28456	-14.7257	2.96094e-43	1.67655e-42	87.0244	non
IRS2	0.344091	7.36457	14.7403	2.50406e-43	1.42076e-42	86.962	non
FBXO31	-0.264171	5.54009	-14.7544	2.13201e-43	1.21091e-42	86.8987	non
BTG2	-0.416731	7.36201	-14.7291	2.84902e-43	1.61483e-42	86.8478	non
EMP3	-0.355784	9.635	-14.7057	3.72208e-43	2.09893e-42	86.8287	non
TBL1X	0.318852	7.82802	14.7101	3.54119e-43	2.00101e-42	86.6797	non
POLR1D	0.375432	8.4095	14.6875	4.58457e-43	2.58267e-42	86.492	non
CTDSPL	0.410094	5.64251	14.7161	3.30599e-43	1.87001e-42	86.4644	non
ZBTB25	-0.177053	5.33906	-14.71	3.54597e-43	2.00167e-42	86.3875	non
RPL19	-0.390101	11.2313	-14.6262	9.23127e-43	5.16876e-42	86.0548	non
ATP5G2	-0.369468	9.08987	-14.6338	8.46236e-43	4.74304e-42	85.9619	non
ZNF516	0.214432	5.39407	14.6664	5.83588e-43	3.28424e-42	85.891	non
RFXAP	-0.136815	5.31891	-14.6637	6.01797e-43	3.38327e-42	85.8604	non
SH2D3C	-0.297019	7.35504	-14.6381	8.05958e-43	4.52646e-42	85.8086	non
ACSL5	-0.170453	6.31437	-14.6372	8.14877e-43	4.57191e-42	85.6417	non
BICD2	-0.28919	7.23176	-14.6123	1.08247e-42	6.04873e-42	85.4972	non
CACNA2D2	-0.21053	4.90802	-14.62	9.91371e-43	5.54526e-42	85.3946	non
HPCAL4	-0.249743	4.62904	-14.6048	1.17863e-42	6.57277e-42	85.2605	non
NDUFAF1	0.191858	5.63316	14.6094	1.1189e-42	6.24599e-42	85.2467	non
NTAN1	0.214253	6.18726	14.6036	1.19478e-42	6.65611e-42	85.2363	non
FPR1	0.389741	10.4463	14.5552	2.07309e-42	1.14454e-41	85.18	non
JUP	-0.32096	5.08994	-14.6016	1.22247e-42	6.80353e-42	85.1679	non
SF3B5	0.265922	8.01181	14.5732	1.69014e-42	9.34984e-42	85.1472	non
PAPSS1	0.20772	7.25902	14.5814	1.53921e-42	8.54053e-42	85.1406	non
MKRN1	0.360679	9.64919	14.5541	2.09858e-42	1.15746e-41	85.0992	non
BBS10	-0.221413	4.63752	-14.5836	1.49999e-42	8.33129e-42	85.0194	non
TAGLN	-0.301181	5.59635	-14.5858	1.46416e-42	8.14044e-42	84.9829	non
RAD54L2	-0.326766	5.30467	-14.5787	1.58746e-42	8.7994e-42	84.897	non
TARBP1	-0.231608	5.70835	-14.5767	1.62286e-42	8.98662e-42	84.8859	non
HCFC1R1	0.216878	5.89074	14.57	1.75221e-42	9.68353e-42	84.8201	non
MAN2B2	-0.347501	7.00382	-14.5467	2.28391e-42	1.25717e-41	84.7212	non
DDX56	-0.245065	6.36712	-14.5475	2.26308e-42	1.24695e-41	84.6334	non
YWHAH	-0.388404	7.75632	-14.5167	3.21392e-42	1.76208e-41	84.4864	non
TGFA	0.248071	5.0214	14.5386	2.50576e-42	1.37792e-41	84.4645	non
NPC1	-0.197043	5.83901	-14.5278	2.83208e-42	1.55582e-41	84.3424	non
RFX5	-0.188123	7.12862	-14.5108	3.43599e-42	1.88197e-41	84.3293	non
HSBP1	0.366812	7.80608	14.5011	3.83325e-42	2.09748e-41	84.3038	non
AKAP8L	0.216703	6.08953	14.5183	3.15525e-42	1.73163e-41	84.2565	non
VASP	0.276592	7.7928	14.4825	4.73623e-42	2.58391e-41	84.0929	non
CD58	0.170442	7.21504	14.485	4.60502e-42	2.51481e-41	84.0432	non
RHOC	-0.371882	6.17684	-14.4972	4.01093e-42	2.19254e-41	84.0404	non
RYBP	0.476226	7.73174	14.4671	5.6436e-42	3.07287e-41	83.9072	non
PEX6	-0.352081	4.4905	-14.4677	5.60267e-42	3.05359e-41	83.7269	non
FOXJ3	-0.223409	6.945	-14.4453	7.22091e-42	3.92398e-41	83.5626	non
NFKBIE	-0.203575	5.303	-14.4488	6.94354e-42	3.77696e-41	83.4248	non
RYK	-0.214864	6.21862	-14.4354	8.08303e-42	4.38816e-41	83.3438	non
PAF1	-0.248848	6.33584	-14.4167	9.98582e-42	5.41584e-41	83.1503	non
CXCL1	0.292464	4.8982	14.3991	1.21842e-41	6.60166e-41	82.9056	non
H2AFJ	0.281046	6.91853	14.3831	1.46002e-41	7.88753e-41	82.8469	non
OSGEP	-0.213494	5.7595	-14.396	1.26264e-41	6.8279e-41	82.8459	non
PES1	-0.168953	5.21733	-14.3965	1.25561e-41	6.7965e-41	82.8374	non
SF3A2	-0.348298	7.11956	-14.3725	1.64705e-41	8.88927e-41	82.7705	non
EML3	-0.355311	7.46712	-14.3566	1.97015e-41	1.0602e-40	82.6416	non
SORT1	0.265306	6.94431	14.3639	1.81411e-41	9.78137e-41	82.6349	non
SEC11A	0.216791	8.59753	14.3423	2.31614e-41	1.24397e-40	82.6095	non
XPNPEP1	-0.283522	7.25319	-14.35	2.12171e-41	1.14065e-40	82.5364	non
ASNS	-0.336273	6.01956	-14.3596	1.90528e-41	1.02629e-40	82.4668	non
TMEM5	-0.126734	5.76571	-14.3405	2.36239e-41	1.26758e-40	82.2205	non
SLC22A5	-0.194307	4.80263	-14.3341	2.54095e-41	1.36207e-40	82.1769	non
ANKMY1	-0.234003	4.65813	-14.3296	2.67116e-41	1.43048e-40	82.1475	non
TNPO2	-0.247114	6.62646	-14.308	3.40895e-41	1.82382e-40	81.9694	non
S100A6	0.529032	10.7938	14.2596	5.87625e-41	3.12571e-40	81.8785	up
NQO1	-0.225077	4.20321	-14.2965	3.88033e-41	2.07201e-40	81.8456	non
POLR3B	-0.150151	5.26122	-14.3051	3.52287e-41	1.88295e-40	81.8077	non
EXOC3	0.266923	6.24553	14.2859	4.37402e-41	2.33337e-40	81.6566	non
MPHOSPH10	-0.237202	5.92822	-14.2791	4.72266e-41	2.51693e-40	81.5497	non
SCMH1	-0.172125	4.96308	-14.2701	5.22675e-41	2.7829e-40	81.438	non
LPGAT1	0.199798	7.18762	14.2529	6.33939e-41	3.36883e-40	81.4268	non
ACTB	-0.31394	11.7623	-14.2038	1.10083e-40	5.81642e-40	81.3347	non
ZHX3	-0.208323	4.40144	-14.2471	6.76856e-41	3.59344e-40	81.261	non
SPATA7	-0.25906	3.95236	-14.2395	7.36796e-41	3.90792e-40	81.2458	non
NCAPD3	-0.154787	5.18404	-14.2316	8.0512e-41	4.26621e-40	80.9882	non
RIPK1	-0.2595	6.20015	-14.2247	8.70341e-41	4.6074e-40	80.9751	non
SLAMF1	-0.224946	5.33877	-14.2142	9.79203e-41	5.17873e-40	80.7882	non
IFIT3	0.485173	7.17	14.1965	1.19454e-40	6.30553e-40	80.788	non
VNN2	0.438007	8.3572	14.1656	1.68898e-40	8.89005e-40	80.6008	non
ARHGDIB	-0.268721	11.4962	-14.1349	2.38188e-40	1.24425e-39	80.5476	non
YPEL5	0.284328	8.61828	14.1579	1.84111e-40	9.68159e-40	80.5467	non
TACC3	0.337703	6.61245	14.1818	1.40837e-40	7.4201e-40	80.5427	non
CRIPT	0.28525	6.1176	14.1854	1.35236e-40	7.13177e-40	80.5156	non
RRAGC	0.233951	7.21539	14.1421	2.19921e-40	1.15209e-39	80.1915	non
BECN1	-0.166788	6.89761	-14.1441	2.14996e-40	1.12842e-39	80.1741	non
POGK	-0.217449	6.81129	-14.142	2.20173e-40	1.15232e-39	80.1384	non
NAT8B	0.307911	4.78136	14.1505	2.00065e-40	1.05105e-39	80.1347	non
E2F4	-0.296667	7.13653	-14.1366	2.33715e-40	1.22203e-39	80.1302	non
AP2B1	0.187423	6.69729	14.1421	2.19734e-40	1.15209e-39	80.1149	non
AQR	-0.138972	6.57926	-14.1324	2.44994e-40	1.27859e-39	79.9956	non
CEP63	0.331947	6.31093	14.1268	2.60859e-40	1.36011e-39	79.8861	non
POLG2	-0.156737	5.42875	-14.1264	2.61919e-40	1.36435e-39	79.8071	non
EEF1E1	0.192624	6.09048	14.1221	2.74868e-40	1.43045e-39	79.807	non
COX5B	0.381991	9.1793	14.0804	4.38085e-40	2.27771e-39	79.7389	non
SLC25A5	-0.414132	9.5638	-14.0537	5.90248e-40	3.05735e-39	79.4878	non
MNDA	0.37868	10.094	14.0455	6.46741e-40	3.34684e-39	79.4344	non
INPP1	-0.223699	5.82798	-14.0758	4.61483e-40	2.39711e-39	79.2681	non
ETS1	-0.455808	9.86544	-14.0236	8.26127e-40	4.27115e-39	79.1808	non
ATOX1	0.258005	6.61362	14.0571	5.68554e-40	2.94774e-39	79.1545	non
TRAP1	-0.22609	5.63674	-14.0604	5.47749e-40	2.84254e-39	79.0814	non
CSF3R	0.384809	8.75001	14.0089	9.73371e-40	5.02303e-39	78.9016	non
TMEM131	-0.23073	7.46055	-14.0116	9.4407e-40	4.87637e-39	78.7849	non
HCP5	-0.325796	7.91712	-13.9915	1.18118e-39	6.0784e-39	78.6237	non
ARFGAP3	-0.160273	6.7228	-13.9997	1.07739e-39	5.54948e-39	78.5425	non
NME1	0.21805	6.28538	14.003	1.0392e-39	5.35776e-39	78.5074	non
KRT23	0.288025	4.53108	13.9876	1.23269e-39	6.33761e-39	78.3611	non
RPS27	0.597089	11.6842	13.9289	2.3675e-39	1.20377e-38	78.2687	up
TRIOBP	0.236713	6.59348	13.9748	1.42278e-39	7.29455e-39	78.2384	non
RTN1	-0.16577	6.24605	-13.9785	1.36437e-39	7.00157e-39	78.238	non
HMBS	0.275767	5.76351	13.9807	1.33199e-39	6.84173e-39	78.2006	non
TSEN2	-0.221709	4.95223	-13.9724	1.45999e-39	7.47839e-39	78.1227	non
PLCB2	0.391999	7.62213	13.9498	1.8787e-39	9.59646e-39	78.1105	non
PSMC6	0.176186	7.10376	13.9541	1.79074e-39	9.16409e-39	78.0873	non
GAK	-0.178695	7.39976	-13.9406	2.07971e-39	1.06134e-38	77.9891	non
LSM7	0.378665	7.59301	13.9346	2.22217e-39	1.133e-38	77.9396	non
CD38	-0.225938	5.10083	-13.9517	1.83841e-39	9.39935e-39	77.8785	non
GAMT	-0.194598	4.75953	-13.9338	2.2417e-39	1.1419e-38	77.721	non
PSTPIP2	0.346153	6.47642	13.9291	2.36271e-39	1.20244e-38	77.7145	non
WDR6	-0.314002	7.14314	-13.9131	2.82222e-39	1.43234e-38	77.6508	non
IFITM3	0.500864	9.58438	13.8873	3.75581e-39	1.90093e-38	77.6366	up
UBB	-0.323696	11.0567	-13.8715	4.47547e-39	2.2631e-38	77.5974	non
NOL6	-0.235504	5.41244	-13.924	2.50109e-39	1.27053e-38	77.5608	non
ALG8	-0.129785	5.95364	-13.9117	2.86725e-39	1.45386e-38	77.4605	non
LONP1	-0.224109	6.20536	-13.8951	3.44628e-39	1.74586e-38	77.3111	non
CUTC	0.166232	6.32578	13.8675	4.67662e-39	2.36265e-38	77.0157	non
SLC25A11	0.161788	6.2633	13.8645	4.83587e-39	2.44088e-38	76.9739	non
MDC1	-0.226733	5.72013	-13.8593	5.12245e-39	2.58317e-38	76.861	non
C1orf112	-0.24264	4.06482	-13.8434	6.10869e-39	3.07771e-38	76.8289	non
FBP1	-0.341015	6.56302	-13.8296	7.11748e-39	3.5827e-38	76.6431	non
RIT1	0.166322	6.44503	13.816	8.26575e-39	4.15314e-38	76.4657	non
RABEP1	0.234386	6.37656	13.8127	8.57596e-39	4.3051e-38	76.4181	non
SNIP1	-0.235674	5.63768	-13.8182	8.07409e-39	4.06054e-38	76.4021	non
TNIP2	0.203731	6.76295	13.8047	9.37062e-39	4.69975e-38	76.3871	non
CYB5B	-0.301684	6.81056	-13.7911	1.08854e-38	5.45453e-38	76.2561	non
FAM111A	0.259407	7.10435	13.7728	1.33242e-38	6.65247e-38	76.0876	non
CTRL	0.225527	5.17951	13.7857	1.15552e-38	5.78494e-38	76.0459	non
CEACAM3	0.33389	6.08332	13.7805	1.22338e-38	6.11912e-38	76.0245	non
MFN2	0.317398	6.50892	13.7697	1.37786e-38	6.86694e-38	75.9637	non
ZSCAN16	0.179784	5.38014	13.7732	1.32596e-38	6.62622e-38	75.8988	non
DHX38	-0.168407	5.7531	-13.7709	1.36029e-38	6.78553e-38	75.8899	non
KPNA1	0.231376	6.16952	13.7598	1.53817e-38	7.659e-38	75.8083	non
BST1	0.305191	6.52511	13.7501	1.71101e-38	8.51198e-38	75.7507	non
GRINA	0.361659	7.29003	13.733	2.06473e-38	1.02348e-37	75.6775	non
RRM1	-0.222334	6.58353	-13.7393	1.92633e-38	9.57452e-38	75.6518	non
MAN1C1	-0.219006	6.15169	-13.7376	1.96437e-38	9.75485e-38	75.5707	non
CFD	-0.525877	8.88701	-13.7026	2.88752e-38	1.42878e-37	75.5542	down
SIGLEC9	0.241212	5.15926	13.737	1.97662e-38	9.80687e-38	75.5134	non
PAOX	-0.160742	4.7748	-13.7247	2.26333e-38	1.12093e-37	75.4168	non
TNNC2	0.27306	4.3623	13.7003	2.95875e-38	1.46272e-37	75.2224	non
XPO6	0.367816	8.68607	13.6675	4.24294e-38	2.08825e-37	75.1378	non
PCCA	-0.205634	4.88182	-13.6899	3.31811e-38	1.63891e-37	75.0208	non
SLC25A10	-0.289154	3.69287	-13.6717	4.05098e-38	1.99555e-37	75.0044	non
PTK2B	0.213478	6.52182	13.6768	3.83206e-38	1.88939e-37	74.9488	non
SARM1	-0.201612	4.85341	-13.6792	3.73247e-38	1.84193e-37	74.9073	non
MLLT10	-0.131893	5.86097	-13.6618	4.51814e-38	2.22172e-37	74.7046	non
SQRDL	0.233122	7.33879	13.6372	5.91867e-38	2.90782e-37	74.6389	non
PNMA3	-0.300566	5.36747	-13.6369	5.9362e-38	2.91385e-37	74.4083	non
SPTAN1	-0.328033	6.94748	-13.6194	7.19584e-38	3.51966e-37	74.3974	non
SLC25A15	-0.178338	4.82176	-13.6295	6.43625e-38	3.1565e-37	74.3694	non
CLEC4E	0.268507	6.68677	13.6183	7.28171e-38	3.55852e-37	74.3333	non
CLPP	-0.27374	5.96155	-13.6252	6.75054e-38	3.30478e-37	74.3192	non
TFG	-0.192481	6.77615	-13.6143	7.60665e-38	3.71403e-37	74.3125	non
HIBCH	-0.168423	5.57703	-13.6272	6.60393e-38	3.23587e-37	74.3044	non
HTATIP2	0.182827	6.92249	13.607	8.23975e-38	4.0196e-37	74.2473	non
IFNGR1	0.395693	9.29792	13.5776	1.13657e-37	5.53478e-37	74.218	non
GIMAP4	-0.378036	9.23223	-13.5524	1.49745e-37	7.26022e-37	73.9475	non
NRBP1	0.16574	5.85278	13.5826	1.07591e-37	5.24397e-37	73.8356	non
POLE3	-0.324873	7.61942	-13.5576	1.41463e-37	6.86467e-37	73.8214	non
NME4	0.309229	6.18428	13.5739	1.18406e-37	5.76098e-37	73.7773	non
STARD5	-0.237784	4.32242	-13.5673	1.27248e-37	6.18032e-37	73.7655	non
SKAP2	0.304721	7.93156	13.5477	1.57658e-37	7.63718e-37	73.743	non
CKS1B	0.218419	5.4205	13.5733	1.19112e-37	5.79024e-37	73.7128	non
RNASET2	-0.348587	10.666	-13.5183	2.17244e-37	1.04686e-36	73.7047	non
COX6B1	0.350884	8.89319	13.5314	1.88284e-37	9.08887e-37	73.6771	non
ICAM2	-0.337284	7.87152	-13.5324	1.86351e-37	9.01131e-37	73.5802	non
EMD	-0.339493	6.91285	-13.5387	1.73895e-37	8.41631e-37	73.5141	non
ATG7	0.330313	6.45102	13.5316	1.87884e-37	9.07748e-37	73.354	non
PSENEN	0.176878	6.024	13.5311	1.88995e-37	9.11526e-37	73.2934	non
USP11	-0.16437	6.19507	-13.5165	2.21654e-37	1.06718e-36	73.1623	non
IQGAP1	0.263893	8.54967	13.4818	3.23567e-37	1.54842e-36	73.1026	non
CUL1	-0.26117	5.51895	-13.5103	2.36947e-37	1.13982e-36	73.0319	non
ZBTB3	-0.19506	4.92569	-13.4994	2.66947e-37	1.28302e-36	72.9395	non
PLA2G4C	-0.295428	4.33358	-13.4899	2.96066e-37	1.4205e-36	72.9222	non
CBR1	-0.199527	4.66862	-13.4938	2.83654e-37	1.36213e-36	72.9146	non
ZNF207	-0.199062	7.65685	-13.47	3.67705e-37	1.75812e-36	72.8731	non
DDX23	-0.211313	6.50966	-13.4852	3.11672e-37	1.49279e-36	72.8691	non
NANS	0.178825	5.975	13.4858	3.09595e-37	1.48413e-36	72.7963	non
PRPF8	-0.279349	8.01949	-13.4451	4.82301e-37	2.30008e-36	72.6513	non
SPATA2L	0.278434	5.77382	13.4644	3.9098e-37	1.86779e-36	72.5436	non
DECR2	-0.25477	4.63318	-13.459	4.14383e-37	1.97788e-36	72.5418	non
ITGB2	-0.365972	11.0673	-13.3987	7.9855e-37	3.78866e-36	72.4427	non
GNB1	-0.239407	9.10851	-13.4108	7.00126e-37	3.32455e-36	72.3993	non
IGF2R	0.45787	8.77616	13.3955	8.25929e-37	3.90516e-36	72.1919	non
BRMS1	0.183823	6.31031	13.4225	6.16684e-37	2.93336e-36	72.1529	non
MAPK7	-0.225058	4.61671	-13.4204	6.30324e-37	2.99567e-36	72.1272	non
DCPS	-0.174252	5.55514	-13.4246	6.02411e-37	2.8704e-36	72.1027	non
FARSA	-0.189396	5.62176	-13.4225	6.16115e-37	2.93318e-36	72.0841	non
USP9X	0.170909	7.1362	13.3968	8.14657e-37	3.86177e-36	71.9996	non
FBLN5	-0.22931	4.59391	-13.3962	8.19857e-37	3.88309e-36	71.8689	non
PMPCA	-0.196211	6.03982	-13.3956	8.25217e-37	3.90513e-36	71.8345	non
KCTD15	-0.190232	4.78752	-13.3886	8.90645e-37	4.20755e-36	71.7583	non
AP4E1	-0.147005	5.45128	-13.3876	9.00578e-37	4.25085e-36	71.6989	non
ACOX3	-0.182811	4.91201	-13.3709	1.07946e-36	5.09087e-36	71.5503	non
DERL2	0.191131	6.32552	13.3413	1.48668e-36	7.0054e-36	71.2789	non
LPP	0.299138	7.30621	13.3266	1.74308e-36	8.20657e-36	71.2657	non
L2HGDH	-0.209244	4.24868	-13.3184	1.90556e-36	8.96391e-36	71.0835	non
SAMSN1	0.249882	7.09337	13.3075	2.14199e-36	1.0059e-35	71.0294	non
OGFOD1	-0.118135	5.97619	-13.3159	1.95729e-36	9.19942e-36	70.9653	non
HSPB1	-0.328961	6.67854	-13.3002	2.3192e-36	1.08727e-35	70.8995	non
ANKFY1	-0.141108	6.43389	-13.2997	2.33064e-36	1.09171e-35	70.8537	non
ACTR1B	-0.185167	6.69624	-13.2945	2.46706e-36	1.15366e-35	70.8371	non
CRBN	0.202769	7.53977	13.2834	2.77828e-36	1.297e-35	70.837	non
PCCB	-0.190599	5.79222	-13.3046	2.21193e-36	1.03786e-35	70.8252	non
HEBP2	0.369413	7.58731	13.2809	2.85712e-36	1.33156e-35	70.8129	non
PRDX3	-0.235776	7.36453	-13.2814	2.83985e-36	1.32463e-35	70.7991	non
AKR1B1	-0.311442	7.4662	-13.2793	2.9067e-36	1.35352e-35	70.7917	non
RPL38	-0.286248	11.4572	-13.2391	4.48352e-36	2.07555e-35	70.7565	non
SIRPG	-0.214777	5.70119	-13.2966	2.41002e-36	1.12794e-35	70.7324	non
LAMA5	-0.244567	4.29481	-13.2852	2.72628e-36	1.2738e-35	70.7191	non
CEBPA	0.36116	7.17853	13.2659	3.35593e-36	1.55747e-35	70.5936	non
UCHL3	0.13434	5.87426	13.2752	3.03553e-36	1.41233e-35	70.5133	non
PIK3CG	0.228342	6.10504	13.2694	3.23373e-36	1.50328e-35	70.4758	non
SSH3	0.189523	5.17462	13.269	3.24822e-36	1.50875e-35	70.4314	non
TRIM21	0.32165	6.70351	13.2472	4.10741e-36	1.90462e-35	70.3208	non
PTEN	0.249012	8.08802	13.2182	5.61493e-36	2.59281e-35	70.2082	non
ZNF692	0.16048	5.66454	13.2452	4.19845e-36	1.94521e-35	70.1727	non
ATP6V0A1	0.309076	7.09851	13.2196	5.52825e-36	2.55491e-35	70.0855	non
FASTKD3	-0.131265	5.68843	-13.2239	5.27928e-36	2.44189e-35	69.9491	non
HSD17B8	-0.24714	5.69742	-13.2169	5.69273e-36	2.62654e-35	69.8773	non
TMEM159	-0.173032	4.87233	-13.1821	8.27474e-36	3.81466e-35	69.528	non
GCHFR	0.261341	5.91046	13.1724	9.18621e-36	4.22779e-35	69.4139	non
MCCC1	-0.199118	5.72418	-13.1733	9.10013e-36	4.19167e-35	69.4114	non
SLAMF8	-0.22259	4.1537	-13.1559	1.09586e-35	5.03512e-35	69.3572	non
RASSF1	-0.200567	6.5031	-13.1589	1.06156e-35	4.88157e-35	69.3561	non
WBSCR22	-0.244792	6.81818	-13.1539	1.12028e-35	5.14308e-35	69.3512	non
TM9SF4	-0.275416	6.43514	-13.1417	1.2764e-35	5.85491e-35	69.1645	non
IFIT5	0.199767	5.86118	13.1298	1.44989e-35	6.64524e-35	68.955	non
RPS29	0.496217	11.8198	13.0584	3.11273e-35	1.41609e-34	68.8498	non
CNN2	-0.292721	7.88036	-13.0886	2.2548e-35	1.03002e-34	68.8083	non
TBC1D13	-0.167822	5.13166	-13.1103	1.78786e-35	8.18745e-35	68.7338	non
CSNK1E	-0.147196	5.03774	-13.1023	1.94668e-35	8.90738e-35	68.6573	non
RPS28	-0.388358	11.1561	-13.0398	3.79744e-35	1.72192e-34	68.6104	non
CDC23	-0.183444	5.9402	-13.0892	2.24167e-35	1.02487e-34	68.5356	non
PMF1	0.162306	5.88049	13.0862	2.31326e-35	1.05586e-34	68.4923	non
SRGN	0.499597	11.0308	13.0205	4.66569e-35	2.11216e-34	68.386	non
HK2	0.189882	6.83585	13.0625	2.98028e-35	1.35695e-34	68.3708	non
IMPDH2	-0.312182	7.24358	-13.0536	3.27765e-35	1.48989e-34	68.3492	non
ZFYVE21	-0.152154	5.93161	-13.0694	2.76819e-35	1.26246e-34	68.324	non
IGF2BP2	0.322745	5.89622	13.0629	2.96859e-35	1.35274e-34	68.2448	non
C7orf26	-0.203836	6.65891	-13.0432	3.66405e-35	1.6628e-34	68.1467	non
AXIN1	-0.209136	5.85815	-13.0513	3.36073e-35	1.5264e-34	68.1242	non
KLHDC4	-0.196758	6.08799	-13.0289	4.26772e-35	1.93358e-34	67.9132	non
USP3	0.301104	8.33042	12.9901	6.45445e-35	2.91478e-34	67.8075	non
CASP2	-0.153749	7.08183	-12.9984	5.90774e-35	2.67225e-34	67.7351	non
RPL27	0.43415	11.276	12.9472	1.01848e-34	4.56212e-34	67.6303	non
IL10RA	-0.217481	8.68217	-12.9684	8.12458e-35	3.66003e-34	67.6271	non
MXD1	0.406965	8.23473	12.9715	7.86699e-35	3.54688e-34	67.5975	non
NUDT18	0.222422	5.69911	12.997	5.99439e-35	2.70923e-34	67.5289	non
GORASP2	-0.168804	6.95615	-12.9787	7.28217e-35	3.28589e-34	67.5079	non
SLC20A1	-0.329644	7.5075	-12.9598	8.90457e-35	4.00163e-34	67.3928	non
TP53BP1	-0.178423	4.63749	-12.9648	8.44778e-35	3.80253e-34	67.2499	non
CBY1	-0.178075	4.7636	-12.9629	8.61381e-35	3.87411e-34	67.2116	non
ACAT1	0.189146	6.4409	12.9508	9.80267e-35	4.39808e-34	67.1268	non
XAB2	-0.276391	6.18849	-12.9531	9.56697e-35	4.29582e-34	67.1251	non
TSPAN5	0.327453	6.2052	12.9499	9.89272e-35	4.43489e-34	67.0831	non
COX6C	0.288142	9.45058	12.9104	1.50565e-34	6.72258e-34	67.0825	non
POLR1C	-0.200352	5.69408	-12.946	1.03106e-34	4.61473e-34	66.9931	non
ZNF668	-0.239794	4.53687	-12.9315	1.20312e-34	5.3805e-34	66.9125	non
RPS18	0.320447	10.9491	12.8794	2.09118e-34	9.29189e-34	66.8898	non
FAM127B	-0.190518	4.59845	-12.9218	1.33355e-34	5.95897e-34	66.8014	non
ACTL6A	-0.243744	6.24207	-12.9078	1.54774e-34	6.90493e-34	66.6529	non
MCM5	-0.163336	6.37219	-12.8996	1.68827e-34	7.52579e-34	66.583	non
IKZF1	-0.183125	8.52965	-12.8681	2.35548e-34	1.04411e-33	66.551	non
FBXL12	-0.155148	6.09662	-12.896	1.7535e-34	7.80401e-34	66.5072	non
SAP30BP	0.143879	6.17996	12.8946	1.77958e-34	7.91369e-34	66.4978	non
RNF122	0.262202	5.42365	12.8976	1.72409e-34	7.67926e-34	66.4696	non
GATA2	-0.193334	5.87195	-12.8779	2.12491e-34	9.4342e-34	66.2902	non
ACOX1	0.19289	5.64697	12.8739	2.21614e-34	9.83134e-34	66.2245	non
AMOT	-0.29347	3.61461	-12.8409	3.14315e-34	1.38881e-33	66.104	non
POLA2	-0.147126	5.07827	-12.8616	2.52344e-34	1.11767e-33	66.1038	non
WWC3	0.254085	6.18339	12.8537	2.74261e-34	1.2128e-33	66.0664	non
DIDO1	-0.159557	5.56312	-12.854	2.73626e-34	1.21096e-33	66.0129	non
ACYP1	-0.177833	5.46894	-12.8267	3.65163e-34	1.61219e-33	65.723	non
NAPG	0.16067	5.8246	12.8247	3.72734e-34	1.64431e-33	65.7207	non
BCL11B	-0.212261	8.1431	-12.7776	6.13013e-34	2.6957e-33	65.5543	non
PSME4	0.326098	7.09571	12.7912	5.31157e-34	2.33946e-33	65.5424	non
MAPRE1	-0.208451	8.30482	-12.7635	7.11288e-34	3.11794e-33	65.4259	non
KCNN4	-0.218975	5.42826	-12.7939	5.16074e-34	2.27484e-33	65.3787	non
CLEC10A	-0.203218	5.24605	-12.7868	5.56351e-34	2.44847e-33	65.3064	non
MRPS33	0.142087	6.25247	12.7713	6.54646e-34	2.87421e-33	65.2115	non
DEXI	-0.26706	5.64523	-12.776	6.23555e-34	2.73988e-33	65.2005	non
DCK	-0.195387	7.01661	-12.7527	7.96957e-34	3.49071e-33	65.1373	non
CSTF3	-0.123972	5.95288	-12.7642	7.05461e-34	3.09486e-33	65.1037	non
RFXANK	0.179064	6.05825	12.7449	8.64986e-34	3.78568e-33	64.9086	non
KBTBD11	0.257184	6.06341	12.7445	8.68273e-34	3.79706e-33	64.9046	non
PSTPIP1	0.340854	6.84696	12.7197	1.12679e-33	4.91979e-33	64.7557	non
ACTR5	-0.182564	5.49225	-12.7335	9.75322e-34	4.26183e-33	64.746	non
PRDM8	-0.23855	4.19412	-12.7176	1.15194e-33	5.02168e-33	64.7187	non
TRIM26	-0.23289	6.45594	-12.7168	1.16151e-33	5.05942e-33	64.6781	non
STIM1	0.230375	6.02149	12.7181	1.14677e-33	5.00311e-33	64.6231	non
GEMIN6	0.202942	5.21243	12.7077	1.27812e-33	5.563e-33	64.4831	non
IFNAR2	0.203451	6.9397	12.6771	1.76232e-33	7.65841e-33	64.3274	non
RENBP	0.287504	6.2089	12.6856	1.61168e-33	7.00929e-33	64.3074	non
GP9	0.339963	7.06	12.6596	2.11757e-33	9.18056e-33	64.161	non
PA2G4	0.18703	6.81788	12.6603	2.10214e-33	9.1208e-33	64.1336	non
MRPL23	0.332094	7.19231	12.6456	2.45153e-33	1.06118e-32	64.0357	non
CAMSAP1	-0.143228	5.13991	-12.6645	2.01083e-33	8.73149e-33	64.0337	non
LRRC42	-0.163618	4.80935	-12.6498	2.34596e-33	1.01628e-32	63.9174	non
NUDT3	0.220577	5.88928	12.6427	2.5277e-33	1.09329e-32	63.8222	non
SLA	0.430585	8.14671	12.6091	3.59042e-33	1.55174e-32	63.7862	non
BCL6	0.392478	8.27746	12.6035	3.80965e-33	1.6452e-32	63.7439	non
RPL11	0.404088	11.459	12.5586	6.08773e-33	2.6208e-32	63.5799	non
DUSP3	0.348593	7.05161	12.6007	3.92056e-33	1.69177e-32	63.5469	non
FOXC2	-0.24858	3.81328	-12.5666	5.6e-33	2.41459e-32	63.207	non
IL1RN	0.287455	6.46616	12.5648	5.70623e-33	2.45848e-32	63.0857	non
LYL1	-0.32001	7.65039	-12.54	7.38856e-33	3.17341e-32	63.0172	non
BAZ1A	0.214766	7.00885	12.5425	7.19846e-33	3.09657e-32	62.9382	non
NDUFA6	0.204469	7.32824	12.5368	7.63533e-33	3.27685e-32	62.9289	non
SEPHS2	0.106513	6.88265	12.5406	7.34242e-33	3.15604e-32	62.901	non
RAB32	0.295531	7.07546	12.5334	7.91449e-33	3.39403e-32	62.8529	non
LRFN3	-0.196918	4.4025	-12.532	8.03028e-33	3.44102e-32	62.755	non
SLC35F2	-0.160795	4.70308	-12.505	1.06321e-32	4.55238e-32	62.4297	non
ST6GALNAC4	0.303382	6.10374	12.4966	1.16025e-32	4.96021e-32	62.3301	non
ABL1	-0.121922	5.65831	-12.4993	1.1285e-32	4.82818e-32	62.3172	non
ERCC3	-0.166416	5.89002	-12.4879	1.27036e-32	5.42673e-32	62.2217	non
BCKDHA	-0.201571	6.12775	-12.4684	1.55464e-32	6.63599e-32	62.0506	non
RPAIN	0.190959	6.61049	12.4611	1.67721e-32	7.15368e-32	62.0364	non
RPS19	-0.298579	11.7436	-12.3997	3.16786e-32	1.34185e-31	61.9707	non
PHACTR1	0.23998	4.42821	12.4462	1.95656e-32	8.33231e-32	61.8745	non
FES	0.412184	7.18746	12.4357	2.18208e-32	9.27846e-32	61.8593	non
LMAN2	0.176305	6.04012	12.4514	1.8553e-32	7.90717e-32	61.8568	non
CSNK2A2	-0.167765	6.41566	-12.4435	2.0123e-32	8.56311e-32	61.8335	non
C5orf30	0.173523	4.76982	12.4234	2.47806e-32	1.05289e-31	61.5846	non
NPC2	-0.434882	9.71027	-12.3655	4.50909e-32	1.90414e-31	61.4481	non
RNF126	-0.196252	6.40165	-12.406	2.96749e-32	1.25891e-31	61.4458	non
PUS3	0.138978	5.70792	12.4107	2.82799e-32	1.20065e-31	61.4043	non
FEZ1	-0.210438	4.78118	-12.4019	3.09588e-32	1.31237e-31	61.3546	non
PJA2	0.264075	8.07205	12.3706	4.27889e-32	1.80831e-31	61.3154	non
THBD	0.227415	4.79398	12.3966	3.27245e-32	1.3851e-31	61.3058	non
MCPH1	-0.193022	4.28765	-12.3809	3.84827e-32	1.62757e-31	61.2147	non
CD74	-0.284211	10.5328	-12.3101	7.98415e-32	3.35371e-31	60.9533	non
PRKAG2	-0.111697	5.52957	-12.3623	4.66274e-32	1.96752e-31	60.8992	non
TWF2	-0.27085	7.12243	-12.3245	6.88235e-32	2.8953e-31	60.7212	non
TEX10	-0.158533	5.6222	-12.3434	5.66617e-32	2.38912e-31	60.7107	non
TXN2	0.145824	6.24961	12.3349	6.18415e-32	2.60554e-31	60.6868	non
ATF6	0.203689	7.13705	12.3174	7.40284e-32	3.11189e-31	60.6407	non
DBP	-0.1637	5.27855	-12.3251	6.84261e-32	2.88077e-31	60.518	non
DDX10	-0.14328	5.47414	-12.3021	8.66418e-32	3.63659e-31	60.2819	non
IL5RA	-0.230354	4.0822	-12.2729	1.17033e-31	4.90474e-31	60.1408	non
NIN	0.137773	7.54563	12.2569	1.37962e-31	5.7731e-31	60.0833	non
IFI44L	0.452052	6.42115	12.2737	1.16029e-31	4.86637e-31	60.0814	non
PHGDH	-0.22186	4.70286	-12.272	1.18159e-31	4.94817e-31	60.0339	non
EIF4EBP2	0.284556	7.46754	12.219	2.03341e-31	8.5025e-31	59.6839	non
CD93	0.245173	8.52978	12.1815	2.98588e-31	1.23915e-30	59.4402	non
CD37	-0.353844	9.28957	-12.172	3.28905e-31	1.35987e-30	59.4319	non
OSBP	-0.24036	6.23369	-12.2108	2.2114e-31	9.23976e-31	59.4254	non
NKTR	-0.297867	8.06484	-12.1823	2.96178e-31	1.231e-30	59.401	non
MARCKSL1	-0.231253	7.12869	-12.1935	2.6413e-31	1.09945e-30	59.3841	non
ARMC7	0.199691	5.3813	12.2085	2.26463e-31	9.45505e-31	59.3263	non
GNAI2	-0.272562	8.80973	-12.1629	3.60985e-31	1.49139e-30	59.2905	non
EPB41L3	-0.23333	6.10861	-12.1971	2.54556e-31	1.06119e-30	59.2685	non
GTPBP3	-0.129544	5.82591	-12.1985	2.5086e-31	1.04657e-30	59.2474	non
SBNO2	0.265625	5.93324	12.1954	2.59085e-31	1.07926e-30	59.2216	non
LY9	-0.20433	6.63416	-12.182	2.97075e-31	1.2338e-30	59.1901	non
HERC2	-0.152146	5.32324	-12.1932	2.64879e-31	1.10174e-30	59.1705	non
CEP350	0.109867	7.50223	12.1597	3.72945e-31	1.53965e-30	59.0891	non
SSRP1	-0.190429	6.18656	-12.1749	3.19401e-31	1.32354e-30	59.0522	non
TLR6	0.248706	5.90451	12.1775	3.11025e-31	1.2898e-30	59.037	non
INPP5B	-0.175864	4.80626	-12.1747	3.20098e-31	1.32543e-30	59.0283	non
SNX13	0.115048	5.50232	12.1741	3.21967e-31	1.33218e-30	58.9758	non
LPXN	-0.260415	8.39584	-12.1311	4.9943e-31	2.05569e-30	58.9213	non
GCA	0.368934	8.91954	12.1248	5.32657e-31	2.19082e-30	58.9062	non
RABAC1	0.275844	8.19165	12.1199	5.59618e-31	2.30001e-30	58.7745	non
PELP1	-0.220351	5.1735	-12.1509	4.08004e-31	1.68313e-30	58.7478	non
TTC27	-0.158421	5.49691	-12.1462	4.28129e-31	1.76484e-30	58.6938	non
WIPI1	0.242952	5.64855	12.1321	4.941e-31	2.03526e-30	58.556	non
MAN2A2	0.182736	6.89345	12.1144	5.91909e-31	2.42911e-30	58.5361	non
OAZ1	-0.188022	11.8986	-12.0602	1.02728e-30	4.19092e-30	58.526	non
HDAC3	-0.166608	6.50686	-12.1173	5.74716e-31	2.3603e-30	58.5138	non
RGS12	-0.224885	4.02842	-12.1105	6.15831e-31	2.52541e-30	58.4985	non
PIAS1	0.209363	7.82116	12.0823	8.20933e-31	3.35654e-30	58.347	non
KCNJ10	-0.349424	6.01104	-12.1028	6.65881e-31	2.72863e-30	58.3029	non
MFGE8	-0.324111	5.66618	-12.1012	6.76895e-31	2.77171e-30	58.251	non
CSNK2B	-0.254309	8.19444	-12.0655	9.73717e-31	3.97535e-30	58.2333	non
MAPKAPK2	0.157871	6.77372	12.0781	8.5614e-31	3.49791e-30	58.1512	non
VAMP8	0.372345	9.19659	12.0465	1.18097e-30	4.80731e-30	58.1427	non
FLAD1	-0.176421	5.67169	-12.0885	7.70215e-31	3.1515e-30	58.1192	non
PIM1	-0.338735	8.76109	-12.0412	1.24521e-30	5.06136e-30	58.0557	non
STK39	-0.21764	6.24485	-12.0584	1.04569e-30	4.26288e-30	57.8817	non
LST1	0.253037	8.91191	12.0231	1.49694e-30	6.06671e-30	57.8802	non
SYF2	0.263231	7.60561	12.0364	1.3079e-30	5.31227e-30	57.8536	non
ASH2L	-0.187378	6.84546	-12.0457	1.19021e-30	4.84137e-30	57.8422	non
MYO1F	0.233234	8.96796	12.0145	1.63303e-30	6.5989e-30	57.7997	non
LRIG1	-0.189194	6.06163	-12.05	1.13951e-30	4.64195e-30	57.7712	non
EPB41L5	-0.166251	4.32954	-12.0335	1.34671e-30	5.46586e-30	57.6735	non
P2RX1	0.285268	6.42394	12.0325	1.36073e-30	5.51875e-30	57.6358	non
KIAA0513	0.27378	6.97766	12.0218	1.51685e-30	6.14293e-30	57.6121	non
OBFC1	0.197738	6.32662	12.0199	1.54554e-30	6.24994e-30	57.4965	non
SNTB1	-0.142981	5.95756	-12.0209	1.53023e-30	6.19258e-30	57.4643	non
NUAK1	-0.220048	4.09489	-12.008	1.74428e-30	7.04332e-30	57.4529	non
LSM14A	0.216764	7.98387	11.9734	2.47427e-30	9.97643e-30	57.2718	non
TRIP12	0.146598	6.68055	11.9861	2.17683e-30	8.78355e-30	57.2095	non
GPI	-0.296828	7.59405	-11.9703	2.55269e-30	1.02777e-29	57.1983	non
IFI6	0.385092	8.20771	11.9559	2.95437e-30	1.1869e-29	57.1212	non
UBE2L6	-0.303455	8.04787	-11.9458	3.27174e-30	1.31249e-29	57.0115	non
PHYH	-0.147113	5.18875	-11.9711	2.53324e-30	1.02068e-29	56.9309	non
POLR2C	0.145631	6.7028	11.9546	2.99193e-30	1.20111e-29	56.8967	non
RPS6KB2	0.204212	6.09776	11.9585	2.87764e-30	1.15691e-29	56.8478	non
TXNL4B	0.112495	5.51099	11.9615	2.79032e-30	1.12262e-29	56.8289	non
NEFH	-0.198635	4.11628	-11.9274	3.9383e-30	1.57532e-29	56.6403	non
TPM2	-0.246714	5.09256	-11.9392	3.49535e-30	1.40118e-29	56.6181	non
PRKCQ	-0.282452	7.03635	-11.9165	4.39405e-30	1.75508e-29	56.576	non
MANSC1	0.264207	5.25213	11.9347	3.65769e-30	1.4652e-29	56.5664	non
DCTN6	0.18665	6.09837	11.9286	3.88807e-30	1.55635e-29	56.549	non
CORO1C	0.197909	7.2615	11.9098	4.70043e-30	1.87475e-29	56.5335	non
CAPN1	-0.297413	6.9746	-11.911	4.6435e-30	1.85338e-29	56.512	non
COPS3	0.220715	7.31502	11.9009	5.14099e-30	2.04899e-29	56.452	non
SIAH1	-0.16034	5.97307	-11.9193	4.27354e-30	1.70818e-29	56.4454	non
B4GALT5	0.391615	6.98966	11.8922	5.61011e-30	2.23435e-29	56.312	non
TBC1D15	0.186056	6.6683	11.8919	5.63136e-30	2.2412e-29	56.2621	non
CRIP1	-0.353107	8.84928	-11.857	7.99482e-30	3.17269e-29	56.2176	non
OS9	0.187426	7.66344	11.8676	7.183e-30	2.85462e-29	56.17	non
DBN1	0.17735	4.83826	11.8719	6.88296e-30	2.73735e-29	55.9798	non
ALG13	0.149596	6.71109	11.8623	7.57556e-30	3.00847e-29	55.9745	non
SERPINE2	-0.200378	5.09384	-11.855	8.15663e-30	3.23459e-29	55.7755	non
FRAT2	0.335953	8.68833	11.8131	1.24203e-29	4.9043e-29	55.7523	non
RAPGEF1	-0.215594	7.0208	-11.8315	1.03263e-29	4.08913e-29	55.7227	non
SCRN1	-0.169905	6.1522	-11.8409	9.39722e-30	3.72388e-29	55.6852	non
H2AFY2	-0.205479	4.82797	-11.8263	1.08742e-29	4.29992e-29	55.52	non
TMEM106C	0.182455	5.35415	11.8281	1.06775e-29	4.22516e-29	55.4954	non
LRRN3	-0.368891	6.07792	-11.8219	1.13718e-29	4.49347e-29	55.491	non
MR1	0.161922	6.12249	11.7952	1.48537e-29	5.86095e-29	55.22	non
GRK6	0.160912	6.98355	11.7819	1.69626e-29	6.68832e-29	55.2153	non
CCR7	-0.377035	8.80878	-11.7434	2.49084e-29	9.77256e-29	55.0847	non
CXorf57	-0.201019	4.53933	-11.7756	1.80606e-29	7.11113e-29	55.0592	non
ACSL4	0.163438	6.12668	11.7776	1.7701e-29	6.97449e-29	55.0463	non
GAL3ST4	-0.177151	4.98394	-11.7753	1.81252e-29	7.13147e-29	54.9927	non
PRPF4	-0.120173	6.25786	-11.7626	2.05625e-29	8.0847e-29	54.9201	non
EXOC2	-0.108849	5.42844	-11.757	2.17588e-29	8.54897e-29	54.7867	non
MLF2	0.262221	7.13433	11.7364	2.67219e-29	1.04766e-28	54.7854	non
BCKDHB	-0.170858	4.60803	-11.7468	2.4093e-29	9.45939e-29	54.7625	non
NUDT1	0.207648	6.37735	11.7358	2.68729e-29	1.05284e-28	54.665	non
MBTPS1	-0.194139	6.62018	-11.727	2.93337e-29	1.14763e-28	54.6225	non
SAT1	0.341341	10.3238	11.6814	4.61913e-29	1.80332e-28	54.6088	non
MS4A3	0.191602	5.7416	11.731	2.82039e-29	1.10421e-28	54.5413	non
NEDD8	0.196679	8.24835	11.6782	4.76831e-29	1.85893e-28	54.3657	non
DOLPP1	-0.162592	5.42365	-11.7126	3.38725e-29	1.32426e-28	54.3473	non
ENO2	0.251313	5.76553	11.7031	3.72251e-29	1.4543e-28	54.2673	non
SP1	0.187195	7.70788	11.6662	5.37233e-29	2.09294e-28	54.1768	non
OCRL	-0.147623	4.69056	-11.6804	4.66612e-29	1.82038e-28	54.0932	non
RPS6KA1	0.263301	7.48595	11.656	5.94689e-29	2.31514e-28	54.0433	non
PLEK	-0.345777	8.72713	-11.6341	7.38889e-29	2.86845e-28	53.9955	non
SEC14L1	-0.292077	7.08044	-11.6437	6.71453e-29	2.61032e-28	53.8735	non
UCP3	-0.184268	4.2264	-11.646	6.56664e-29	2.55462e-28	53.8264	non
UGCG	0.164473	7.01668	11.6362	7.23581e-29	2.81099e-28	53.7789	non
C12orf10	-0.265474	7.07311	-11.6281	7.83805e-29	3.04068e-28	53.7181	non
ATG3	0.2629	8.47769	11.6	1.03557e-28	4.00893e-28	53.6222	non
LHPP	-0.256531	5.97982	-11.6234	8.21268e-29	3.18378e-28	53.5106	non
RALB	0.364033	8.32489	11.5901	1.14207e-28	4.41812e-28	53.5049	non
NCLN	0.228483	6.53799	11.6142	8.99469e-29	3.4845e-28	53.4878	non
LBR	0.210158	8.61752	11.5808	1.25152e-28	4.82805e-28	53.4514	non
CFP	0.210812	7.59501	11.589	1.15423e-28	4.46204e-28	53.401	non
CANT1	0.270751	6.40403	11.5865	1.18328e-28	4.57114e-28	53.1949	non
RPL9	0.387089	11.0295	11.5297	2.07387e-28	7.95056e-28	53.1802	non
CASP3	0.22842	6.29814	11.585	1.20061e-28	4.63488e-28	53.1659	non
TRIM27	0.116887	6.37808	11.574	1.33921e-28	5.15915e-28	53.0705	non
FAM50B	-0.130342	5.09584	-11.5773	1.29567e-28	4.99489e-28	53.0268	non
SNX11	0.210465	6.61563	11.5591	1.55084e-28	5.96608e-28	52.9587	non
PEMT	-0.134735	4.97472	-11.5654	1.45817e-28	5.6135e-28	52.9217	non
PSMD7	-0.194263	7.09905	-11.5441	1.7987e-28	6.91002e-28	52.8951	non
DRG2	-0.15198	5.74608	-11.5583	1.56335e-28	6.01006e-28	52.8436	non
ETV6	0.255363	6.17692	11.5359	1.95019e-28	7.48157e-28	52.6671	non
BLMH	-0.157564	5.7756	-11.537	1.93007e-28	7.40955e-28	52.637	non
SIL1	-0.207102	5.34258	-11.5227	2.22137e-28	8.51011e-28	52.4792	non
STT3A	-0.161033	5.84774	-11.5084	2.55737e-28	9.79056e-28	52.3647	non
IMP4	-0.198781	6.72323	-11.4794	3.39998e-28	1.29984e-27	52.2039	non
NIP7	-0.180865	6.1974	-11.4832	3.27455e-28	1.25275e-27	52.1627	non
VPS37B	0.273682	6.86281	11.4738	3.59379e-28	1.37299e-27	52.1605	non
CHD8	0.303363	7.26239	11.4495	4.56127e-28	1.7378e-27	51.9855	non
NCOA6	-0.17094	6.61959	-11.4571	4.23141e-28	1.61436e-27	51.9701	non
BAD	0.148009	4.87266	11.4631	3.98908e-28	1.52295e-27	51.9397	non
FAM46C	0.414582	8.18016	11.4312	5.45449e-28	2.07526e-27	51.933	non
LSM4	-0.234585	6.85374	-11.4355	5.23044e-28	1.99138e-27	51.7972	non
BCL2L2	-0.145496	5.16768	-11.4496	4.55695e-28	1.73736e-27	51.7717	non
DNAJB6	0.246341	6.63771	11.4292	5.56543e-28	2.11601e-27	51.6919	non
SEMA4A	0.348219	7.2763	11.4157	6.35226e-28	2.41185e-27	51.6577	non
NFIL3	0.325927	6.59278	11.4247	5.81649e-28	2.20995e-27	51.64	non
FAM129A	0.358515	8.56307	11.3735	9.59191e-28	3.62944e-27	51.4201	non
MYB	0.168899	5.24682	11.4032	7.17762e-28	2.72336e-27	51.3177	non
MLH1	-0.138129	6.6716	-11.3811	8.90532e-28	3.37195e-27	51.2379	non
HS1BP3	0.151485	6.19881	11.386	8.49297e-28	3.22023e-27	51.2096	non
FKBP8	0.24414	6.27198	11.3826	8.7797e-28	3.32667e-27	51.1853	non
SNRPD2	0.218024	8.86348	11.3341	1.40845e-27	5.30399e-27	51.0746	non
SCD	-0.187046	4.37961	-11.3549	1.14992e-27	4.34816e-27	50.9576	non
TTLL12	0.153688	6.24273	11.3492	1.2152e-27	4.58871e-27	50.8596	non
LZTR1	-0.243143	6.59655	-11.3407	1.32106e-27	4.98165e-27	50.8373	non
EPHA4	-0.179372	5.12302	-11.352	1.18281e-27	4.46947e-27	50.8274	non
PLEKHM2	-0.195418	6.89643	-11.3344	1.40423e-27	5.29167e-27	50.8219	non
PAK4	-0.131653	4.78355	-11.3436	1.28357e-27	4.84361e-27	50.7863	non
TSPO	0.41372	9.76617	11.2925	2.11054e-27	7.91561e-27	50.7605	non
RPL35A	0.386999	10.9919	11.2774	2.4434e-27	9.13302e-27	50.7289	non
RAB31	0.315446	8.7424	11.2928	2.1052e-27	7.90094e-27	50.6608	non
VCAN	0.275233	10.1145	11.2784	2.41986e-27	9.05116e-27	50.66	non
IKBKB	-0.130776	7.28662	-11.3015	1.93397e-27	7.26817e-27	50.5633	non
RNASEL	0.227458	6.34169	11.3055	1.86092e-27	7.00314e-27	50.4491	non
ALDH3A2	-0.137212	5.91448	-11.3025	1.91591e-27	7.20517e-27	50.3709	non
SLC10A3	-0.161004	5.97789	-11.3007	1.94824e-27	7.31682e-27	50.3624	non
NFYC	0.186717	6.95483	11.2848	2.27478e-27	8.52002e-27	50.3435	non
ATP6V1G1	0.182338	9.00005	11.2481	3.24756e-27	1.21061e-26	50.2599	non
SURF1	0.235607	7.08257	11.2717	2.58388e-27	9.6516e-27	50.2362	non
C2orf42	-0.194464	5.64555	-11.2909	2.14434e-27	8.03692e-27	50.2351	non
NIT2	0.161387	5.94432	11.2808	2.36364e-27	8.84687e-27	50.161	non
UBE2J1	0.218681	7.14091	11.2458	3.31921e-27	1.23566e-26	49.9971	non
CLCF1	-0.185575	4.96305	-11.258	2.9485e-27	1.10062e-26	49.9357	non
ACTR6	0.13056	6.29026	11.2517	3.13415e-27	1.16912e-26	49.9254	non
DDX31	-0.206036	4.14676	-11.2398	3.51919e-27	1.30922e-26	49.8836	non
RBM15B	-0.110381	5.83715	-11.2461	3.31116e-27	1.23349e-26	49.8185	non
CDC42EP4	0.252634	5.84116	11.2315	3.81113e-27	1.41688e-26	49.675	non
CKS2	0.163274	5.14706	11.2265	4.00034e-27	1.48623e-26	49.6181	non
DNAL4	-0.191599	5.22587	-11.2245	4.0805e-27	1.51499e-26	49.5909	non
AKR1C4	-0.272677	3.53111	-11.194	5.47608e-27	2.03041e-26	49.5458	non
LAMP1	-0.262565	9.76912	-11.1494	8.42276e-27	3.11254e-26	49.396	non
WDR37	-0.137654	6.63806	-11.1832	6.07752e-27	2.2519e-26	49.3253	non
SLC25A23	-0.230132	5.45406	-11.1957	5.38855e-27	1.99929e-26	49.3121	non
DHRS7	0.252034	8.65303	11.1438	8.88295e-27	3.27822e-26	49.2224	non
CLINT1	-0.175821	7.35306	-11.155	7.97766e-27	2.95398e-26	49.1669	non
SETD2	-0.127376	7.38784	-11.1401	9.20546e-27	3.39497e-26	49.0289	non
SSH1	0.136648	6.0267	11.1532	8.11691e-27	3.00353e-26	48.9456	non
PFN1	-0.231956	10.5246	-11.0925	1.45448e-26	5.33212e-26	48.9248	non
SUV39H1	-0.131107	5.25357	-11.1519	8.21754e-27	3.03873e-26	48.8939	non
NUBP1	-0.150842	5.92329	-11.1459	8.71025e-27	3.21663e-26	48.8682	non
NT5C	-0.234171	6.5549	-11.1336	9.80716e-27	3.61447e-26	48.8397	non
LYRM4	-0.119549	5.76239	-11.1301	1.01393e-26	3.73439e-26	48.6998	non
PBX3	-0.153025	6.2297	-11.1223	1.09237e-26	4.02064e-26	48.6826	non
RBM15	0.198997	6.52047	11.103	1.31517e-26	4.83103e-26	48.5338	non
PPM1H	-0.192626	4.08752	-11.0967	1.39766e-26	5.12723e-26	48.5238	non
TNFRSF21	-0.228614	4.90909	-11.1093	1.23878e-26	4.55645e-26	48.5165	non
MCM4	-0.1181	5.11973	-11.1066	1.27119e-26	4.67259e-26	48.4689	non
C1orf35	-0.172343	5.21026	-11.102	1.32833e-26	4.87611e-26	48.4194	non
CDKN2AIP	-0.09821	5.98052	-11.0872	1.53095e-26	5.60876e-26	48.3138	non
ZNF235	-0.203037	4.16172	-11.0652	1.89082e-26	6.92256e-26	48.2115	non
FAM32A	0.226698	7.67369	11.047	2.25027e-26	8.21685e-26	48.1752	non
CLC	0.358963	8.58575	11.0342	2.54217e-26	9.25826e-26	48.1692	non
LY6E	-0.377101	7.77119	-11.0416	2.36841e-26	8.64252e-26	48.1495	non
RPL22	0.194491	10.5644	11.0092	3.22925e-26	1.16989e-25	48.1316	non
ERLIN1	0.131312	6.33413	11.0621	1.94775e-26	7.12628e-26	48.1174	non
TNFAIP2	-0.280025	7.87126	-11.037	2.47533e-26	9.0267e-26	48.1172	non
NECAP2	-0.277894	7.69424	-11.0364	2.48986e-26	9.07373e-26	48.0874	non
MRPL40	0.111464	5.94405	11.0584	2.01743e-26	7.37636e-26	48.032	non
ARPC2	0.229263	10.2897	10.9987	3.56852e-26	1.29026e-25	48.0066	non
PPP1R16B	-0.307622	6.37918	-11.0472	2.24502e-26	8.20308e-26	47.9929	non
RBM5	-0.237842	8.22708	-11.017	2.99776e-26	1.08888e-25	47.9717	non
CDC40	0.140491	7.16	11.0311	2.61974e-26	9.53449e-26	47.9502	non
CERK	-0.181286	7.12713	-11.0276	2.70722e-26	9.8399e-26	47.9195	non
SLC31A2	0.311227	7.64961	11.0137	3.09233e-26	1.12176e-25	47.8549	non
ATP6V0B	0.321787	9.23266	10.9913	3.82728e-26	1.38112e-25	47.833	non
TRIAP1	0.142921	6.30196	11.028	2.69881e-26	9.81578e-26	47.7888	non
DOCK10	-0.253892	7.60428	-11.0002	3.51767e-26	1.27271e-25	47.7314	non
GALK2	-0.138333	4.82791	-11.0168	3.00189e-26	1.08966e-25	47.6492	non
IL10RB	0.234907	7.47284	10.9922	3.79535e-26	1.37138e-25	47.6276	non
EDEM2	0.160427	6.4388	11.0083	3.25525e-26	1.17854e-25	47.6223	non
VAT1	0.169654	5.8506	11.0127	3.12109e-26	1.13145e-25	47.5881	non
PSMB2	-0.211993	7.44827	-10.9777	4.36018e-26	1.57137e-25	47.4953	non
PCDHGB6	0.215667	4.15742	10.9827	4.15703e-26	1.49913e-25	47.4392	non
POLR3C	-0.15748	6.16914	-10.9919	3.80598e-26	1.37433e-25	47.435	non
SSR2	0.150363	8.58936	10.934	6.60668e-26	2.37326e-25	47.2251	non
TARBP2	-0.136667	5.25165	-10.9708	4.65374e-26	1.67607e-25	47.1721	non
ACTR1A	-0.232336	6.70548	-10.9498	5.68279e-26	2.04403e-25	47.1184	non
BRD3	0.217118	7.17648	10.9328	6.67953e-26	2.39631e-25	47.0221	non
ABHD14A	-0.197123	5.79401	-10.9522	5.5541e-26	1.99904e-25	47.0157	non
GIPC1	-0.146663	5.04867	-10.9495	5.69869e-26	2.04842e-25	46.9855	non
PHF20	0.141854	7.00907	10.9278	7.00169e-26	2.51026e-25	46.9502	non
VPS28	0.253939	8.1959	10.9093	8.35036e-26	2.98798e-25	46.9426	non
TRPV2	-0.189545	6.60853	-10.9228	7.34392e-26	2.62955e-25	46.8479	non
MAN1B1	-0.171581	6.49558	-10.9228	7.34363e-26	2.62955e-25	46.8302	non
RSAD2	0.242399	5.54179	10.9334	6.63873e-26	2.38322e-25	46.8185	non
DGCR2	0.163907	6.79469	10.903	8.85989e-26	3.16826e-25	46.6825	non
MYOM2	-0.338026	5.99672	-10.8885	1.01679e-25	3.63364e-25	46.4416	non
WBP2	-0.341437	9.15177	-10.8394	1.61656e-25	5.75472e-25	46.4045	non
TRAF3IP2	-0.134385	5.30051	-10.88	1.10166e-25	3.93442e-25	46.3149	non
RGS19	0.173496	8.28161	10.8398	1.61036e-25	5.73634e-25	46.303	non
CPOX	-0.200694	6.03957	-10.8678	1.23618e-25	4.41196e-25	46.2494	non
BRF2	-0.108067	5.48177	-10.8635	1.28776e-25	4.59308e-25	46.1593	non
FCGR3B	-0.370329	9.3287	-10.8108	2.11737e-25	7.50853e-25	46.1548	non
SLC35C1	-0.149961	5.33783	-10.8503	1.45865e-25	5.19927e-25	46.0355	non
DPH5	0.164488	6.64436	10.8347	1.69115e-25	6.01638e-25	46.0177	non
SUMO3	-0.206644	8.12935	-10.8035	2.26812e-25	8.03279e-25	45.9507	non
BBS9	-0.170157	4.51539	-10.8315	1.74251e-25	6.19509e-25	45.9506	non
TRIM25	0.154502	6.90301	10.8222	1.90246e-25	6.75942e-25	45.9411	non
BSDC1	-0.181724	7.03539	-10.8111	2.11142e-25	7.49221e-25	45.866	non
FCER1G	0.310697	9.95091	10.764	3.28908e-25	1.15893e-24	45.77	non
MID1IP1	-0.222738	6.63834	-10.8038	2.26233e-25	8.01744e-25	45.7364	non
CHI3L2	-0.174989	4.79883	-10.8123	2.08765e-25	7.41263e-25	45.7275	non
HSPA9	-0.257845	7.5746	-10.7793	2.84704e-25	1.00509e-24	45.6519	non
KIAA0196	-0.188096	6.57367	-10.7903	2.56763e-25	9.07611e-25	45.5999	non
HPSE	0.17948	5.75049	10.7961	2.43222e-25	8.60847e-25	45.5405	non
SNX27	-0.223453	7.40396	-10.7683	3.15887e-25	1.11376e-24	45.5235	non
IFITM2	-0.252842	11.3823	-10.7225	4.85113e-25	1.70174e-24	45.5217	non
CDK2	-0.132471	5.3853	-10.792	2.52835e-25	8.94298e-25	45.4889	non
SAR1B	0.146474	6.03708	10.7815	2.79023e-25	9.85668e-25	45.4346	non
TNFRSF13B	0.185575	4.81643	10.7717	3.06022e-25	1.07967e-24	45.3521	non
SOCS1	0.184494	4.77307	10.7598	3.42207e-25	1.20349e-24	45.2477	non
PROS1	0.225152	5.20364	10.7623	3.34262e-25	1.17705e-24	45.221	non
THBS1	0.303697	6.38002	10.7532	3.63921e-25	1.27904e-24	45.2151	non
ST3GAL2	0.179582	5.32998	10.76	3.41302e-25	1.20107e-24	45.1928	non
KCTD12	0.25082	8.91283	10.7092	5.49607e-25	1.92067e-24	45.1577	non
PECR	0.171088	6.06837	10.743	4.00416e-25	1.40641e-24	45.0797	non
DRG1	0.13342	6.82452	10.726	4.69692e-25	1.64869e-24	45.0322	non
FAM102A	-0.198878	7.12091	-10.7175	5.0854e-25	1.78053e-24	45.0077	non
PSMA3	0.192939	7.81437	10.6985	6.07379e-25	2.11721e-24	44.9247	non
DNASE2	-0.209541	6.42978	-10.7114	5.38293e-25	1.88232e-24	44.8439	non
KCTD2	0.0992016	5.74705	10.7213	4.90763e-25	1.72047e-24	44.8437	non
ATP5H	0.17187	8.98843	10.6739	7.6457e-25	2.65179e-24	44.8392	non
MRPL11	0.146461	6.11772	10.7161	5.15211e-25	1.80275e-24	44.8361	non
C19orf53	0.200853	7.75229	10.6899	6.58568e-25	2.29132e-24	44.8356	non
PFAS	-0.165059	5.02519	-10.7182	5.05341e-25	1.77045e-24	44.8215	non
FOLR3	0.473149	7.5717	10.6908	6.53095e-25	2.27371e-24	44.8137	non
SPIN1	-0.120214	6.45961	-10.7077	5.57601e-25	1.94738e-24	44.8113	non
LTBR	0.261846	6.3154	10.707	5.61171e-25	1.95861e-24	44.7766	non
CGRRF1	0.134832	5.78255	10.7004	5.96712e-25	2.08134e-24	44.6526	non
C1RL	0.164456	6.02959	10.6964	6.19758e-25	2.15901e-24	44.6414	non
NDUFV1	-0.209235	7.33682	-10.6726	7.73634e-25	2.68154e-24	44.6246	non
FCHSD2	-0.164421	6.41649	-10.6793	7.27119e-25	2.52506e-24	44.5424	non
GMIP	0.275597	7.39324	10.6637	8.40973e-25	2.91313e-24	44.5402	non
CHUK	0.210924	6.03736	10.6828	7.03382e-25	2.44416e-24	44.5162	non
PHKG2	0.158409	5.45263	10.6831	7.01796e-25	2.44019e-24	44.4754	non
ARFGAP1	0.188668	5.67015	10.6761	7.48745e-25	2.59853e-24	44.4187	non
PLCG1	-0.278579	6.49455	-10.6625	8.49992e-25	2.94253e-24	44.4019	non
POLR2F	0.245277	7.44685	10.6431	1.01847e-24	3.51917e-24	44.3588	non
ACAA1	0.237969	7.5336	10.6399	1.0499e-24	3.62551e-24	44.3414	non
IARS	-0.0970832	6.72118	-10.6481	9.72021e-25	3.36286e-24	44.2993	non
SPINT2	-0.204363	6.9422	-10.6381	1.06783e-24	3.6851e-24	44.2434	non
SLC35A1	0.216212	7.54552	10.6277	1.17566e-24	4.05471e-24	44.2312	non
PHF2	0.140848	6.27559	10.6439	1.01098e-24	3.49547e-24	44.1884	non
ITGAM	0.195222	8.41052	10.6099	1.38733e-24	4.76986e-24	44.182	non
GMPR2	0.0983498	6.71649	10.6217	1.24307e-24	4.28185e-24	44.0503	non
KRCC1	0.127679	6.91579	10.6123	1.35652e-24	4.66974e-24	43.9942	non
KIF13B	-0.158609	5.4092	-10.6273	1.18019e-24	4.0678e-24	43.9599	non
FAH	0.188355	5.01499	10.6111	1.37171e-24	4.71908e-24	43.8367	non
DUSP2	-0.235887	5.95261	-10.6082	1.40962e-24	4.84349e-24	43.824	non
RIOK3	0.175959	7.98861	10.5766	1.88963e-24	6.46871e-24	43.8224	non
PEA15	-0.249095	7.38842	-10.5817	1.80313e-24	6.17641e-24	43.7935	non
ASGR1	0.276472	6.99083	10.5882	1.69699e-24	5.81643e-24	43.7812	non
NCAPD2	-0.173063	5.84463	-10.5952	1.5904e-24	5.46125e-24	43.6905	non
HOXB2	-0.210859	5.94904	-10.5887	1.68965e-24	5.79489e-24	43.643	non
CBFA2T3	-0.161939	5.51924	-10.5902	1.66631e-24	5.71839e-24	43.6199	non
GLS	-0.193195	6.92753	-10.5677	2.05291e-24	7.02331e-24	43.5922	non
PBX2	0.248185	6.53578	10.5674	2.05813e-24	7.03683e-24	43.5195	non
GEMIN8	-0.160065	4.34711	-10.5602	2.20086e-24	7.5109e-24	43.4608	non
LMBR1L	0.124731	6.16643	10.5626	2.1525e-24	7.3504e-24	43.4239	non
SEC22B	0.156848	7.5362	10.5372	2.7237e-24	9.2723e-24	43.3974	non
BPGM	0.27462	5.46979	10.5636	2.13154e-24	7.28331e-24	43.3744	non
SP2	-0.118686	6.97047	-10.5408	2.63444e-24	8.97397e-24	43.3497	non
PELI2	0.238778	6.37087	10.5437	2.56419e-24	8.74005e-24	43.2771	non
EHBP1	-0.128239	5.34833	-10.551	2.39597e-24	8.17171e-24	43.2573	non
N6AMT1	-0.175267	4.20839	-10.52	3.19249e-24	1.08482e-23	43.1139	non
BRD2	-0.216104	8.15596	-10.4888	4.25772e-24	1.44147e-23	43.0451	non
CLEC1B	0.203782	5.93422	10.5237	3.08415e-24	1.0493e-23	43.0375	non
UNG	-0.115549	5.42997	-10.5222	3.1267e-24	1.06312e-23	42.9929	non
ROGDI	0.17268	6.18936	10.5153	3.33471e-24	1.13245e-23	42.9919	non
FARS2	-0.112087	5.8356	-10.5093	3.52198e-24	1.19531e-23	42.8994	non
MCM3AP	-0.151191	6.66234	-10.4925	4.11424e-24	1.39546e-23	42.8599	non
PRF1	-0.276638	9.40032	-10.4418	6.55844e-24	2.20958e-23	42.7557	non
RB1CC1	0.169488	7.00876	10.4753	4.82174e-24	1.62944e-23	42.7499	non
CUTA	-0.202203	8.14277	-10.4561	5.7537e-24	1.94082e-23	42.7446	non
SPRR1A	0.192095	5.2101	10.4914	4.15397e-24	1.40807e-23	42.719	non
IRAK4	0.127705	5.68573	10.49	4.20895e-24	1.42584e-23	42.7064	non
PROCR	-0.175419	4.10694	-10.47	5.06323e-24	1.71e-23	42.6728	non
ANGEL1	-0.127183	5.27472	-10.4838	4.45593e-24	1.50766e-23	42.6435	non
TGDS	-0.148753	5.79963	-10.4784	4.68297e-24	1.58351e-23	42.6138	non
COASY	-0.181033	6.88764	-10.4482	6.18618e-24	2.08543e-23	42.4913	non
BTG1	-0.241299	10.3999	-10.4016	9.48912e-24	3.18724e-23	42.4865	non
ACAD10	-0.151485	4.95439	-10.4571	5.69921e-24	1.92361e-23	42.4252	non
TMEM177	-0.154627	4.52945	-10.4404	6.64502e-24	2.23739e-23	42.3354	non
NDUFV2	0.201126	7.58109	10.4083	8.91821e-24	2.9973e-23	42.2266	non
UBN1	0.273708	8.1001	10.3983	9.77327e-24	3.28069e-23	42.2053	non
DPM1	0.122753	8.01667	10.3981	9.79835e-24	3.28711e-23	42.1946	non
TFDP1	0.239104	6.70341	10.4125	8.58095e-24	2.8857e-23	42.129	non
OSBPL7	-0.162726	5.53693	-10.4257	7.6075e-24	2.5599e-23	42.114	non
FOXN2	0.205409	7.63688	10.3891	1.06402e-23	3.5609e-23	42.0593	non
GMFB	0.205243	6.87469	10.3978	9.8186e-24	3.29191e-23	42.0226	non
TRIP4	0.129363	6.57166	10.3942	1.01543e-23	3.40034e-23	41.9438	non
SLC6A6	0.126048	7.02363	10.3857	1.09771e-23	3.67143e-23	41.9372	non
STK11	0.174186	5.96137	10.3962	9.96883e-24	3.34025e-23	41.8768	non
TP53I3	0.13386	4.9869	10.3775	1.18323e-23	3.95507e-23	41.7008	non
LIN7A	0.16675	4.96386	10.3705	1.26096e-23	4.21235e-23	41.6414	non
MAPK9	-0.103447	6.09939	-10.3617	1.36609e-23	4.56079e-23	41.586	non
TNFRSF10C	0.207905	5.17308	10.3584	1.40798e-23	4.69781e-23	41.511	non
PRDX1	-0.258363	8.46379	-10.3149	2.09366e-23	6.97298e-23	41.5046	non
EMG1	0.207568	6.12052	10.3497	1.52432e-23	5.08291e-23	41.4747	non
GZMK	-0.32712	7.84277	-10.3034	2.32452e-23	7.71864e-23	41.3232	non
MT1X	-0.21587	7.17596	-10.3046	2.3003e-23	7.64279e-23	41.2353	non
DAD1	0.217776	8.70408	10.2808	2.85673e-23	9.44615e-23	41.2172	non
PSMD5	-0.109036	5.95421	-10.3196	2.00652e-23	6.6868e-23	41.1866	non
MAP3K11	0.231799	6.83361	10.3007	2.38301e-23	7.90812e-23	41.1362	non
PPP1R3D	0.149444	5.52522	10.314	2.1109e-23	7.02617e-23	41.0992	non
ZNF134	-0.131477	4.98878	-10.3068	2.25404e-23	7.49811e-23	41.0574	non
MPZL1	0.239321	5.75338	10.3059	2.27248e-23	7.5549e-23	41.0386	non
DUSP11	-0.111414	6.66424	-10.2905	2.61399e-23	8.65905e-23	41.0253	non
RIN3	0.135299	7.24931	10.2804	2.8652e-23	9.46852e-23	41.0214	non
RNF40	0.160678	6.17582	10.2969	2.46752e-23	8.18364e-23	41.0049	non
GNG7	-0.210762	5.53693	-10.2937	2.53929e-23	8.41664e-23	40.9192	non
GPD1L	-0.183897	6.29918	-10.2836	2.78318e-23	9.20847e-23	40.9095	non
FBXO3	-0.121641	5.13244	-10.289	2.6502e-23	8.77373e-23	40.8829	non
YWHAQ	-0.266634	8.51191	-10.241	4.09774e-23	1.34612e-22	40.8448	non
SLC11A1	0.259397	7.99594	10.2484	3.82994e-23	1.26039e-22	40.8377	non
H2AFZ	0.216068	8.97029	10.2323	4.4346e-23	1.45419e-22	40.8104	non
EPRS	-0.208236	7.12458	-10.2583	3.50269e-23	1.15545e-22	40.8101	non
HPCAL1	-0.250356	7.67281	-10.2489	3.81323e-23	1.25564e-22	40.8077	non
CBX7	-0.228467	7.16717	-10.2502	3.76816e-23	1.24154e-22	40.7448	non
FCER2	-0.214817	5.04359	-10.2723	3.08503e-23	1.01889e-22	40.7401	non
CACNA2D3	-0.1594	5.58196	-10.2669	3.24048e-23	1.06959e-22	40.6783	non
TRAFD1	0.216903	6.83431	10.2449	3.95636e-23	1.30122e-22	40.6339	non
KCTD13	-0.166784	5.64777	-10.2579	3.51393e-23	1.15847e-22	40.6022	non
HLADMB	-0.291917	9.20244	-10.2017	5.84522e-23	1.90884e-22	40.5676	non
CYB5R4	0.189085	6.6943	10.2364	4.27331e-23	1.40213e-22	40.5363	non
NFKB1	-0.249948	8.05685	-10.2124	5.30527e-23	1.73456e-22	40.5318	non
CLDN14	0.202797	4.87623	10.244	3.98707e-23	1.31055e-22	40.5123	non
CRYL1	-0.12532	5.65164	-10.2392	4.16527e-23	1.36749e-22	40.433	non
SLC25A38	0.169385	6.54488	10.2244	4.76266e-23	1.55992e-22	40.4062	non
UBE2G1	-0.125513	6.32423	-10.2249	4.74165e-23	1.55396e-22	40.3834	non
UBE4B	0.207092	6.31641	10.214	5.23299e-23	1.71295e-22	40.2781	non
CCL23	-0.241258	3.57398	-10.1928	6.33628e-23	2.06676e-22	40.2551	non
NDRG1	-0.212118	7.23381	-10.1941	6.26127e-23	2.0435e-22	40.2513	non
SLC29A3	-0.135378	4.89395	-10.2131	5.27338e-23	1.72515e-22	40.2262	non
EIF2B5	-0.218791	6.18392	-10.2022	5.81865e-23	1.90129e-22	40.1627	non
PLEKHO1	-0.252499	7.67619	-10.1656	8.09902e-23	2.63862e-22	40.0614	non
CLCN6	-0.132141	4.86019	-10.1784	7.21533e-23	2.3521e-22	39.9199	non
LRMP	0.238717	7.50623	10.143	9.92367e-23	3.21981e-22	39.8261	non
IQCC	-0.198081	3.93624	-10.1471	9.56705e-23	3.1114e-22	39.7859	non
GRAMD3	-0.141758	4.72349	-10.152	9.14727e-23	2.97838e-22	39.7045	non
NUP205	-0.148616	6.18662	-10.1476	9.52172e-23	3.09848e-22	39.673	non
NTHL1	-0.154075	4.77607	-10.1454	9.70864e-23	3.15374e-22	39.6374	non
TNFRSF17	0.200255	5.04758	10.1467	9.59939e-23	3.12008e-22	39.6191	non
C7orf43	0.14283	5.82546	10.1443	9.8092e-23	3.18454e-22	39.5949	non
SNX5	-0.12366	6.4051	-10.1345	1.07103e-22	3.47299e-22	39.5875	non
RALA	0.148295	7.33538	10.1017	1.43852e-22	4.65374e-22	39.4346	non
SERPINB8	0.150368	5.16581	10.1262	1.15421e-22	3.74054e-22	39.4239	non
DDX18	-0.23249	7.14452	-10.099	1.47313e-22	4.76293e-22	39.3897	non
RHOT1	0.153834	7.17326	10.0988	1.47524e-22	4.76695e-22	39.3842	non
LIMD2	0.0977581	5.92952	10.1189	1.23208e-22	3.99055e-22	39.3804	non
LANCL2	-0.129939	4.74196	-10.11	1.33523e-22	4.32211e-22	39.3269	non
RNF34	-0.144626	6.83806	-10.0937	1.54475e-22	4.98577e-22	39.2916	non
FCGRT	0.29092	8.66857	10.0641	2.01292e-22	6.48542e-22	39.2766	non
FAM53C	0.255324	7.83677	10.0673	1.9559e-22	6.30539e-22	39.1999	non
POR	0.190654	5.84422	10.0937	1.54476e-22	4.98577e-22	39.1462	non
USF2	0.182609	6.6802	10.0636	2.0227e-22	6.51314e-22	38.9928	non
FAF1	-0.109279	5.69573	-10.0773	1.78934e-22	5.77179e-22	38.9906	non
NMI	0.179768	7.67712	10.0445	2.39956e-22	7.70422e-22	38.9764	non
COX7A2L	0.21378	8.17854	10.035	2.61197e-22	8.38132e-22	38.9593	non
CPA3	-0.160953	5.70172	-10.0623	2.04581e-22	6.58373e-22	38.8593	non
ZNF329	-0.125984	5.14032	-10.0622	2.04854e-22	6.58866e-22	38.8543	non
GPKOW	-0.16056	6.0137	-10.0563	2.15825e-22	6.9375e-22	38.8394	non
CEP192	-0.139272	5.56475	-10.0463	2.35995e-22	7.58143e-22	38.7084	non
ANAPC5	-0.16769	8.24462	-9.99791	3.63415e-22	1.16276e-21	38.647	non
DENND4C	0.158573	6.82311	10.016	3.09445e-22	9.92378e-22	38.594	non
PVRIG	-0.1398	7.18722	-10.0008	3.54164e-22	1.13447e-21	38.5248	non
S100A11	0.227922	9.57982	9.96262	4.97263e-22	1.58186e-21	38.477	non
CEBPB	-0.338448	10.2954	-9.95099	5.51311e-22	1.75178e-21	38.4532	non
HLAB	-0.29072	11.2755	-9.93953	6.10239e-22	1.9368e-21	38.4415	non
COQ9	-0.134592	5.97474	-10.0033	3.46435e-22	1.11036e-21	38.3648	non
WRN	-0.118114	4.88264	-10.0007	3.54458e-22	1.13476e-21	38.3388	non
BRD7	-0.137794	6.36485	-9.99151	3.84708e-22	1.22875e-21	38.3141	non
HDGF	0.283841	7.67967	9.96544	4.84962e-22	1.54451e-21	38.2776	non
MRPS2	-0.10641	5.54249	-9.99495	3.73114e-22	1.1931e-21	38.2528	non
MRPS18A	0.131512	5.63713	9.99294	3.79826e-22	1.21386e-21	38.2379	non
GAS6	-0.114908	5.1689	-9.98971	3.9089e-22	1.24778e-21	38.2116	non
TTLL4	0.165028	5.18063	9.98777	3.97713e-22	1.26883e-21	38.1964	non
LILRB5	-0.227373	3.57461	-9.95983	5.09731e-22	1.62059e-21	38.1885	non
PRKCSH	-0.165101	7.09863	-9.96373	4.92414e-22	1.56734e-21	38.1847	non
ALDH3B1	0.193921	5.88758	9.97385	4.50083e-22	1.43508e-21	38.0905	non
OSM	0.251014	5.22674	9.96767	4.75471e-22	1.51515e-21	38.0183	non
CORO1A	-0.21972	9.86207	-9.89823	8.79361e-22	2.78297e-21	37.9467	non
GCM1	-0.2357	3.53228	-9.92955	6.66673e-22	2.1147e-21	37.9297	non
PSMD13	0.11316	6.19072	9.9468	5.72199e-22	1.81711e-21	37.8907	non
VPS35	-0.163297	7.23014	-9.9261	6.8734e-22	2.179e-21	37.8748	non
CHIC2	0.252644	7.23909	9.92475	6.95618e-22	2.20398e-21	37.8555	non
SETX	0.114878	7.08401	9.89793	8.81737e-22	2.7873e-21	37.5986	non
UBL4A	-0.157329	6.09262	-9.9057	8.23195e-22	2.6067e-21	37.5224	non
ETFDH	-0.124184	5.05407	-9.8981	8.80435e-22	2.78477e-21	37.4165	non
ACAA2	-0.190082	5.99132	-9.88917	9.52611e-22	3.00962e-21	37.3656	non
LILRA3	0.321619	7.43763	9.86362	1.19333e-21	3.76155e-21	37.3495	non
ACOT7	-0.123247	4.76894	-9.88269	1.00872e-21	3.18507e-21	37.3184	non
UBAP1	0.222047	7.02496	9.86588	1.16982e-21	3.68955e-21	37.3069	non
CTNNA1	-0.203729	7.00745	-9.86059	1.22566e-21	3.85906e-21	37.2674	non
IQCB1	-0.129852	5.73816	-9.87398	1.08925e-21	3.43738e-21	37.2039	non
C11orf68	0.116931	6.32859	9.86129	1.21813e-21	3.83753e-21	37.1611	non
TPM4	0.163184	6.65358	9.84558	1.39875e-21	4.39904e-21	37.0725	non
TMEM126B	0.101563	7.01728	9.83722	1.50541e-21	4.73178e-21	37.0581	non
SEC22A	-0.145562	4.90398	-9.85107	1.33278e-21	4.19393e-21	37.023	non
INTS1	0.184511	6.06964	9.83186	1.57815e-21	4.95759e-21	36.8684	non
COQ2	0.204747	6.11722	9.82773	1.63634e-21	5.13748e-21	36.8384	non
CBR4	-0.120229	5.91423	-9.82645	1.65486e-21	5.19267e-21	36.8074	non
RNF113A	-0.209169	6.51537	-9.81585	1.81631e-21	5.69604e-21	36.8004	non
MAP3K1	0.219053	8.75874	9.77653	2.56368e-21	8.00807e-21	36.7674	non
TLR2	0.14891	7.29222	9.78737	2.33145e-21	7.29914e-21	36.6676	non
TRAPPC2L	0.238418	6.92233	9.79223	2.2343e-21	6.99895e-21	36.6491	non
SELL	0.323116	10.1852	9.74466	3.38703e-21	1.05383e-20	36.636	non
LAPTM5	0.166987	10.6772	9.73725	3.61348e-21	1.12176e-20	36.6209	non
MGAT1	-0.191056	8.222	-9.76081	2.94136e-21	9.17744e-21	36.5729	non
EXOSC5	-0.152221	5.69712	-9.80018	2.08393e-21	6.53163e-21	36.5581	non
MBP	-0.27219	8.47195	-9.75062	3.21538e-21	1.00211e-20	36.5172	non
TMEM2	0.263341	6.42821	9.78499	2.38059e-21	7.44877e-21	36.5095	non
PURG	0.192458	4.59023	9.78086	2.46821e-21	7.71419e-21	36.4664	non
PMP22	-0.171476	4.07956	-9.77116	2.68686e-21	8.38809e-21	36.4572	non
DDX58	0.171748	5.92765	9.78446	2.3917e-21	7.47929e-21	36.4396	non
DDOST	-0.236038	8.39967	-9.74146	3.48314e-21	1.08312e-20	36.4286	non
TERF2IP	-0.187927	7.59162	-9.74056	3.51047e-21	1.09101e-20	36.313	non
EML4	-0.248502	7.39138	-9.73776	3.59749e-21	1.11742e-20	36.2609	non
BFAR	0.114668	6.51693	9.74701	3.31837e-21	1.03305e-20	36.1965	non
GTF2H4	-0.124847	5.01839	-9.75663	3.0509e-21	9.51385e-21	36.1887	non
COG7	-0.118305	4.80688	-9.74728	3.31048e-21	1.03117e-20	36.1352	non
ASNSD1	0.162629	7.03717	9.7284	3.9034e-21	1.20973e-20	36.1161	non
POMP	0.131412	8.14909	9.70455	4.8047e-21	1.48573e-20	36.0719	non
PANK4	-0.102798	5.76203	-9.7294	3.86947e-21	1.19988e-20	35.9495	non
CLDN15	-0.17559	5.4756	-9.73036	3.83725e-21	1.19056e-20	35.9421	non
RAB2A	0.140769	7.19953	9.70291	4.87374e-21	1.50623e-20	35.9228	non
TAOK2	0.137468	4.70341	9.71643	4.33264e-21	1.342e-20	35.8895	non
ALDH1A1	-0.237599	6.16723	-9.71302	4.46298e-21	1.3816e-20	35.8594	non
FGF9	-0.140422	4.46487	-9.70704	4.70159e-21	1.45465e-20	35.8409	non
CS	-0.198818	7.9114	-9.67983	5.95649e-21	1.83573e-20	35.8339	non
UNC119	0.174681	6.48514	9.69696	5.13253e-21	1.58533e-20	35.7584	non
WAS	-0.273625	9.56572	-9.64676	7.93542e-21	2.43476e-20	35.7395	non
LSM5	0.15605	7.32331	9.67781	6.06205e-21	1.86618e-20	35.7256	non
FAM60A	-0.260274	6.64233	-9.68031	5.93164e-21	1.82909e-20	35.6488	non
TMEM140	0.265455	7.60576	9.6599	7.08101e-21	2.17744e-20	35.6112	non
ALAD	-0.118262	5.67245	-9.6896	5.47172e-21	1.68915e-20	35.5991	non
IFRD1	0.15862	6.39654	9.67908	5.99558e-21	1.84675e-20	35.5913	non
GUSB	-0.164424	7.28283	-9.65954	7.10324e-21	2.18306e-20	35.5692	non
VARS	-0.109784	5.3977	-9.68228	5.83113e-21	1.7991e-20	35.5258	non
KBTBD2	-0.192561	7.11801	-9.65405	7.44975e-21	2.28828e-20	35.4968	non
VPREB3	-0.249536	5.69879	-9.66797	6.60233e-21	2.03137e-20	35.418	non
GTF2F2	0.151286	5.53662	9.6519	7.58965e-21	2.32996e-20	35.266	non
PHB	-0.150356	6.18811	-9.64072	8.36173e-21	2.56414e-20	35.2381	non
MRPL3	0.183362	7.35312	9.61931	1.00631e-20	3.07904e-20	35.2276	non
MYNN	0.165535	4.4503	9.62866	9.28174e-21	2.84311e-20	35.1761	non
TMED1	0.167958	5.7883	9.63264	8.96718e-21	2.74828e-20	35.116	non
TLK2	0.127505	6.15338	9.61988	1.00136e-20	3.06558e-20	35.0494	non
MGRN1	0.23206	6.40603	9.61409	1.05273e-20	3.21751e-20	35.034	non
DUSP14	-0.134007	4.86798	-9.61853	1.01309e-20	3.09807e-20	35.0183	non
RNPEPL1	0.132283	5.96609	9.61154	1.07624e-20	3.28755e-20	34.9544	non
SEC24C	-0.119964	7.11051	-9.58782	1.32068e-20	4.02979e-20	34.9269	non
SLC2A4RG	-0.129937	5.87347	-9.59643	1.22621e-20	3.74361e-20	34.8188	non
AOAH	0.202435	7.00057	9.56819	1.56405e-20	4.76711e-20	34.7348	non
TDRD1	0.242655	5.76897	9.58172	1.39203e-20	4.24515e-20	34.6787	non
GOLGA3	-0.198949	6.39236	-9.56075	1.66754e-20	5.07975e-20	34.5851	non
RNF4	-0.136718	7.10774	-9.54522	1.90573e-20	5.80214e-20	34.5637	non
LYST	0.169221	7.65607	9.52645	2.23917e-20	6.8061e-20	34.4801	non
DCUN1D1	0.140948	6.37745	9.54304	1.94189e-20	5.90897e-20	34.4247	non
ATP6AP1	-0.177801	8.71328	-9.50148	2.77365e-20	8.41682e-20	34.4107	non
PSMC4	-0.18544	6.24597	-9.54185	1.96173e-20	5.96606e-20	34.4025	non
ARID1A	-0.16248	7.73094	-9.50885	2.60382e-20	7.90579e-20	34.3478	non
RANBP3	-0.106626	5.25791	-9.52335	2.29942e-20	6.9854e-20	34.1696	non
DHTKD1	0.104111	5.59284	9.4985	2.84517e-20	8.62909e-20	33.9592	non
SNF8	0.130982	6.46288	9.4762	3.44313e-20	1.04369e-19	33.8707	non
TRIB1	0.290688	7.26285	9.45685	4.06185e-20	1.22788e-19	33.8298	non
WDR26	0.154622	6.81117	9.46329	3.84465e-20	1.16413e-19	33.8148	non
CARS2	0.140561	6.80131	9.46285	3.85912e-20	1.16787e-19	33.81	non
CYLD	0.128199	7.19423	9.44653	4.4357e-20	1.33797e-19	33.7352	non
GAA	0.118472	6.65181	9.45607	4.0891e-20	1.23544e-19	33.7298	non
ZNF250	-0.145059	4.57013	-9.45839	4.00878e-20	1.2125e-19	33.7013	non
ICAM1	0.110765	5.43974	9.46383	3.82706e-20	1.15944e-19	33.662	non
GCC1	-0.171301	6.09611	-9.45107	4.26713e-20	1.28782e-19	33.612	non
NDUFA3	-0.209259	8.28929	-9.40846	6.13336e-20	1.84501e-19	33.5743	non
ZNF544	-0.142096	5.67153	-9.4516	4.24801e-20	1.28275e-19	33.5695	non
MEF2D	-0.231042	6.57707	-9.43426	4.92471e-20	1.48466e-19	33.5418	non
PROSC	-0.146366	7.32237	-9.41299	5.90148e-20	1.77816e-19	33.4784	non
MED9	-0.117203	4.70983	-9.41211	5.94578e-20	1.79053e-19	33.2894	non
PTGDR	-0.139233	5.89966	-9.41182	5.96084e-20	1.79409e-19	33.2561	non
RNF38	-0.10633	7.16033	-9.38701	7.35858e-20	2.20997e-19	33.2338	non
MTMR4	0.138556	6.56526	9.39532	6.85771e-20	2.06067e-19	33.2041	non
CEP135	-0.15583	5.59771	-9.39734	6.74104e-20	2.02671e-19	33.1077	non
SAFB2	-0.138855	7.31901	-9.36742	8.6882e-20	2.60787e-19	33.0949	non
ARCN1	-0.193723	7.54683	-9.35927	9.30959e-20	2.79136e-19	33.0611	non
TUBG1	-0.123333	4.58574	-9.36476	8.88641e-20	2.66592e-19	32.9111	non
ADAM8	0.22996	7.4644	9.3381	1.11345e-19	3.32953e-19	32.8634	non
ADRM1	-0.151663	6.95677	-9.34264	1.07155e-19	3.2077e-19	32.8302	non
TDG	0.130349	6.73331	9.34164	1.08062e-19	3.23309e-19	32.7801	non
HOXC4	-0.129893	4.4151	-9.34526	1.0481e-19	3.13918e-19	32.7751	non
NCBP2	-0.128765	6.69235	-9.33683	1.12549e-19	3.36369e-19	32.739	non
RSL1D1	0.17235	7.91574	9.3102	1.40916e-19	4.20015e-19	32.6957	non
ACP6	0.13925	5.2934	9.34535	1.04726e-19	3.13837e-19	32.6682	non
RGS2	0.214226	9.90024	9.27707	1.86259e-19	5.53377e-19	32.6436	non
RBKS	0.150671	4.53417	9.32658	1.22723e-19	3.6638e-19	32.6057	non
DDX19A	-0.07688	5.79235	-9.33024	1.18991e-19	3.55432e-19	32.5591	non
MRPS28	0.10719	5.90094	9.31828	1.31633e-19	3.9277e-19	32.4678	non
TAOK1	0.101777	7.33647	9.28948	1.67791e-19	4.99042e-19	32.4412	non
ZXDC	-0.122312	6.03228	-9.31157	1.39293e-19	4.15401e-19	32.4314	non
SPIB	-0.15348	5.96503	-9.30829	1.43207e-19	4.26613e-19	32.3964	non
ICA1	0.174064	4.77403	9.29741	1.56955e-19	4.67318e-19	32.3246	non
CDKN1C	-0.212556	6.82838	-9.27949	1.82497e-19	5.42491e-19	32.2843	non
PARD6A	0.132265	4.87488	9.29045	1.66424e-19	4.95243e-19	32.2506	non
TBC1D10B	0.205848	6.46769	9.2666	2.03378e-19	6.03913e-19	32.1118	non
TBC1D9B	-0.128178	6.4357	-9.26347	2.08813e-19	6.19717e-19	32.0878	non
PSMC2	0.221158	7.58371	9.23257	2.70578e-19	8.00876e-19	32.0024	non
NADK	0.237124	8.14113	9.21676	3.08865e-19	9.13225e-19	31.948	non
ACACA	-0.179504	4.49366	-9.247	2.39752e-19	7.10775e-19	31.9425	non
AHCTF1	0.127552	5.95627	9.2527	2.28558e-19	6.77953e-19	31.9277	non
TAF1C	-0.172807	6.30817	-9.24448	2.44874e-19	7.25571e-19	31.9119	non
C14orf2	0.197297	8.89575	9.19635	3.66349e-19	1.07962e-18	31.8715	non
ZFAND5	-0.270872	8.70801	-9.18668	3.97128e-19	1.16919e-18	31.7779	non
PRKAG1	0.100504	5.9906	9.23355	2.68382e-19	7.94802e-19	31.7732	non
TSC22D3	0.213021	9.51012	9.17625	4.33248e-19	1.27418e-18	31.7691	non
MMD	-0.183113	7.62815	-9.19902	3.58268e-19	1.05647e-18	31.739	non
HIST1H2BC	0.174528	4.77808	9.21876	3.03755e-19	8.98596e-19	31.6706	non
NINJ1	-0.25916	8.55746	-9.17225	4.47917e-19	1.31522e-18	31.6411	non
NXT1	-0.170647	6.20962	-9.20777	3.32986e-19	9.82966e-19	31.5936	non
PDZD8	0.142669	5.18151	9.21179	3.21977e-19	9.51483e-19	31.563	non
IQSEC1	0.213109	7.56422	9.17777	4.27769e-19	1.25873e-18	31.5465	non
ICMT	-0.105373	5.21563	-9.20881	3.30105e-19	9.74981e-19	31.534	non
FOLR2	-0.140305	4.70968	-9.19629	3.66509e-19	1.07962e-18	31.4888	non
CDCA4	-0.111934	5.22202	-9.20245	3.48147e-19	1.02717e-18	31.4811	non
CSF2RA	0.272636	7.25917	9.17365	4.42737e-19	1.30139e-18	31.4655	non
ZNF14	0.365887	8.54199	9.14821	5.4717e-19	1.60325e-18	31.4309	non
SLC25A28	-0.1643	7.57167	-9.16012	4.95544e-19	1.45352e-18	31.4095	non
MUS81	0.0928858	6.1833	9.17326	4.44188e-19	1.30496e-18	31.2995	non
ANAPC13	0.168017	7.7	9.13194	6.26445e-19	1.83069e-18	31.1895	non
COMMD9	0.153363	6.55209	9.14895	5.4381e-19	1.59425e-18	31.1525	non
GART	-0.111255	5.49921	-9.16059	4.93616e-19	1.44864e-18	31.1324	non
ACSL1	0.326463	7.79292	9.12294	6.75041e-19	1.96958e-18	31.1259	non
OPTN	0.159105	6.44171	9.14546	5.59859e-19	1.6387e-18	31.1067	non
STK3	0.149162	4.85457	9.14743	5.50764e-19	1.61293e-18	31.0696	non
ELF4	-0.20457	7.56945	-9.11231	7.37257e-19	2.14884e-18	31.0172	non
GRM2	-0.150374	4.23153	-9.12851	6.44502e-19	1.88246e-18	31.007	non
OSGIN2	0.154395	5.48981	9.14435	5.65054e-19	1.65303e-18	30.9977	non
OVGP1	-0.160996	4.71611	-9.13521	6.09639e-19	1.78252e-18	30.984	non
HIVEP1	-0.119138	5.37298	-9.12328	6.73147e-19	1.96509e-18	30.8243	non
PPOX	-0.0920146	5.77563	-9.12074	6.87498e-19	2.00487e-18	30.8219	non
XKR8	0.0905988	6.18554	9.10555	7.79796e-19	2.27044e-18	30.743	non
TMEM87A	-0.197009	8.04572	-9.07034	1.04355e-18	3.02723e-18	30.739	non
ING4	0.108798	5.6416	9.11122	7.43946e-19	2.1672e-18	30.7309	non
TTLL1	-0.122023	4.42627	-9.097	8.37007e-19	2.43573e-18	30.7173	non
FKBP11	-0.20254	7.7313	-9.06537	1.0873e-18	3.15249e-18	30.6558	non
ZNF83	0.170815	6.60814	9.08323	9.38073e-19	2.72697e-18	30.6214	non
IVD	-0.119062	5.73235	-9.0898	8.88435e-19	2.58403e-18	30.5647	non
LANCL1	-0.146813	6.29512	-9.08074	9.57563e-19	2.7807e-18	30.5601	non
ECD	-0.102737	5.32919	-9.0814	9.52317e-19	2.76692e-18	30.4816	non
NMT2	-0.146512	5.91951	-9.07714	9.86491e-19	2.8632e-18	30.481	non
SMCHD1	0.142626	7.38404	9.0481	1.25387e-18	3.62972e-18	30.4577	non
GGPS1	0.100022	6.45073	9.05603	1.17444e-18	3.40336e-18	30.3762	non
DAP	-0.228035	7.41518	-9.03539	1.3923e-18	4.02624e-18	30.3662	non
PGM5	-0.192602	3.8564	-9.04263	1.31166e-18	3.79502e-18	30.3656	non
RAB33A	-0.127956	4.94778	-9.04978	1.23655e-18	3.58146e-18	30.2519	non
ZNF467	0.270328	8.03642	8.99948	1.87069e-18	5.39836e-18	30.1521	non
AP1G1	0.129015	6.48173	9.02028	1.57681e-18	4.55742e-18	30.089	non
MGST2	0.193331	6.7093	9.01447	1.65392e-18	4.7778e-18	30.0758	non
PDK3	0.132945	6.84232	9.00978	1.719e-18	4.96321e-18	30.0596	non
ATF4	0.209031	8.50445	8.96294	2.52432e-18	7.25053e-18	29.917	non
OAS2	-0.172133	7.09802	-8.9741	2.30372e-18	6.6238e-18	29.8182	non
CYFIP2	-0.233753	8.61536	-8.94244	2.98514e-18	8.55638e-18	29.772	non
RIC8B	-0.0991714	5.07887	-8.99257	1.9799e-18	5.71054e-18	29.772	non
HSP90B1	-0.253173	7.20384	-8.96063	2.57252e-18	7.38514e-18	29.7276	non
KYNU	0.183642	6.95221	8.96587	2.46447e-18	7.08232e-18	29.72	non
COX15	0.0941571	6.07251	8.98008	2.19351e-18	6.32006e-18	29.705	non
CDK4	-0.147937	6.24595	-8.97599	2.26829e-18	6.5287e-18	29.7001	non
MRPS15	0.163301	7.24497	8.95739	2.64159e-18	7.5795e-18	29.6989	non
ABCG1	0.133048	5.23341	8.98252	2.1502e-18	6.1985e-18	29.6807	non
BCL10	-0.135415	4.80179	-8.97543	2.27882e-18	6.55561e-18	29.6671	non
RAPGEF6	0.155662	8.08953	8.93352	3.21063e-18	9.19794e-18	29.6271	non
RFC4	-0.106521	5.51486	-8.97614	2.26552e-18	6.52414e-18	29.6253	non
PRRG4	0.197851	5.64979	8.95713	2.64719e-18	7.59164e-18	29.4761	non
DECR1	-0.195168	7.92024	-8.89057	4.55646e-18	1.30064e-17	29.265	non
KLRD1	-0.171463	7.15488	-8.90371	4.09435e-18	1.17054e-17	29.2586	non
MS4A6A	0.272232	8.97904	8.87228	5.2869e-18	1.50294e-17	29.2401	non
TMEM14A	-0.091538	5.44446	-8.92792	3.36078e-18	9.6231e-18	29.2335	non
SDF4	-0.122604	6.98508	-8.90323	4.1104e-18	1.17452e-17	29.2262	non
MAPKAPK3	-0.248172	8.26032	-8.87912	5.00102e-18	1.42533e-17	29.2183	non
NIPSNAP1	-0.139656	5.76128	-8.9157	3.71322e-18	1.06268e-17	29.153	non
PPP1CA	-0.208023	8.12614	-8.87232	5.28496e-18	1.50294e-17	29.1458	non
BBS4	-0.119754	5.13253	-8.91538	3.72287e-18	1.06489e-17	29.1428	non
DUSP5	-0.217751	6.11635	-8.89836	4.27667e-18	1.2214e-17	29.0567	non
E2F5	-0.139201	4.68323	-8.88629	4.7179e-18	1.34533e-17	28.9655	non
SLC25A4	-0.109285	4.94662	-8.88667	4.70321e-18	1.34184e-17	28.931	non
STK19	0.111751	6.33353	8.87514	5.16518e-18	1.47136e-17	28.8936	non
RPL30	0.271933	11.572	8.79524	9.86246e-18	2.78221e-17	28.8779	non
PRKAR1A	-0.248513	8.95582	-8.82077	8.0255e-18	2.26979e-17	28.8328	non
WIPF1	0.164621	6.27476	8.86706	5.51546e-18	1.5671e-17	28.8194	non
TMEM97	-0.107249	5.15409	-8.87453	5.19104e-18	1.47796e-17	28.8124	non
DET1	-0.0938333	5.13965	-8.87349	5.23496e-18	1.4897e-17	28.8052	non
PGM1	0.201064	7.40828	8.83972	6.88459e-18	1.95311e-17	28.7762	non
CA5B	-0.164722	4.97533	-8.86249	5.7239e-18	1.62549e-17	28.7329	non
REXO2	0.15262	7.06571	8.83847	6.9545e-18	1.97193e-17	28.7132	non
FTL	-0.202738	12.2399	-8.76338	1.27481e-17	3.58346e-17	28.681	non
ALKBH4	-0.108396	4.7803	-8.8465	6.51677e-18	1.84971e-17	28.6317	non
RHOQ	0.16619	8.069	8.8029	9.27163e-18	2.61839e-17	28.576	non
LRP8	-0.126058	4.48315	-8.83014	7.43946e-18	2.10728e-17	28.5475	non
DDX28	-0.108127	5.82805	-8.83605	7.09227e-18	2.00996e-17	28.5192	non
PRR5	-0.178391	6.17379	-8.8232	7.86922e-18	2.22787e-17	28.4607	non
ERF	0.138492	5.11751	8.82117	7.99943e-18	2.26357e-17	28.3905	non
NUP133	-0.110692	6.13057	-8.80949	8.79103e-18	2.48503e-17	28.3437	non
SWAP70	-0.110801	6.48055	-8.80289	9.27229e-18	2.61839e-17	28.3421	non
TPD52L2	0.163908	8.33455	8.7626	1.28281e-17	3.60412e-17	28.2895	non
MPDU1	0.159682	6.15573	8.79576	9.82103e-18	2.77194e-17	28.2327	non
SLC22A1	0.194655	3.76726	8.76539	1.25432e-17	3.52946e-17	28.1574	non
DAZAP1	-0.0702745	6.86955	-8.76979	1.21074e-17	3.40856e-17	28.1384	non
CETP	0.199843	3.74141	8.76195	1.28954e-17	3.6212e-17	28.1347	non
ST3GAL5	-0.157602	6.32863	-8.77526	1.15854e-17	3.26492e-17	28.1	non
CD163	0.149664	7.19074	8.7581	1.33015e-17	3.73144e-17	28.0926	non
GOLGA5	-0.0870824	6.26917	-8.77314	1.17849e-17	3.31946e-17	28.0727	non
ATP6V1C1	0.0881087	5.83695	8.77796	1.1337e-17	3.19654e-17	28.0534	non
DCXR	-0.170637	6.4925	-8.76072	1.30232e-17	3.65523e-17	28.0095	non
PARP12	0.212005	7.37077	8.74389	1.49097e-17	4.17622e-17	28.0066	non
SLC2A1	0.153599	5.73853	8.76521	1.25616e-17	3.53282e-17	27.9425	non
SLC7A5	0.291173	6.24247	8.74935	1.42699e-17	3.99904e-17	27.8735	non
ITM2C	-0.178295	5.96993	-8.75214	1.39539e-17	3.91248e-17	27.8679	non
CDH2	-0.176209	3.85648	-8.73159	1.64557e-17	4.6046e-17	27.8652	non
NDN	-0.163577	4.11129	-8.73248	1.63391e-17	4.5743e-17	27.8298	non
BNIP3L	0.207284	8.16864	8.70726	1.99984e-17	5.56776e-17	27.8288	non
PABPC1	-0.214671	10.6866	-8.67002	2.69267e-17	7.44792e-17	27.8112	non
MPP1	0.239733	8.30716	8.69645	2.18043e-17	6.06137e-17	27.7606	non
TRAPPC2	-0.124016	6.52736	-8.72349	1.75601e-17	4.89876e-17	27.7184	non
REV1	-0.12074	6.10603	-8.73119	1.65089e-17	4.61714e-17	27.7177	non
TOM1	0.117994	5.9927	8.72759	1.69933e-17	4.74782e-17	27.6705	non
CISH	0.128779	6.6939	8.71357	1.90125e-17	5.30125e-17	27.6603	non
TRIM37	-0.0939937	5.4777	-8.72898	1.68037e-17	4.69722e-17	27.6429	non
SMOX	0.214206	5.83247	8.725	1.73491e-17	4.84234e-17	27.6315	non
TIA1	-0.11552	6.9643	-8.7035	2.06078e-17	5.73452e-17	27.629	non
MAPKAPK5	-0.0625179	5.58073	-8.72661	1.71261e-17	4.78253e-17	27.6274	non
LGALS1	0.309036	9.65758	8.65998	2.91706e-17	8.05649e-17	27.6227	non
NAPA	0.10595	6.51071	8.70892	1.97342e-17	5.49697e-17	27.5956	non
GZMH	-0.331424	8.33845	-8.67289	2.63178e-17	7.28316e-17	27.5889	non
CSAD	0.124796	5.57599	8.71214	1.92319e-17	5.35975e-17	27.5115	non
RNF167	-0.171	6.94356	-8.68564	2.37701e-17	6.59459e-17	27.486	non
THOC7	0.154758	7.46483	8.67297	2.62999e-17	7.28183e-17	27.461	non
NUP160	-0.122939	6.0698	-8.69832	2.14801e-17	5.97425e-17	27.4529	non
CBX6	-0.138221	6.93242	-8.67846	2.5174e-17	6.97358e-17	27.4268	non
MAPK8	0.107905	5.38537	8.693	2.24143e-17	6.22781e-17	27.3574	non
PTCD2	-0.117791	4.6435	-8.67959	2.49481e-17	6.91448e-17	27.3258	non
INTS6	0.119794	5.9868	8.68324	2.4231e-17	6.7191e-17	27.3191	non
[truncated: 3,533 more rows]
